# Supplementary material for: C–H Functionalization of Imidazo[1,5-a]pyridines: A Metal-Free Approach for Methylene Insertion to Access C(sp2)–C(sp3)–H–C(sp2) Bond Formation
Source: PubMed Central journal article supplement — ACS Omega. 2024 Dec 5;9(50):49071–80. doi: 10.1021/acsomega.4c03823 (PMC11656365; doi:10.1021/acsomega.4c03823), 2024-12-05
Supplement: ao4c03823_si_001.pdf [file ao4c03823_si_001.pdf]

# Supporting Information

## **C-H Functionalization of Imidazo[1,5-*a*]pyridines: A Metal-free Approach for Methylene Insertion to Access C(sp<sup>2</sup>)-C(sp<sup>3</sup>)-H-C(sp<sup>2</sup>) Bond Formation**

Shivangani Mahajan<sup>1,3</sup> and Sanghapal D. Sawant\*<sup>1,2,3</sup>

<sup>1</sup>*Natural Products and Medicinal Chemistry Division, CSIR-Indian Institute of Integrative Medicine, Jammu-180001, India.*

<sup>2</sup>*Organic Chemistry Division, CSIR-National Chemical Laboratory, Pune, 411008, India.*

<sup>3</sup>*Academy of Scientific and Innovative Research (AcSIR), Ghaziabad-201002, India.*

### **Table of Contents**

| <b>S.No</b> | <b>Details</b>                                                               | <b>Page No</b> |
|-------------|------------------------------------------------------------------------------|----------------|
| 1.          | Optimization studies for N-(methoxy(aryl)methyl)-2-nitrobenzamide (5a-5c)    | S2-S4          |
| 2.          | Optimization studies for 2-(aryl)-4,5-diphenyl-1 <i>H</i> -imidazole (7a-7b) | S5-S6          |
| 3.          | References                                                                   | S7             |
| 4.          | NMR and HRMS Spectra                                                         | S8-S75         |

## 1. Optimization studies for *N*-(methoxy(aryl)methyl)-2-nitrobenzamide (**5a-5c**):

In accordance with the findings from literature report 1c, our experimentation initiated with the utilization of a commercial formaldehyde solution and 2-nitrobenzamide in the presence of copper sulfate and potassium carbonate, along with the ligand TMEDA in methanol solvent, to assess the viability of the reaction<sup>1</sup>. Over a period of time, the anticipated product **5aa** was successfully observed. Subsequently, we sought to investigate the reaction outcome by substituting the ligand TMEDA with our compound **3a (L)**. Gratifyingly, the use of ligand **L** resulted in the formation of another major product, **5a (Table S1)**.

Encouraged by this outcome, we systematically optimized the reaction conditions (**Table S2**).

Initially, we identified copper(I) chloride as the most effective catalyst when paired with potassium carbonate as the base under reflux conditions, surpassing other copper catalysts. Further optimization led us to discover that caesium carbonate outperformed other bases. Subsequent optimization efforts focused on reaction time, revealing that a 10-hour duration yielded the best results whereas stirring the reaction for less or more hours yielded comparatively less yield. Temperature variations were explored, with room temperature showing no product formation and 50°C resulting in a lower yield of the desired product **5a**. Additionally, conducting the reaction in other solvent Ethanol (Table S2, entry 13) and without ligand **L** (entry 14) failed to produce the desired product **5a** in both cases. After careful consideration of all the results, entry 10 in table S2 was determined as the optimal condition for the reaction. Applying the same optimized conditions to benzaldehyde and 4-chloro benzaldehyde, we successfully obtained the desired corresponding products, **5b** and **5c**, in 8 hours.

**Table S1: Synthesis of *N*-(methoxy(aryl)methyl)-2-nitrobenzamide**

a) Synthesis of *N*-(methoxymethyl)-2-nitrobenzamide<sup>a</sup>

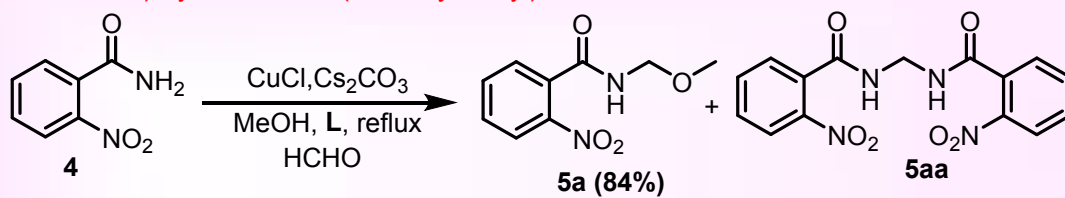

b) Synthesis of *N*-(methoxy(aryl)methyl)-2-nitrobenzamide<sup>b</sup>

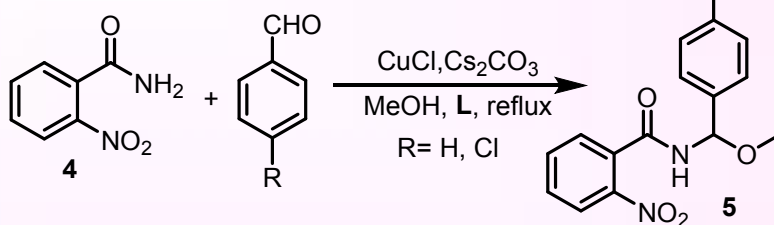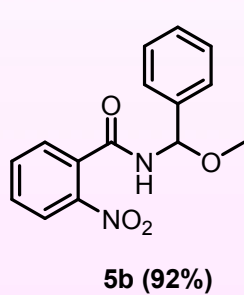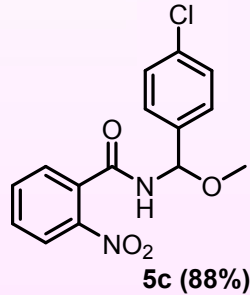

- <sup>[a]</sup>Reaction Conditions: **4** (0.30 mmol), **HCHO** (1.0 mL),  $\text{CuCl}$  (10 mol%),  $\text{Cs}_2\text{CO}_3$  (0.45 mmol),  $\text{L}$  (5 mol%),  $\text{MeOH}$  (1.0 mL),  
<sup>[b]</sup>Reaction Conditions: **4** (0.30 mmol), **ArCHO** (0.30 mmol),  $\text{CuCl}$  (10 mol%),  $\text{Cs}_2\text{CO}_3$  (0.45 mmol),  $\text{L}$  (5 mol%),  $\text{MeOH}$  (1.0 mL)

**Table S2: Optimization Studies for *N*-(methoxymethyl)-2-nitrobenzamide<sup>[a]</sup>**

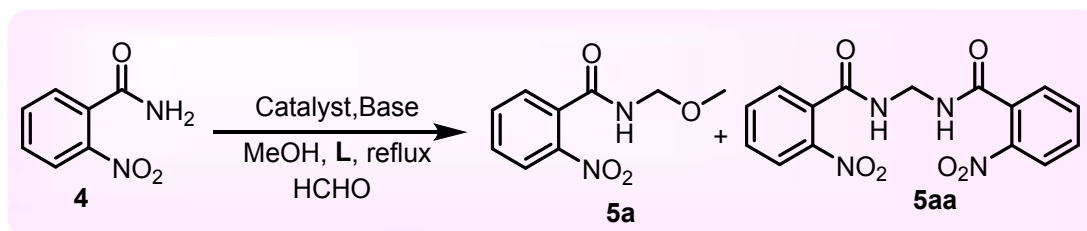

| S.No.             | Catalyst                               | Base                            | Reaction temp (°C) | Reaction time (h) | Product 5a (% Yield) <sup>b</sup> | Product 5aa (% Yield) <sup>b</sup> |
|-------------------|----------------------------------------|---------------------------------|--------------------|-------------------|-----------------------------------|------------------------------------|
| 1                 | CuSO <sub>4</sub> ·5H <sub>2</sub> O   | K <sub>2</sub> CO <sub>3</sub>  | reflux             | 6                 | 52                                | 31                                 |
| 2                 | CuI                                    | K <sub>2</sub> CO <sub>3</sub>  | reflux             | 6                 | 47                                | 32                                 |
| 3                 | CuCl                                   | K <sub>2</sub> CO <sub>3</sub>  | reflux             | 6                 | 56                                | 34                                 |
| 4                 | CuCl <sub>2</sub>                      | K <sub>2</sub> CO <sub>3</sub>  | reflux             | 6                 | 52                                | 30                                 |
| 5                 | Cu(OAc) <sub>2</sub> ·H <sub>2</sub> O | K <sub>2</sub> CO <sub>3</sub>  | reflux             | 6                 | 50                                | 33                                 |
| 6                 | CuCl                                   | KOH                             | reflux             | 6                 | 42                                | 45                                 |
| 7                 | CuCl                                   | NaOH                            | reflux             | 6                 | 41                                | 46                                 |
| 8                 | CuCl                                   | CS <sub>2</sub> CO <sub>3</sub> | reflux             | 6                 | 69                                | 21                                 |
| 9                 | CuCl                                   | CS <sub>2</sub> CO <sub>3</sub> | reflux             | 8                 | 78                                | 14                                 |
| 10                | CuCl                                   | CS <sub>2</sub> CO <sub>3</sub> | reflux             | 10                | 84                                | 10                                 |
| 11                | CuCl                                   | CS <sub>2</sub> CO <sub>3</sub> | reflux             | 12                | 80                                | 12                                 |
| 12 <sup>[c]</sup> | CuCl                                   | CS <sub>2</sub> CO <sub>3</sub> | reflux             | 10                | 0                                 | 78                                 |
| 13 <sup>[d]</sup> | CuCl                                   | CS <sub>2</sub> CO <sub>3</sub> | reflux             | 10                | 0                                 | 37                                 |
| 14                | CuCl                                   | CS <sub>2</sub> CO <sub>3</sub> | rt                 | 10                | NR                                | 27                                 |
| 15                | CuCl                                   | CS <sub>2</sub> CO <sub>3</sub> | 50                 | 10                | 57                                | 31                                 |

<sup>[a]</sup>Reaction Conditions: **4** (0.30 mmol), **HCHO** (1.0 mL), catalyst (10 mol%), base (0.45 mmol), L (5 mol%), MeOH (1.0 mL), <sup>[b]</sup>Isolated Yield, <sup>[c]</sup>EtOH (1.0 mL), <sup>[d]</sup>Without ligand L

## 2. Optimization studies for 2-(aryl)-4,5-diphenyl-1H-imidazole (7a-7b):

Similarly, to broaden the scope of the ligand's influence, we conducted the synthesis of 2-(aryl)-4,5-diphenyl-1H-imidazole<sup>2</sup> based on literature report 2b.

**Table S3: Synthesis of 2-(aryl)-4,5-diphenyl-1H-imidazole<sup>[a]</sup>**

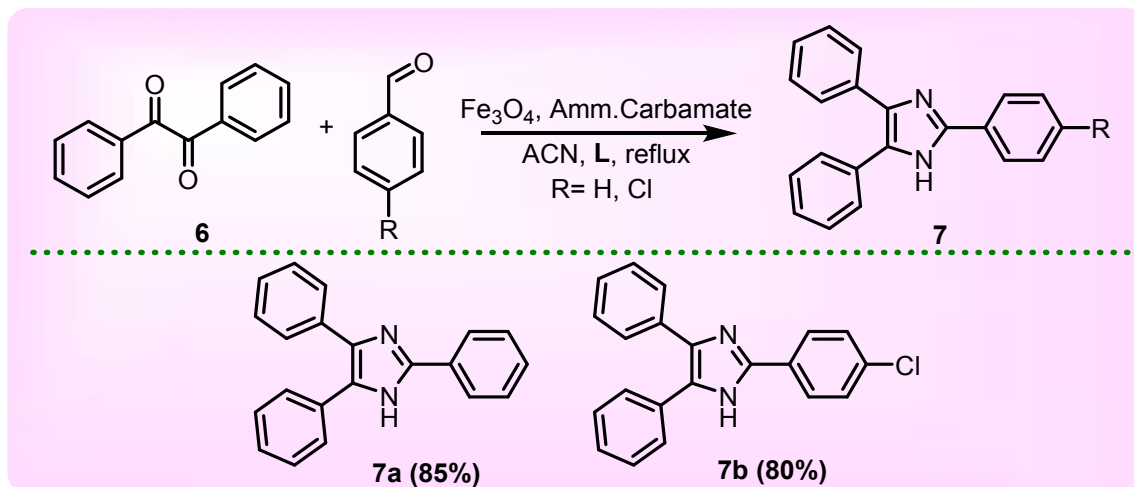

<sup>[a]</sup>Reaction Conditions: **6** (0.24 mmol), **ArCHO** (0.24 mmol), Fe<sub>3</sub>O<sub>4</sub> (10 mol%), Ammonium Carbamate (0.48 mmol), L (10 mol%), ACN (1.0 mL)

The initial reaction involving benzil and benzaldehyde, with Fe<sub>3</sub>O<sub>4</sub> as the catalyst and ammonium carbamate as the ammonium source in MeOH under reflux without ligand L, yielded minimal product **7a**. Despite extending the reaction time to over 20 hours, the desired product was obtained in meager quantities. Consequently, optimization efforts were undertaken to improve the yield (**Table S4**). Among various iron catalysts explored, Fe<sub>3</sub>O<sub>4</sub> emerged as the most effective. The introduction of ligand **L** significantly enhanced the yield, highlighting the positive influence of the ligand on the reaction. Subsequent screening of solvents revealed that acetonitrile (ACN) outperformed others, and stirring the reaction without solvent also confirmed its efficacy. Room temperature conditions resulted in no product formation, while at 60°C, a lower yield was observed compared to reflux conditions. Further optimization included determining the optimal reaction time, with 4 hours identified as yielding the maximum product. Additionally, alternative ammonium sources were explored, ultimately selecting ammonium carbamate as the most effective. With the optimized conditions in hand (entry 12, Table S4), the 4-chlorobenzaldehyde yielded the corresponding desired product **7b** in good yield.

**Table S4: Optimization Studies for 2-phenyl-4,5-diphenyl-1H-imidazole<sup>[a]</sup>**

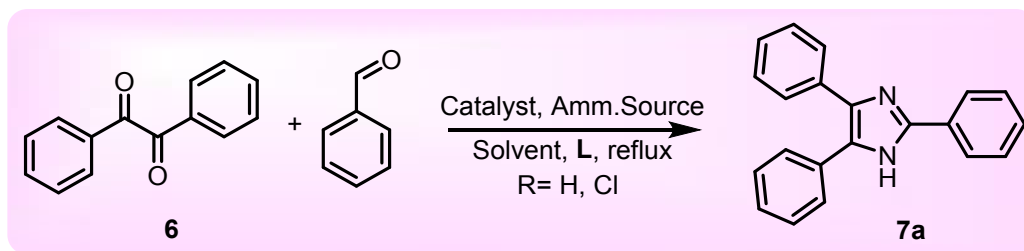

| S.No.            | Catalyst                             | Solvent    | Ammonium Source      | Reaction temp (°C) | Reaction time (h) | Product 7a (% Yield) <sup>b</sup> |
|------------------|--------------------------------------|------------|----------------------|--------------------|-------------------|-----------------------------------|
| 1 <sup>[c]</sup> | Fe <sub>3</sub> O <sub>4</sub>       | MeOH       | Amm.carbamate        | reflux             | 3                 | 13                                |
| 2 <sup>[c]</sup> | Fe <sub>2</sub> O <sub>3</sub>       | MeOH       | Amm.carbamate        | reflux             | 3                 | 7                                 |
| 3 <sup>[c]</sup> | FeO                                  | MeOH       | Amm.carbamate        | reflux             | 3                 | 9                                 |
| 4 <sup>[c]</sup> | FeCl <sub>3</sub> ·6H <sub>2</sub> O | MeOH       | Amm.carbamate        | reflux             | 3                 | Traces                            |
| 5                | Fe <sub>3</sub> O <sub>4</sub>       | MeOH       | Amm.carbamate        | reflux             | 3                 | 61                                |
| 6                | Fe <sub>3</sub> O <sub>4</sub>       | ACN        | Amm.carbamate        | reflux             | 3                 | 74                                |
| 7                | Fe <sub>3</sub> O <sub>4</sub>       | Toluene    | Amm.carbamate        | reflux             | 3                 | 70                                |
| 8                | Fe <sub>3</sub> O <sub>4</sub>       | Dioxane    | Amm.carbamate        | reflux             | 3                 | 68                                |
| 9                | Fe <sub>3</sub> O <sub>4</sub>       | -          | Amm.carbamate        | 100                | 3                 | 60                                |
| 10               | Fe <sub>3</sub> O <sub>4</sub>       | ACN        | Amm.carbamate        | rt                 | 3                 | -                                 |
| 11               | Fe <sub>3</sub> O <sub>4</sub>       | ACN        | Amm.carbamate        | 60                 | 3                 | 67                                |
| <b>12</b>        | <b>Fe<sub>3</sub>O<sub>4</sub></b>   | <b>ACN</b> | <b>Amm.carbamate</b> | <b>reflux</b>      | <b>4</b>          | <b>85</b>                         |
| 13               | Fe <sub>3</sub> O <sub>4</sub>       | ACN        | Amm.carbamate        | reflux             | 5                 | 79                                |
| 14               | Fe <sub>3</sub> O <sub>4</sub>       | ACN        | Amm.carbonate        | reflux             | 4                 | 78                                |
| 15               | Fe <sub>3</sub> O <sub>4</sub>       | ACN        | Liq Ammonia          | reflux             | 4                 | 69                                |

<sup>[a]</sup>Reaction Conditions: **6** (0.24 mmol), **PhCHO** (0.24 mmol), catalyst (10 mol%), Ammonium Source (0.48 mmol), L (10 mol%), Solvent (1.0 mL), <sup>[b]</sup>Isolated Yield, <sup>[c]</sup>Without ligand L

### 3. Refernces:

1. (a) Halli, J.; Hofman, K.; Beisel, T.;Manolikakes, G.Synthesis of N-Acyl-N, O-acetals from Aldehydes, Amides and Alcohols. *Eur. J. Org. Chem.* **2015**, *2015*, 4624-4627. (b) Tan, B.Y.H.; Teo, Y.C. Efficient cobalt-catalyzed C–N cross-coupling reaction between benzamide and aryl iodide in water. *Org.Biomol. Chem.* **2014**, *12*, 7478-7481. (c) Panda, N.;Mothkuri, R.; Nayak, D.K. Copper-Catalyzed Regioselective Synthesis of N-Aryl Amides from Aldoximes and Aryl Halides. *Eur. J. Org. Chem.* **2014**, *2014*,1602-1605.
2. (a) Sohail, M.; Bilal, M.; Maqbool, T.; Rasool, N.; Ammar, M.; Mahmood, S.; Malik, A.; Zubair, M.; Ashraf, G.A. Iron-catalyzed synthesis of N-heterocycles via intermolecular and intramolecular cyclization reactions: A review. *Arab. J. Chem.* **2022**, *15*, 104095. (b) Hosseini, S.; Kiasat, A. R.; Farhadi, A.  $\text{Fe}_3\text{O}_4@ \text{SiO}_2$ /Bipyridinium Nanocomposite as a Magnetic and Recyclable Heterogeneous Catalyst for the Synthesis of Highly Substituted Imidazoles Via Multi-Component Condensation Strategy. *PolycyclAromat Compd.* **2021**, *41*, 762-771.

#### 4. NMR and HRMS Spectra

##### $^1\text{H-NMR}$ (400 MHz, $\text{CDCl}_3$ ) of **3a**

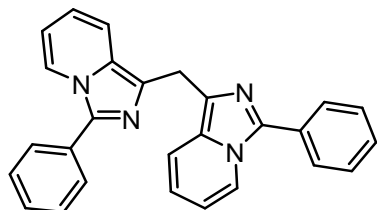

8.16  
7.79  
7.78  
7.76  
7.54  
7.52  
7.51  
7.49  
7.47  
7.41  
7.39  
7.38  
7.26  
6.59  
6.58  
6.57  
6.56  
6.47  
6.47  
6.45  
6.44  
6.44  
4.68

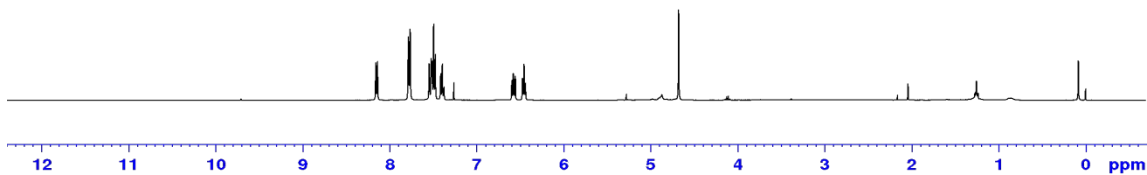

##### $^{13}\text{C}\{^1\text{H}\}$ -NMR (101 MHz, $\text{CDCl}_3$ ) of **3a**

136.51  
131.17  
130.47  
129.03  
128.53  
128.33  
128.06  
115.14  
113.14  
111.66  
113.18

2.10  
2.11

77.47  
77.16  
76.84

27.18

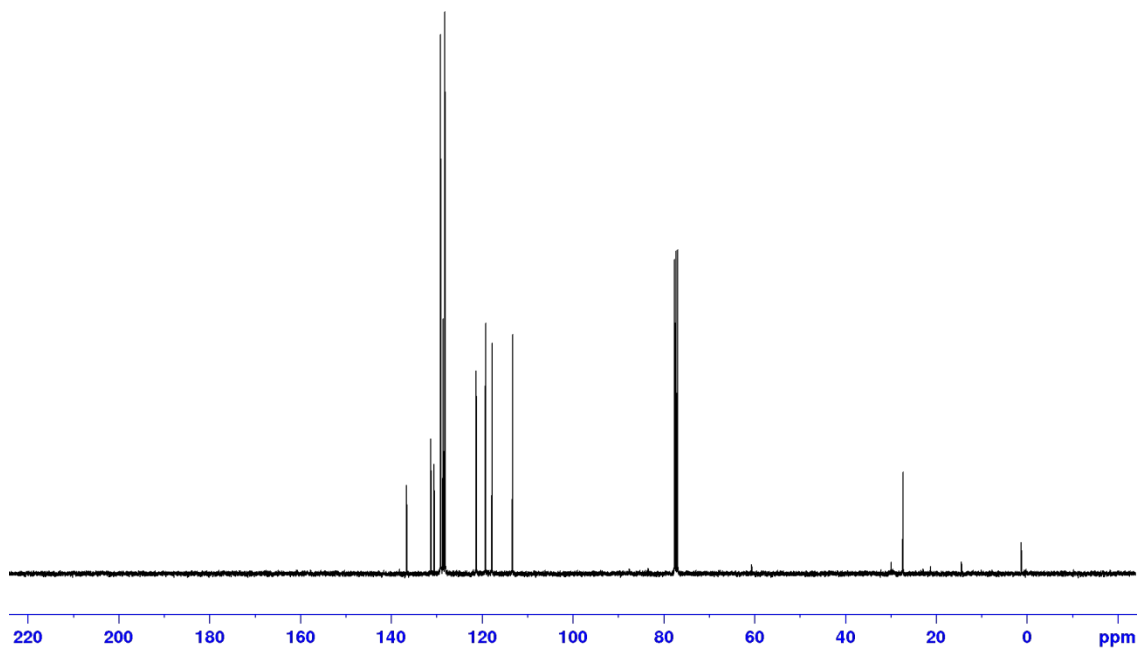



DEPT-135 (101 MHz, CDCl<sub>3</sub>) of 3a

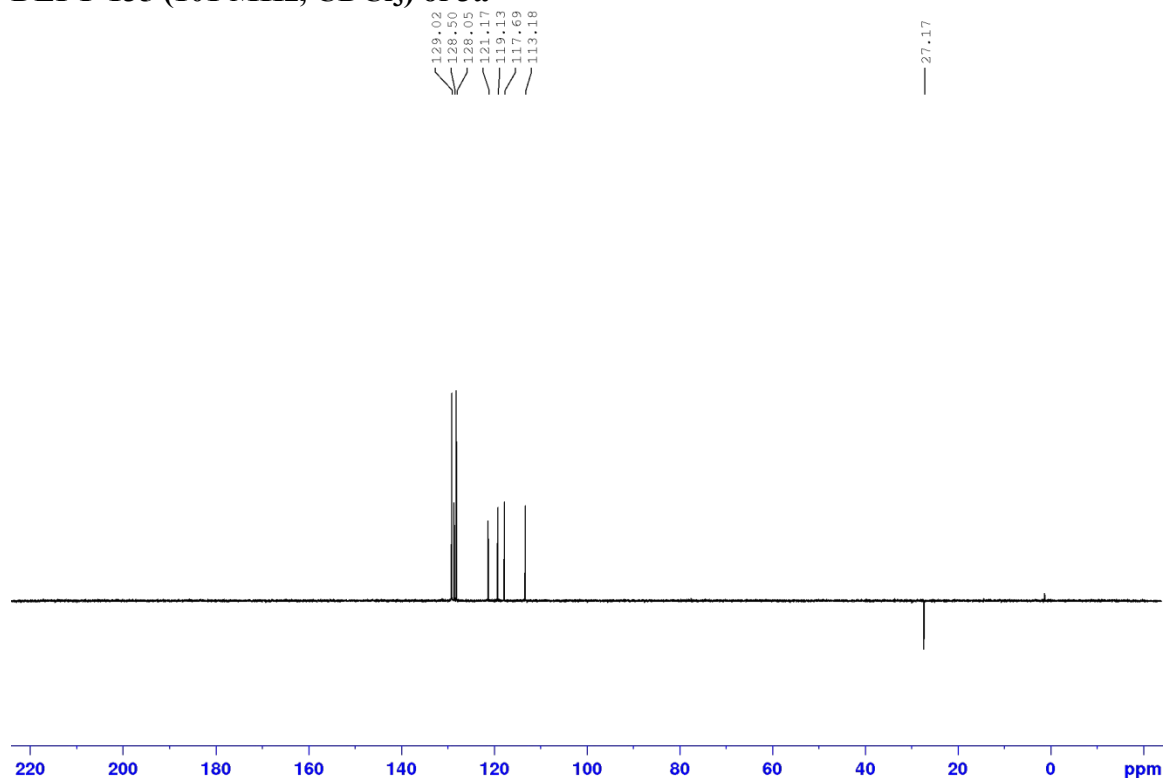

HRMS of 3a

Elemental Composition Report

Page 1

Single Mass Analysis

Tolerance = 3.0 PPM / DBE: min = -1.5, max = 50.0

Element prediction: Off

Number of isotope peaks used for i-FIT = 3

Monoisotopic Mass, Even Electron Ions

58 formula(e) evaluated with 1 results within limits (up to 3 closest results for each mass)

Elements Used:

C: 0-33 H: 0-200 B: 0-1 N: 0-4

SM-294 (A)

QMI DIVISION, CSIR-IIIM JAMMU  
Xevo G2-XS QTOF YFC2015

14-Sep-2021

11:34:33

1: TOF MS ES+

1.48e+006

140921\_07 15 (0.310) Cm (15:16)

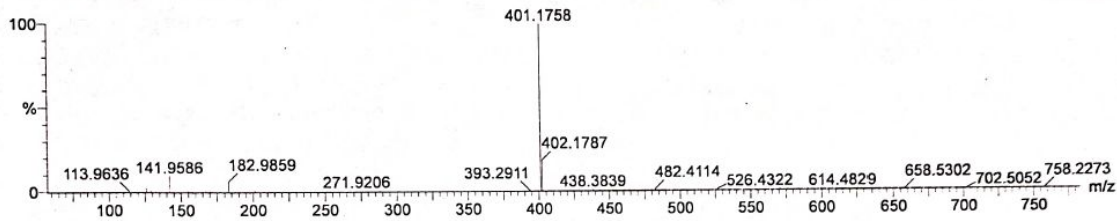

Minimum: -1.5  
Maximum: 2.0 3.0 50.0

| Mass     | Calc. Mass | mDa  | PPM  | DBE  | i-FIT | Norm | Conf (%) | Formula    |
|----------|------------|------|------|------|-------|------|----------|------------|
| 401.1758 | 401.1766   | -0.8 | -2.0 | 19.5 | 45.1  | n/a  | n/a      | C27 H21 N4 |

### <sup>1</sup>H-NMR (400 MHz, pyridine-d<sub>5</sub>) of 3b

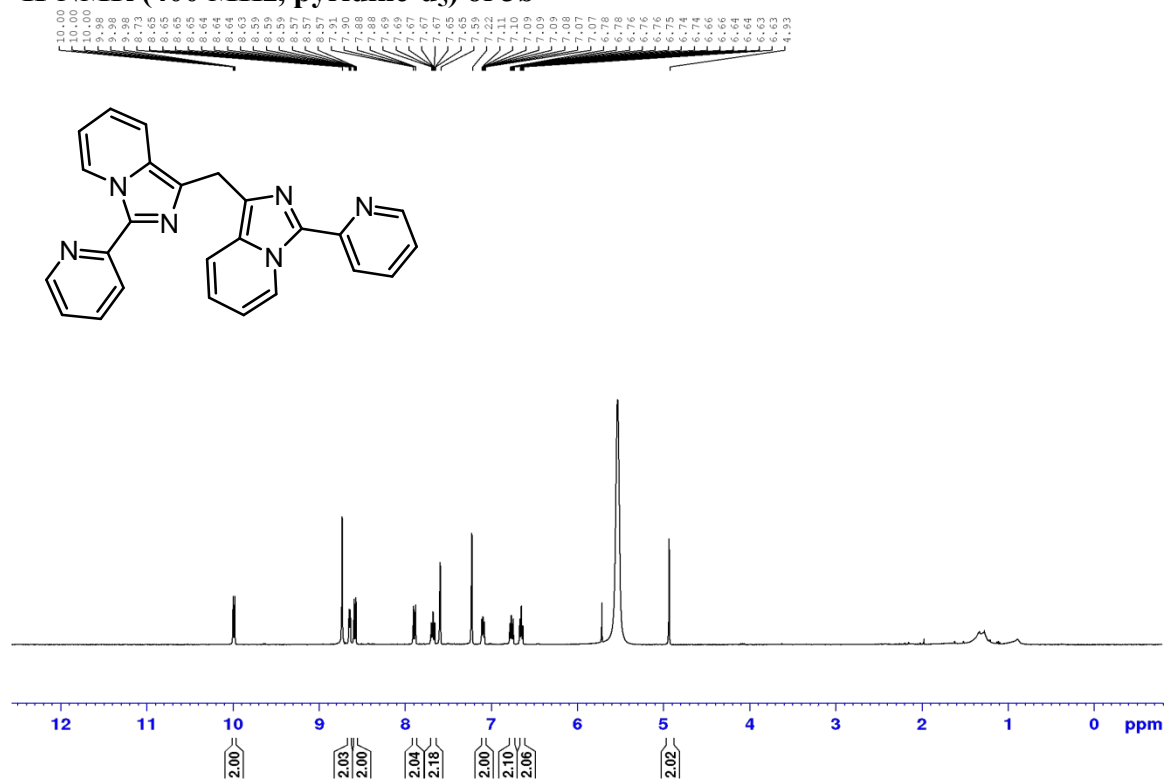

### <sup>13</sup>C{<sup>1</sup>H}-NMR (101 MHz, pyr-d<sub>5</sub>) of 3b

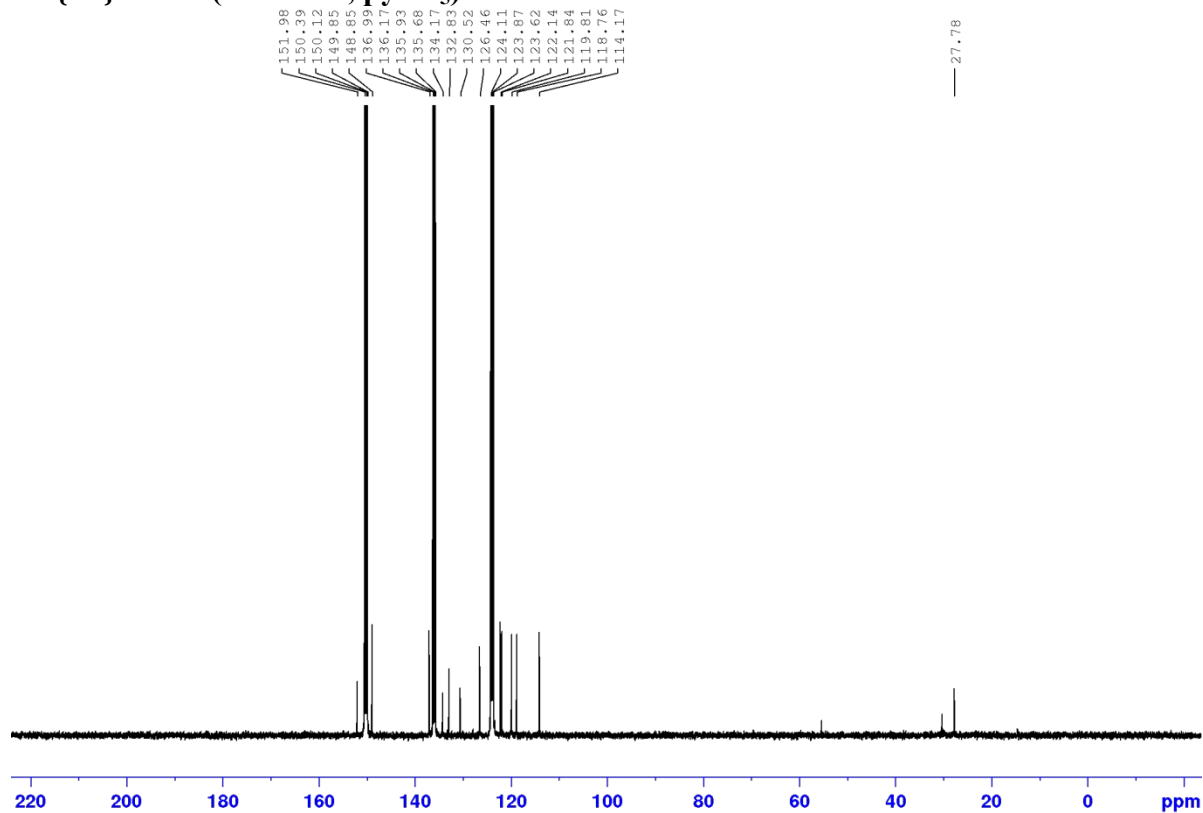

DEPT-135 (101 MHz, pyr-d<sub>5</sub>) of 3b

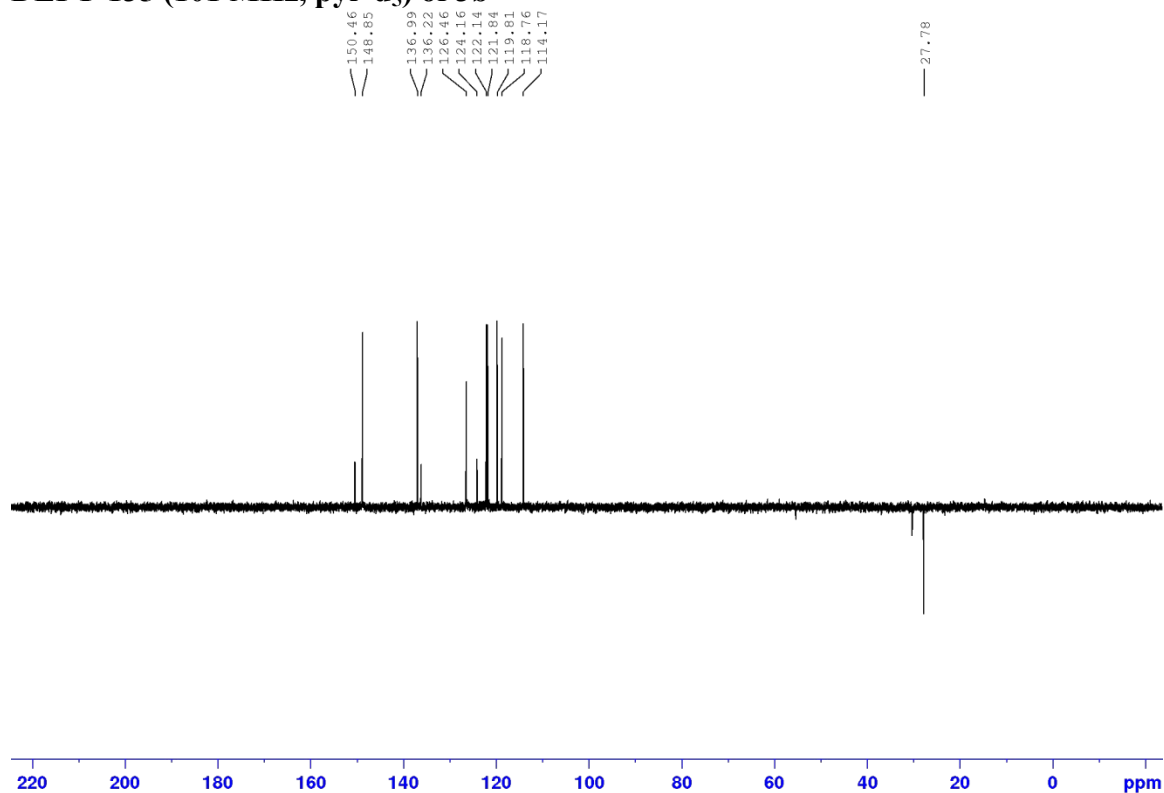

HRMS of 3b

Elemental Composition Report

Single Mass Analysis

Tolerance = 3.0 PPM / DBE: min = -1.5, max = 50.0  
 Element prediction: Off  
 Number of isotope peaks used for i-FIT = 3

Monoisotopic Mass, Even Electron Ions

13 formula(e) evaluated with 1 results within limits (up to 3 closest results for each mass)

Elements Used:

C: 0-25 H: 0-200 N: 0-6

SM-304

QMI DIVISION, CSIR-IIIM JAMMU  
 Xevo G2-XS QTOF YFC2015

12-Oct-2021  
 11:59:00  
 1: TOF MS ES+  
 1.87e+006

121021\_08 12 (0.259) Cm (12:13)

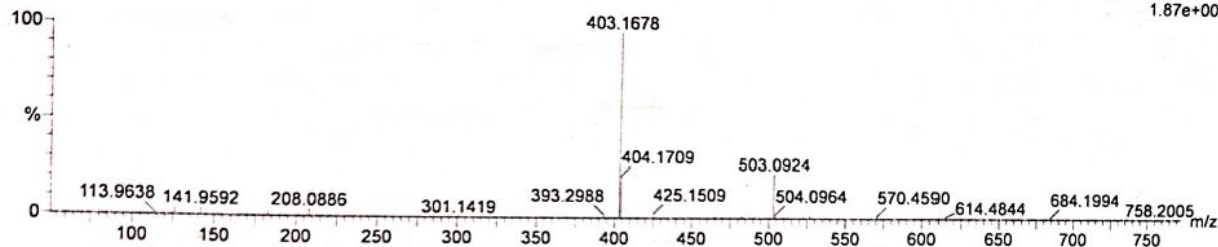

Minimum: -1.5  
 Maximum: 2.0 3.0 50.0

| Mass     | Calc. Mass | mDa | PPM | DBE  | i-FIT | Norm | Conf (%) | Formula    |
|----------|------------|-----|-----|------|-------|------|----------|------------|
| 403.1678 | 403.1671   | 0.7 | 1.7 | 19.5 | 36.7  | n/a  | n/a      | C25 H19 N6 |

**<sup>1</sup>H-NMR (400 MHz, CDCl<sub>3</sub>) of 3c**

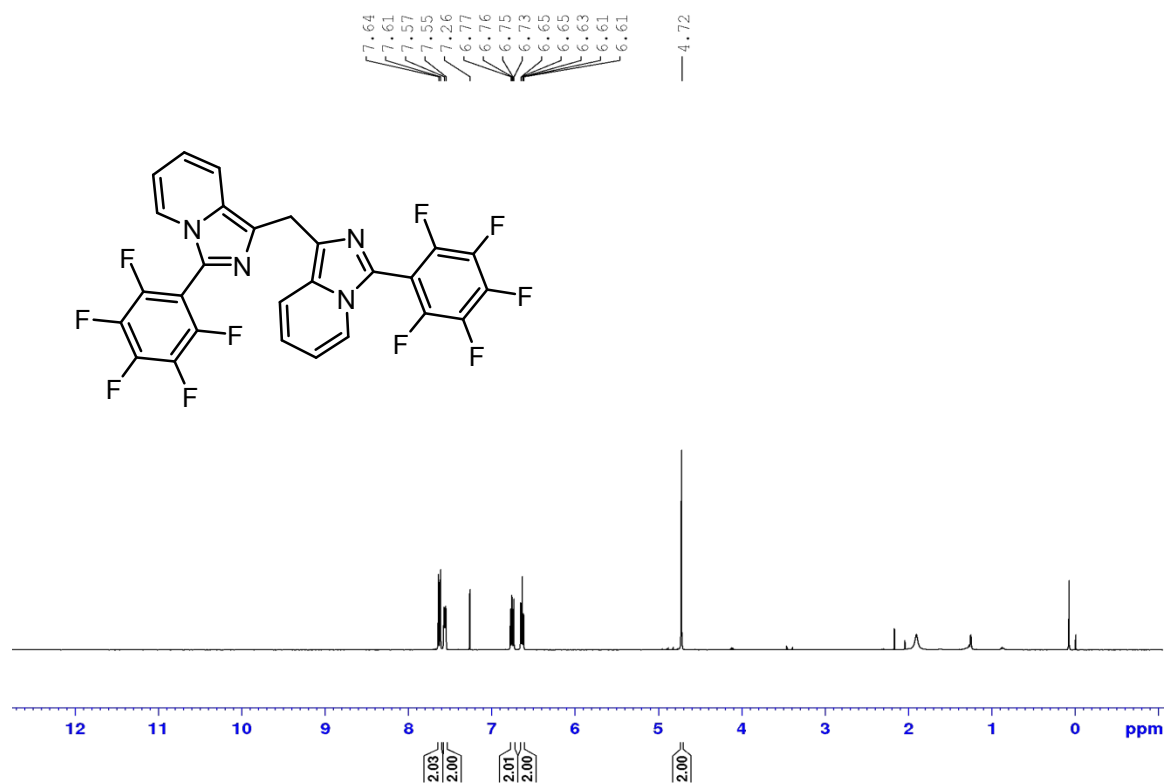

**<sup>13</sup>C{<sup>1</sup>H}-NMR (101 MHz, CDCl<sub>3</sub>) of 3c**

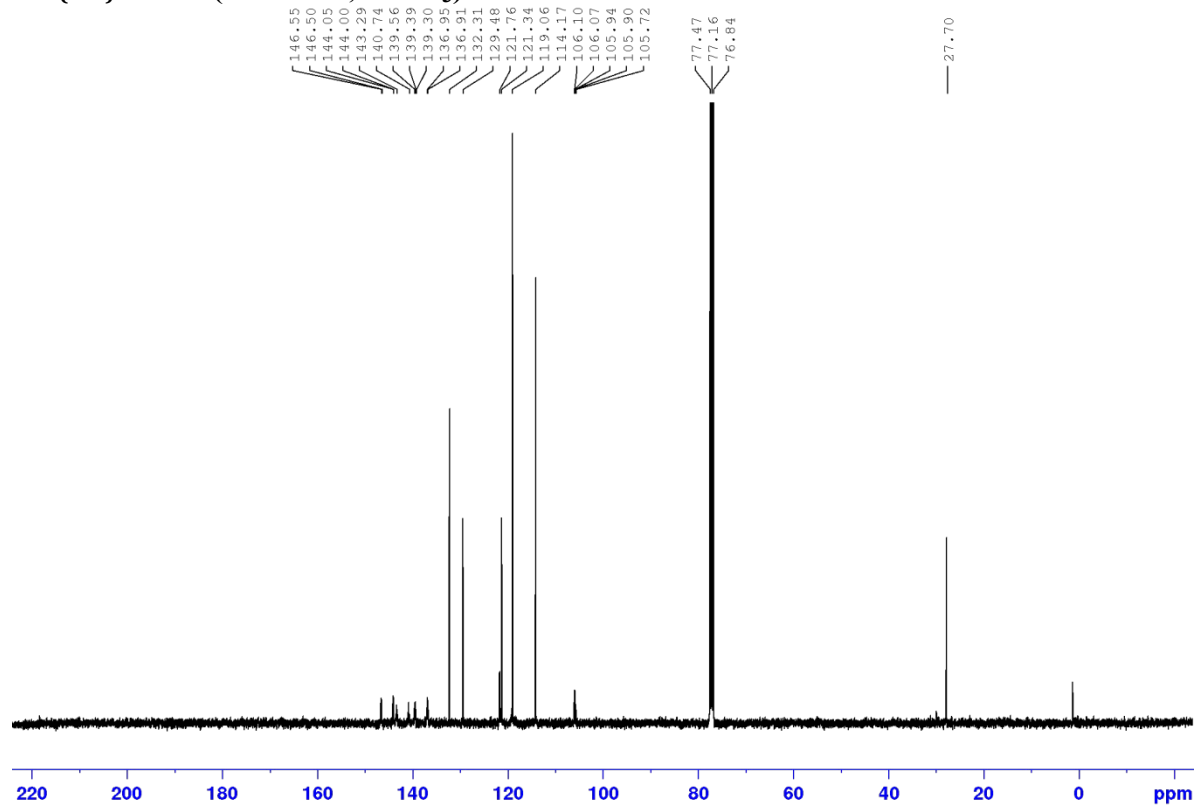

DEPT-135 (101 MHz, CDCl<sub>3</sub>) of 3c

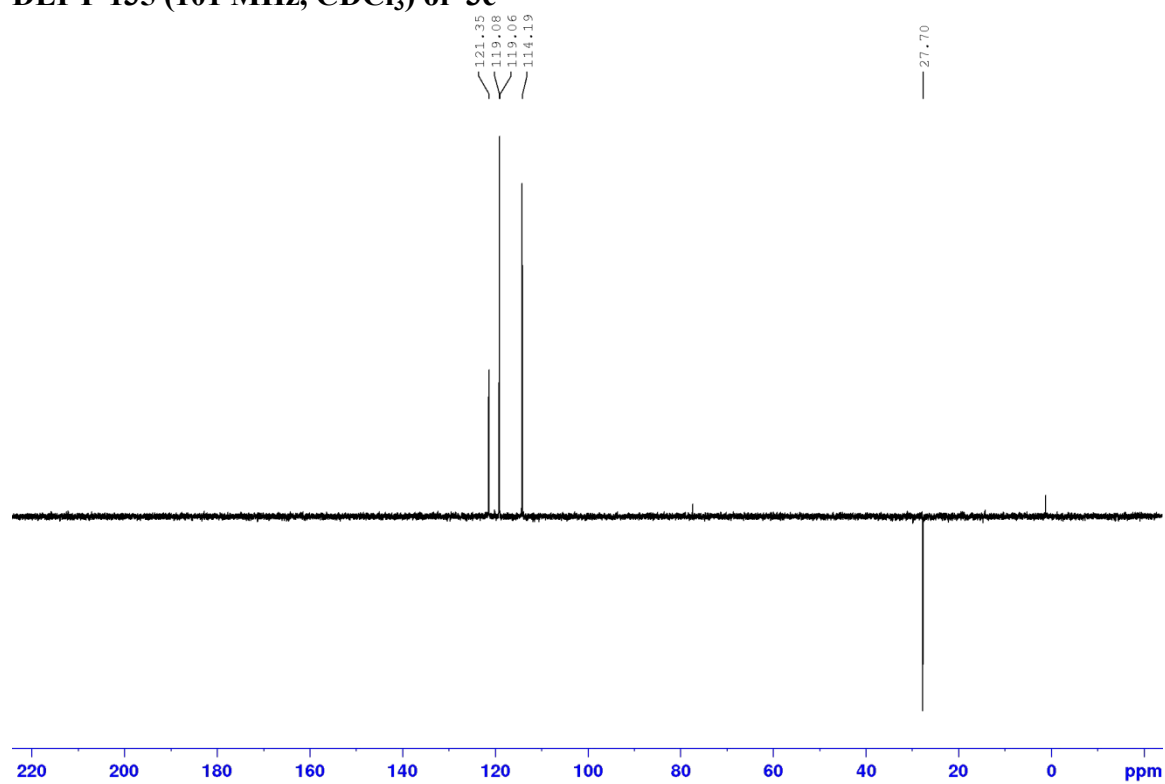

<sup>19</sup>F-NMR (377 MHz, CDCl<sub>3</sub>) of 3c

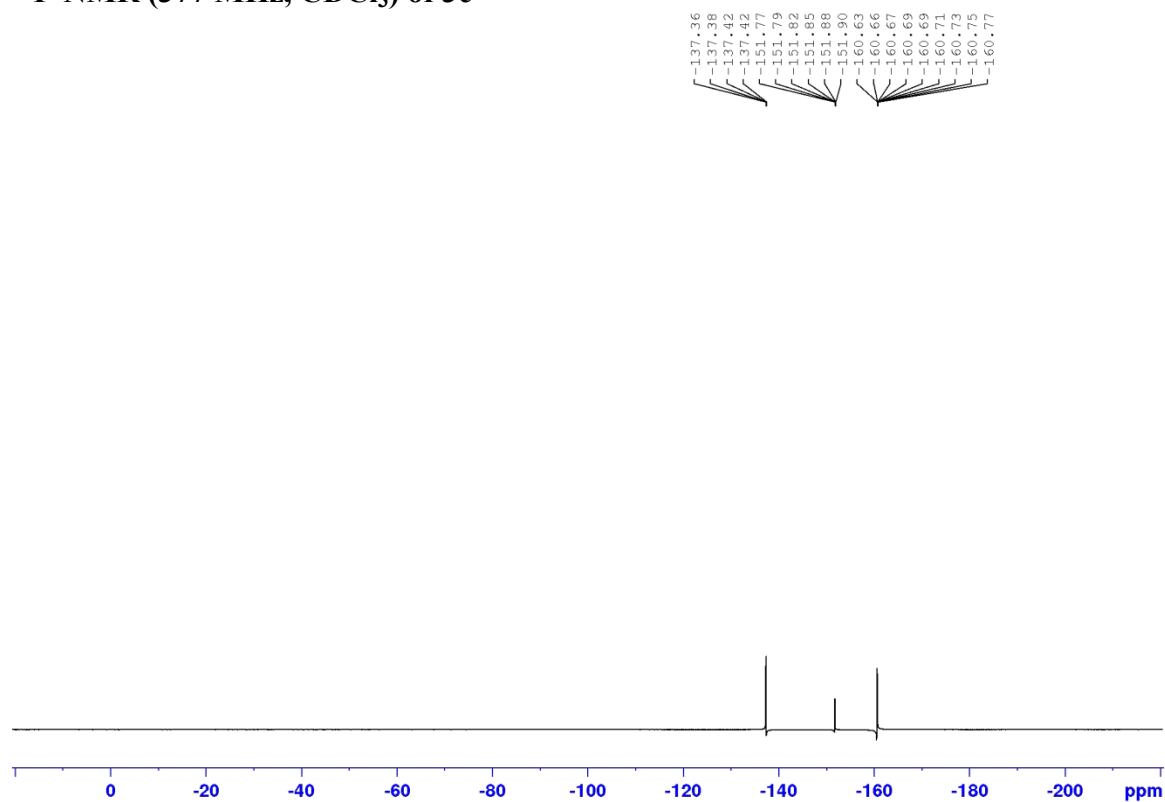

# HRMS of 3c

## Elemental Composition Report

Page 1

### Single Mass Analysis

Tolerance = 3.0 PPM / DBE: min = -1.5, max = 50.0

Element prediction: Off

Number of isotope peaks used for i-FIT = 3

Monoisotopic Mass, Even Electron Ions

64 formula(e) evaluated with 1 results within limits (up to 3 closest results for each mass)

Elements Used:

C: 0-27 H: 0-200 N: 0-4 F: 0-10

SM-305

QMI DIVISION, CSIR-IIIM JAMMU  
Xevo G2-XS QTOF YFC2015

12-Oct-2021

12:04:25

1: TOF MS ES+

7.54e+005

121021\_10 15 (0.310) Cm (15)

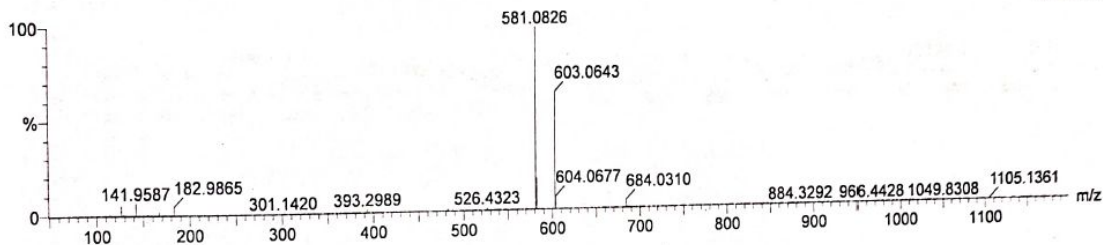

Minimum: -1.5  
Maximum: 2.0 3.0 50.0

| Mass     | Calc. Mass | mDa | PPM | DBE  | i-FIT | Norm | Conf(%) | Formula        |
|----------|------------|-----|-----|------|-------|------|---------|----------------|
| 581.0826 | 581.0824   | 0.2 | 0.3 | 19.5 | 35.6  | n/a  | n/a     | C27 H11 N4 F10 |

## <sup>1</sup>H-NMR (400 MHz, CDCl<sub>3</sub>) of 3d

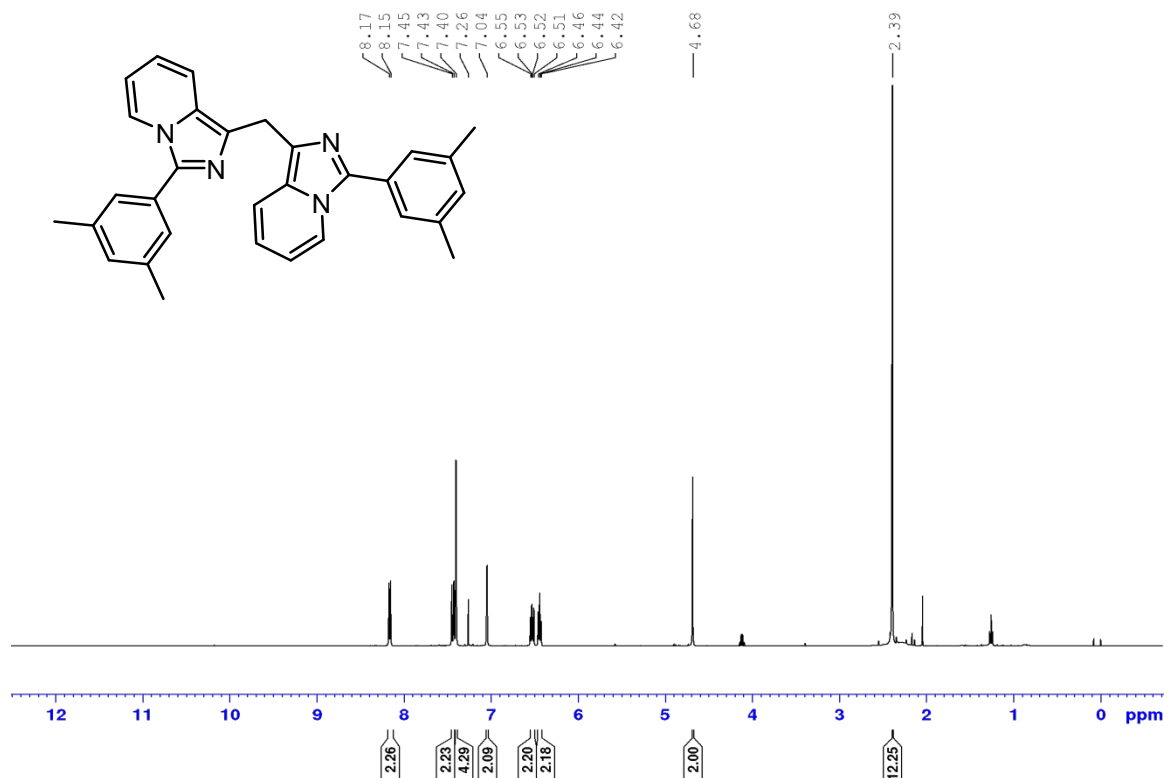

**$^{13}\text{C}\{^1\text{H}\}$ -NMR (101 MHz,  $\text{CDCl}_3$ ) of 3d**

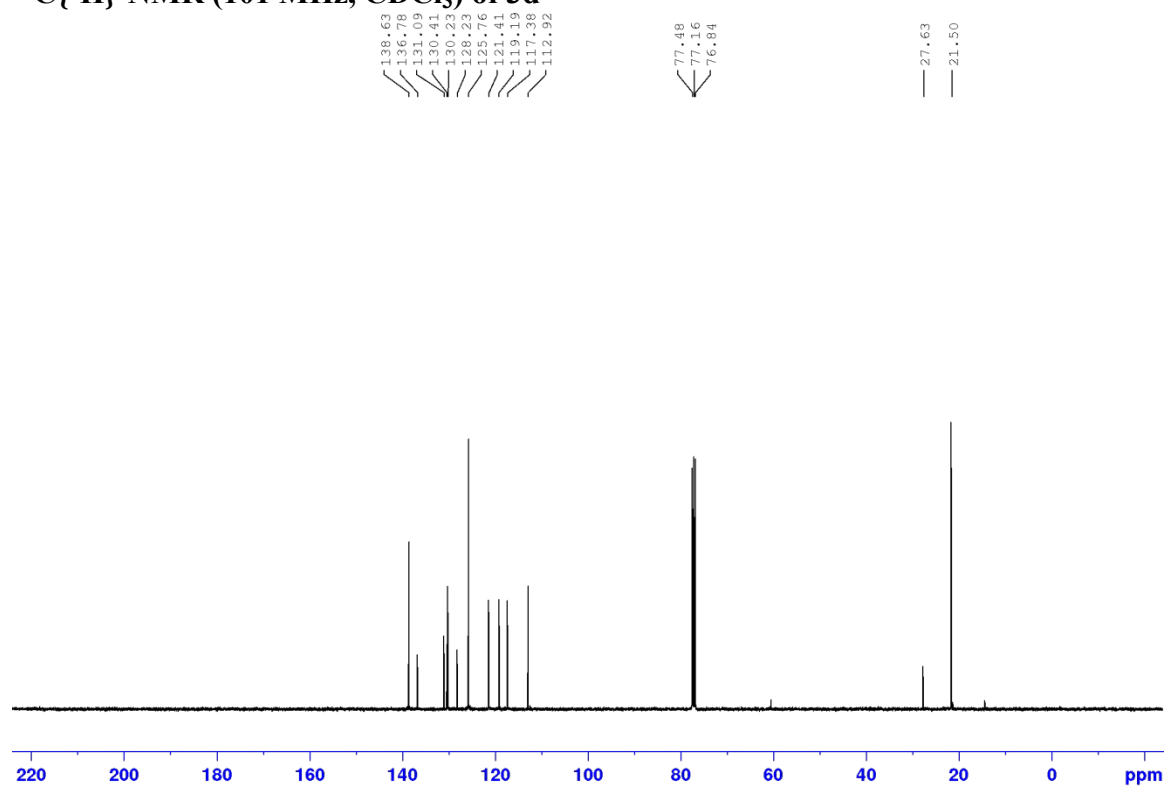

**DEPT-135 (101 MHz,  $\text{CDCl}_3$ ) of 3d**

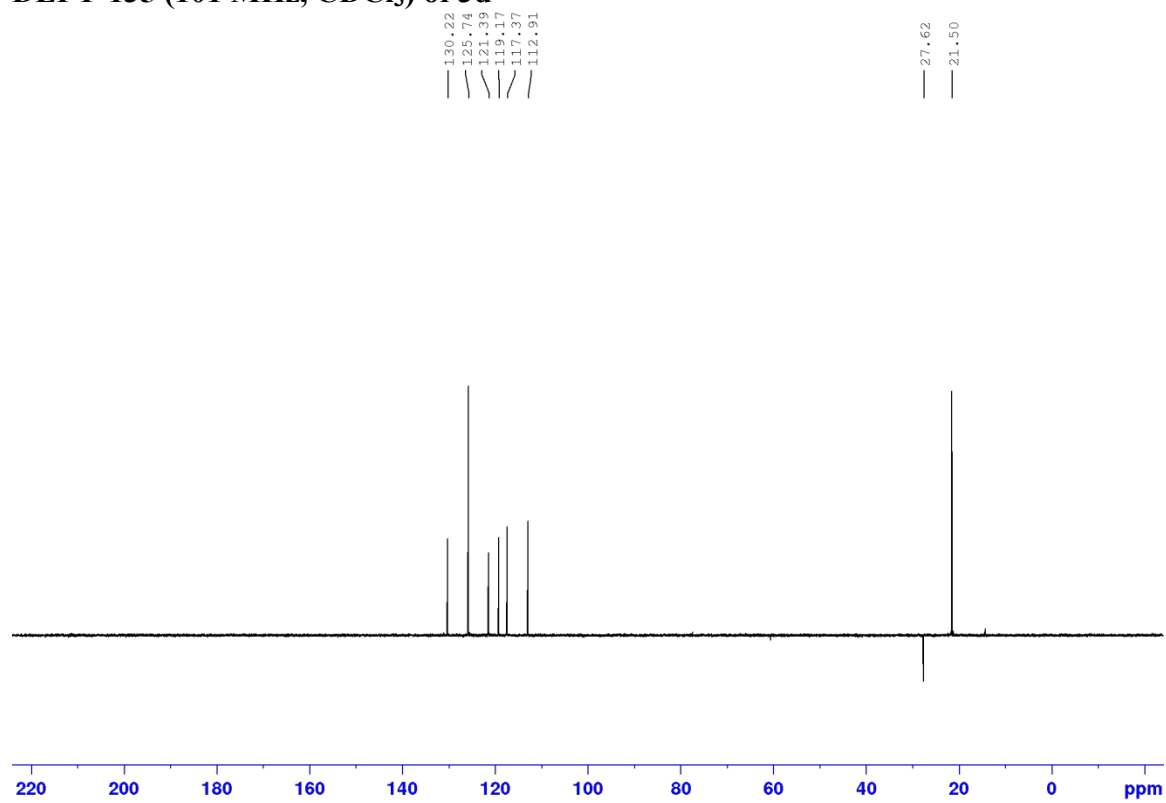

# HRMS of 3d

## Elemental Composition Report

Page 1

### Single Mass Analysis

Tolerance = 3.0 PPM / DBE: min = -1.5, max = 50.0

Element prediction: Off

Number of isotope peaks used for i-FIT = 3

Monoisotopic Mass, Even Electron Ions

22 formula(e) evaluated with 1 results within limits (up to 3 closest results for each mass)

Elements Used:

C: 0-31 H: 0-200 N: 0-6

SM-314

QMI DIVISION, CSIR-IIIM JAMMU  
Xevo G2-XS QTOF YFC2015

12-Oct-2021

12:01:42

1: TOF MS ES+

1.49e+006

121021\_09 14 (0.293) Cm (14:15)

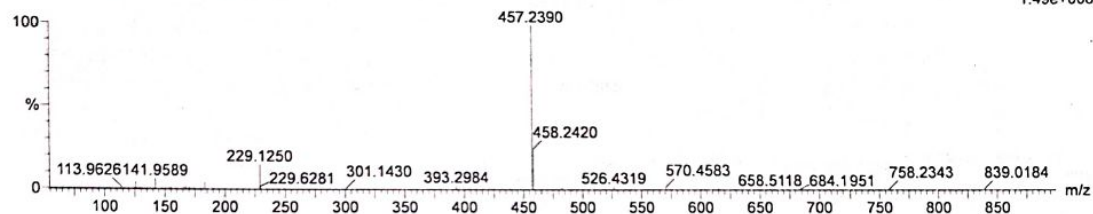

Minimum: -1.5  
Maximum: 2.0 3.0 50.0

| Mass     | Calc. Mass | mDa  | PPM  | DBE  | i-FIT | Norm | Conf(%) | Formula    |
|----------|------------|------|------|------|-------|------|---------|------------|
| 457.2390 | 457.2392   | -0.2 | -0.4 | 19.5 | 41.1  | n/a  | n/a     | C31 H29 N4 |

## <sup>1</sup>H-NMR (400 MHz, CDCl<sub>3</sub>) of 3e

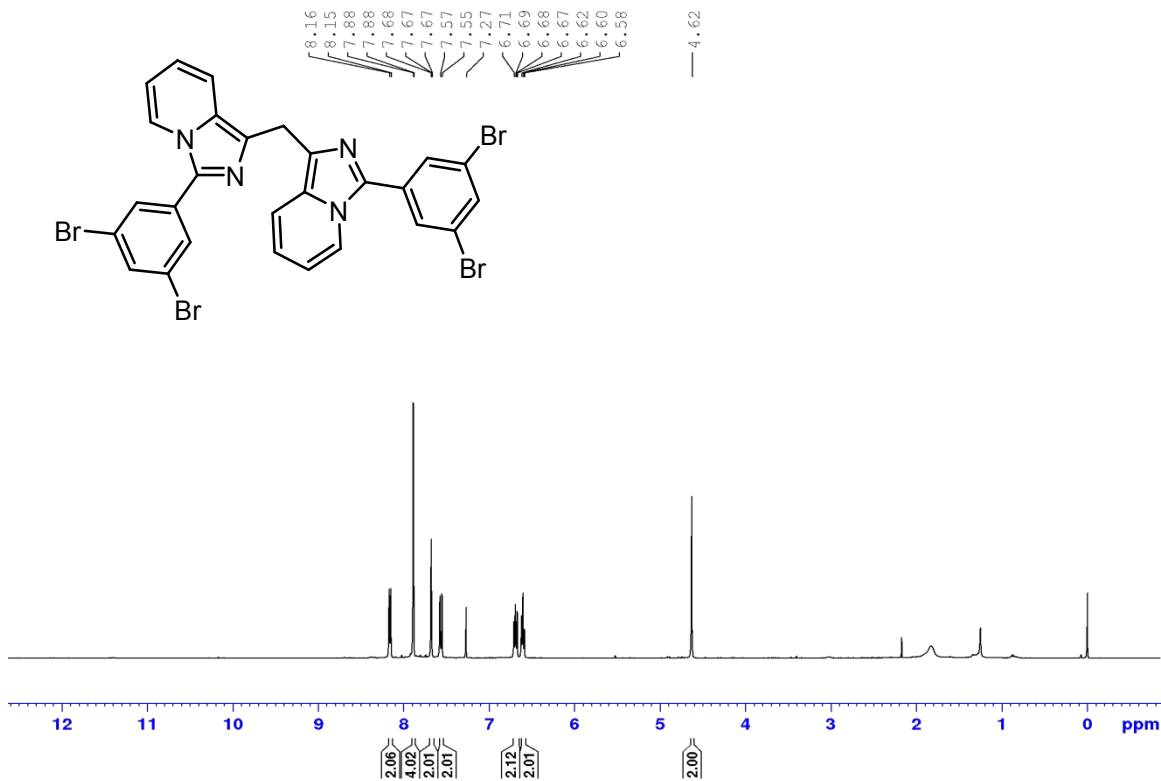



**$^{13}\text{C}\{^1\text{H}\}$ -NMR (101 MHz,  $\text{CDCl}_3$ ) of 3e**

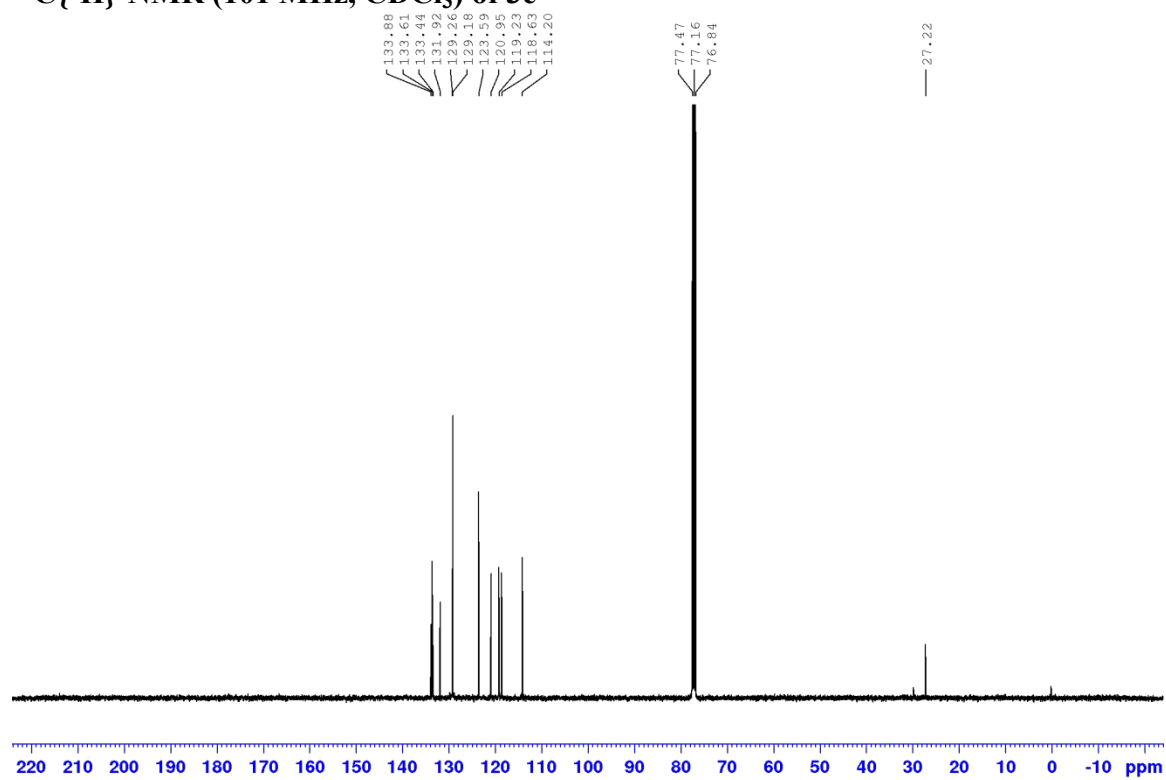

**DEPT-135 (101 MHz,  $\text{CDCl}_3$ ) of 3e**

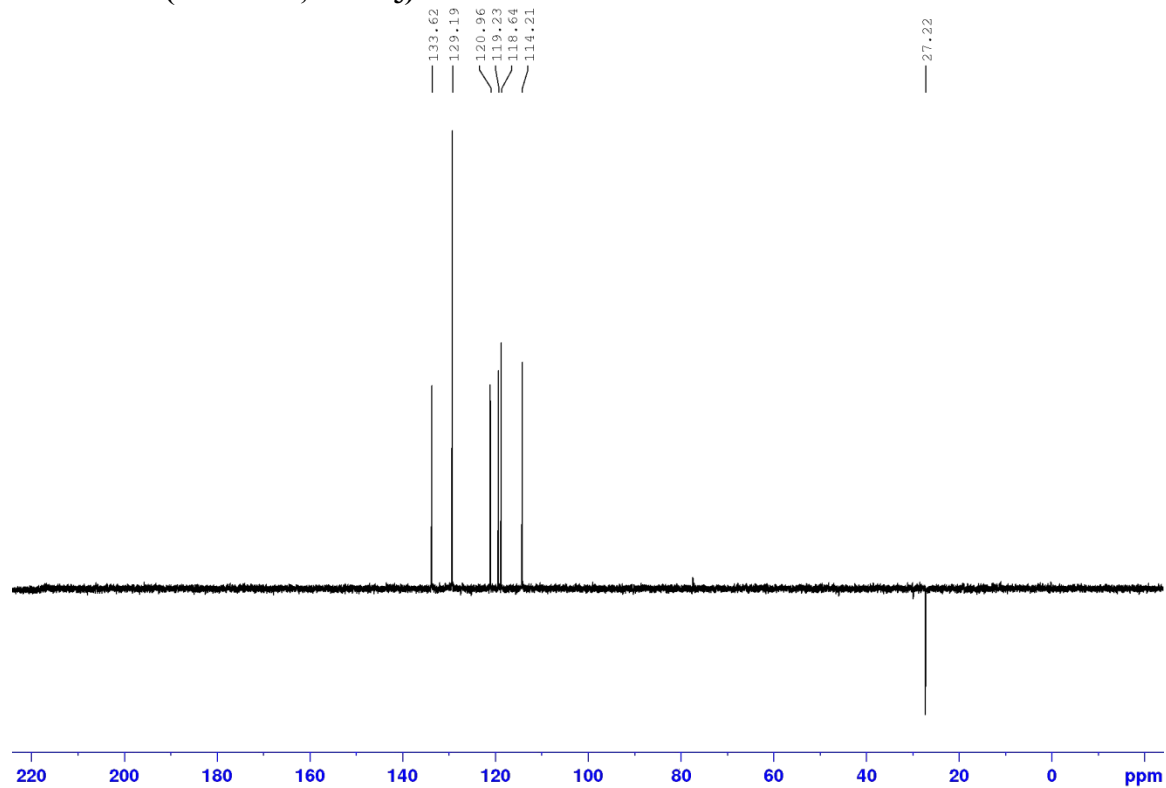

# HRMS of 3e

## Elemental Composition Report

Page 1

### Single Mass Analysis

Tolerance = 50.0 PPM / DBE: min = -1.5, max = 50.0

Element prediction: Off

Number of isotope peaks used for i-FIT = 3

Monoisotopic Mass, Even Electron Ions

31 formula(e) evaluated with 1 results within limits (up to 3 closest results for each mass)

Elements Used:

C: 0-27 H: 0-100 N: 0-4 Br: 0-4

SM-369

QMI DIVISION, CSIR-IIIM JAMMU  
Xevo G2-XS QTOF YFC2015

30-Aug-2022

12:09:56

1: TOF MS ES+

1.46e+006

300822\_21 6 (0.138)

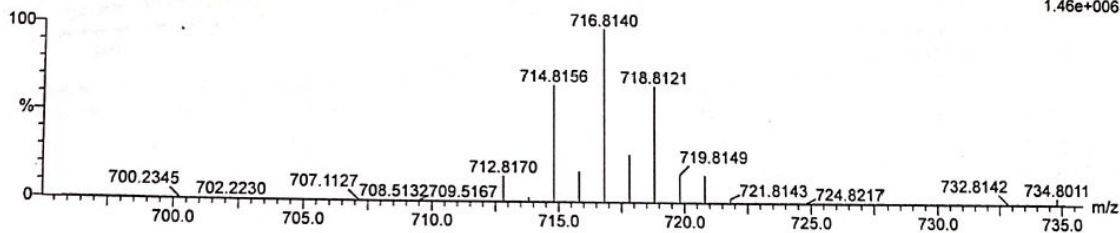

Minimum: -1.5  
Maximum: 2.0 50.0 50.0

| Mass     | Calc. Mass | mDa  | PPM  | DBE  | i-FIT | Norm | Conf (%) | Formula        |
|----------|------------|------|------|------|-------|------|----------|----------------|
| 712.8170 | 712.8187   | -1.7 | -2.4 | 19.5 | 596.3 | n/a  | n/a      | C27 H17 N4 Br4 |

## <sup>1</sup>H-NMR (400 MHz, CDCl<sub>3</sub>) of 3f

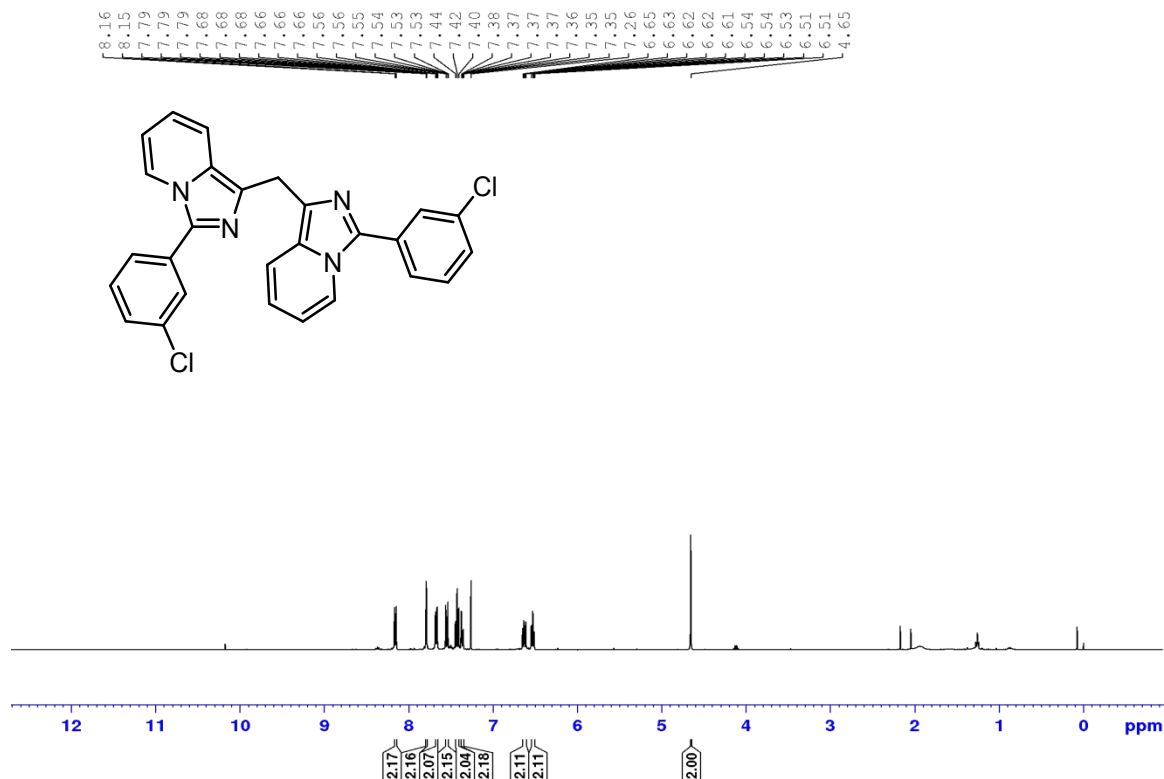

**$^{13}\text{C}\{^1\text{H}\}$ -NMR (101 MHz,  $\text{CDCl}_3$ ) of 3f**

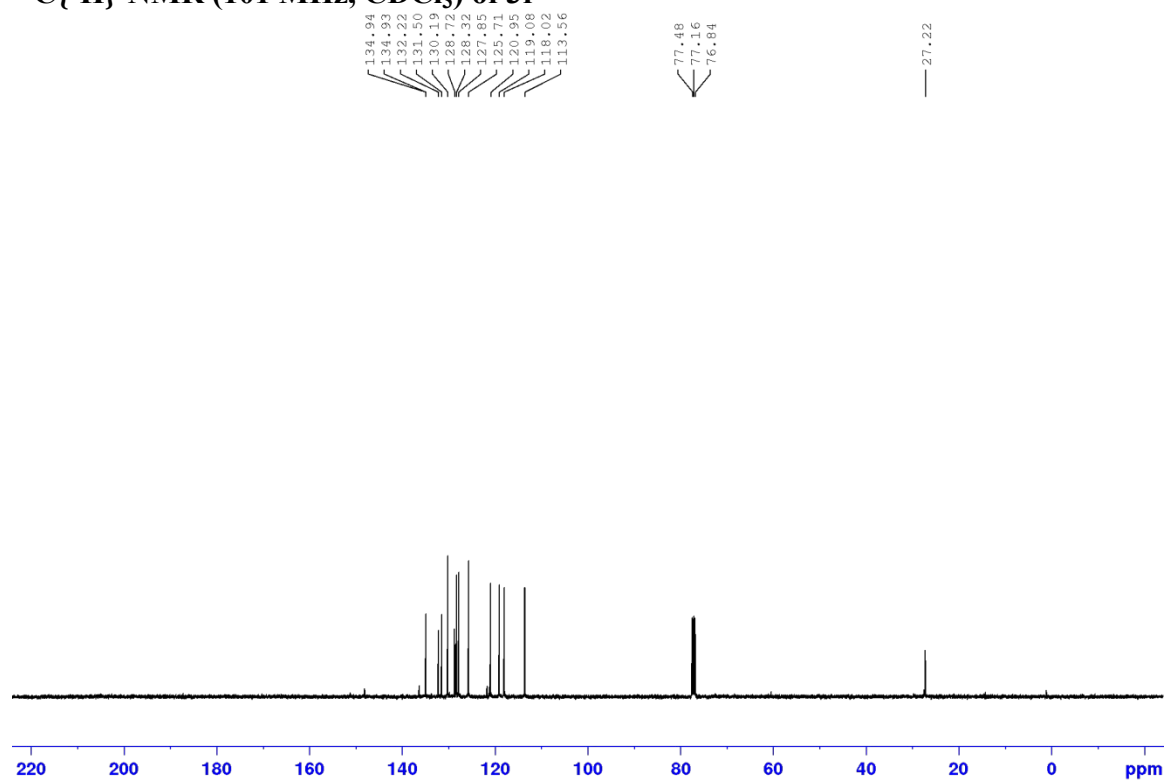

**DEPT-135 (101 MHz,  $\text{CDCl}_3$ ) of 3f**

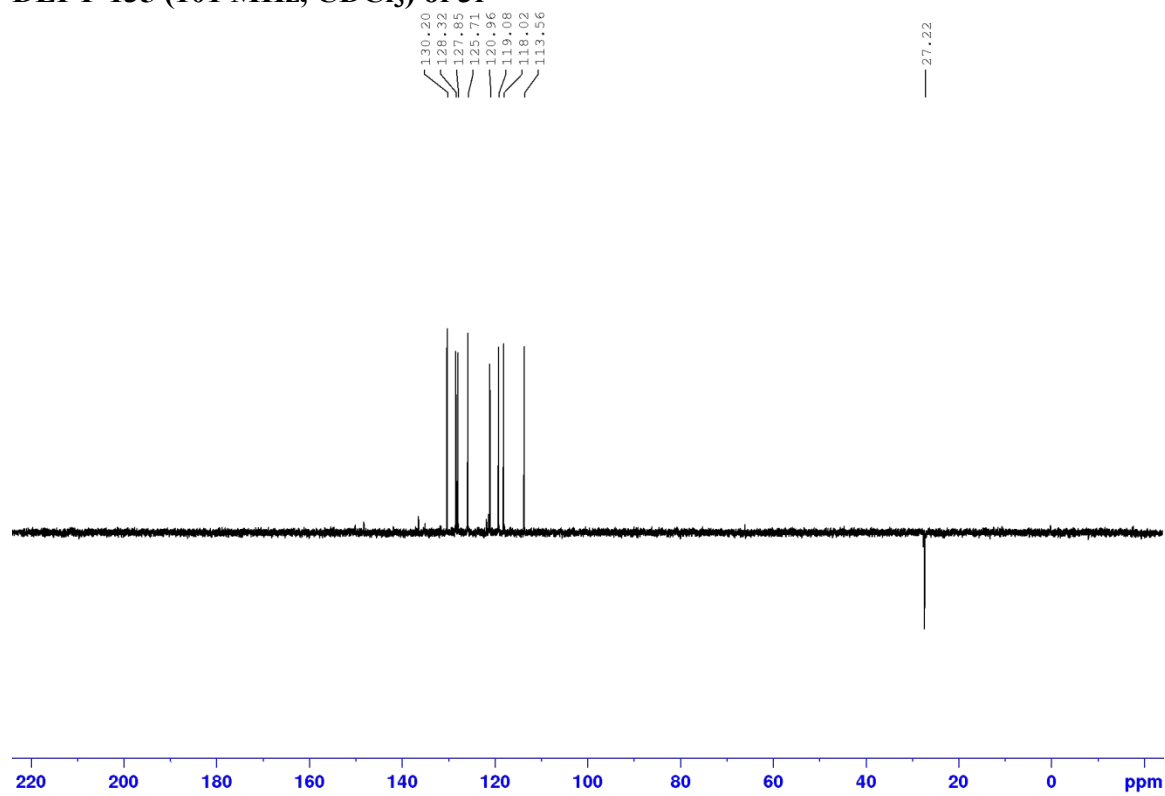

# HRMS of 3f

## Elemental Composition Report

Page 1

### Single Mass Analysis

Tolerance = 3.0 PPM / DBE: min = -1.5, max = 50.0

Element prediction: Off

Number of isotope peaks used for i-FIT = 3

Monoisotopic Mass, Even Electron Ions

22 formula(e) evaluated with 1 results within limits (up to 3 closest results for each mass)

Elements Used:

C: 0-27 H: 0-200 N: 0-4 Cl: 0-2

SM-316

QMI DIVISION, CSIR-IIIM JAMMU  
Xevo G2-XS QTOF YFC2015

12-Oct-2021

12:06:59

1: TOF MS ES+

2.62e+005

121021\_11 14 (0.293) Cm (14)

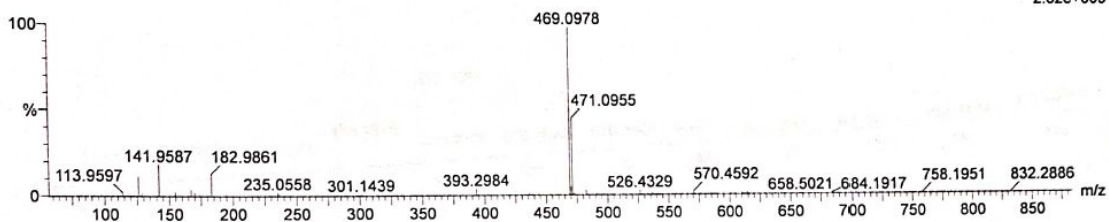

Minimum: -1.5  
Maximum: 2.0 3.0 50.0

| Mass     | Calc. Mass | mDa  | PPM  | DBE  | i-FIT | Norm | Conf (%) | Formula        |
|----------|------------|------|------|------|-------|------|----------|----------------|
| 469.0978 | 469.0987   | -0.9 | -1.9 | 19.5 | 32.0  | n/a  | n/a      | C27 H19 N4 Cl2 |

## <sup>1</sup>H-NMR (400 MHz, CDCl<sub>3</sub>) of 3g

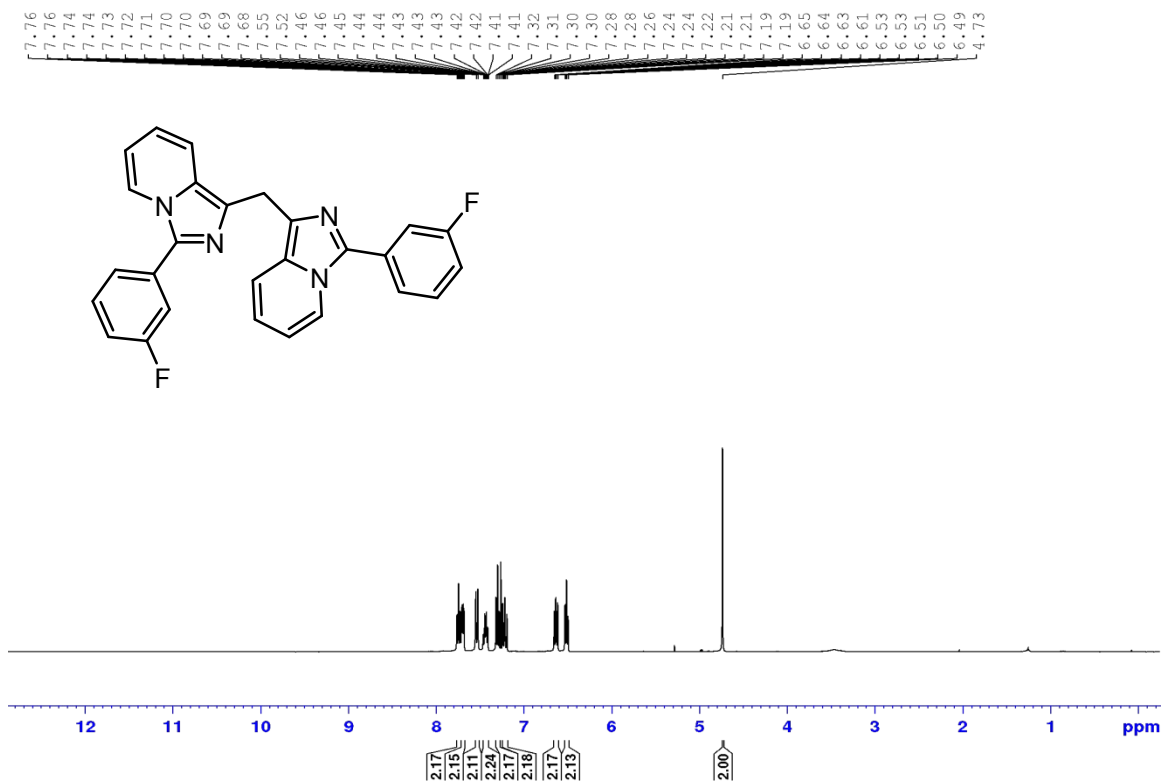

**$^{13}\text{C}\{^1\text{H}\}$ -NMR (101 MHz,  $\text{CDCl}_3$ ) of 3g**

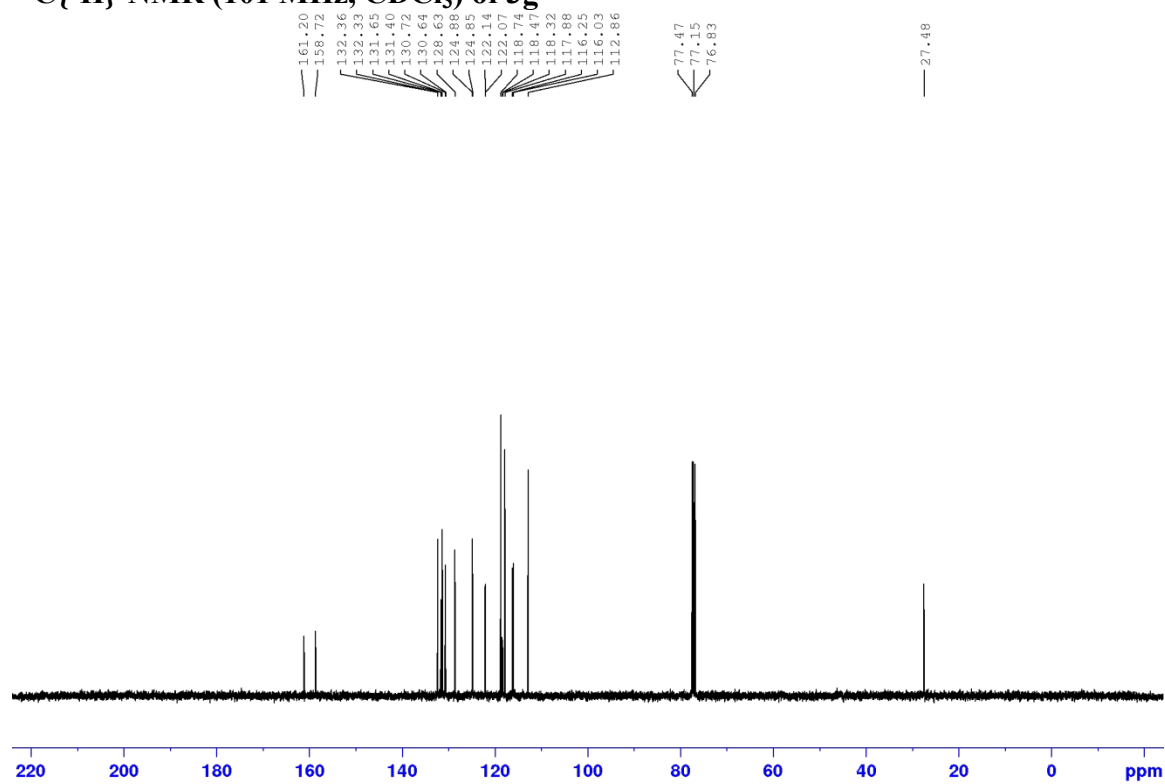

**DEPT-135 (101 MHz,  $\text{CDCl}_3$ ) of 3g**

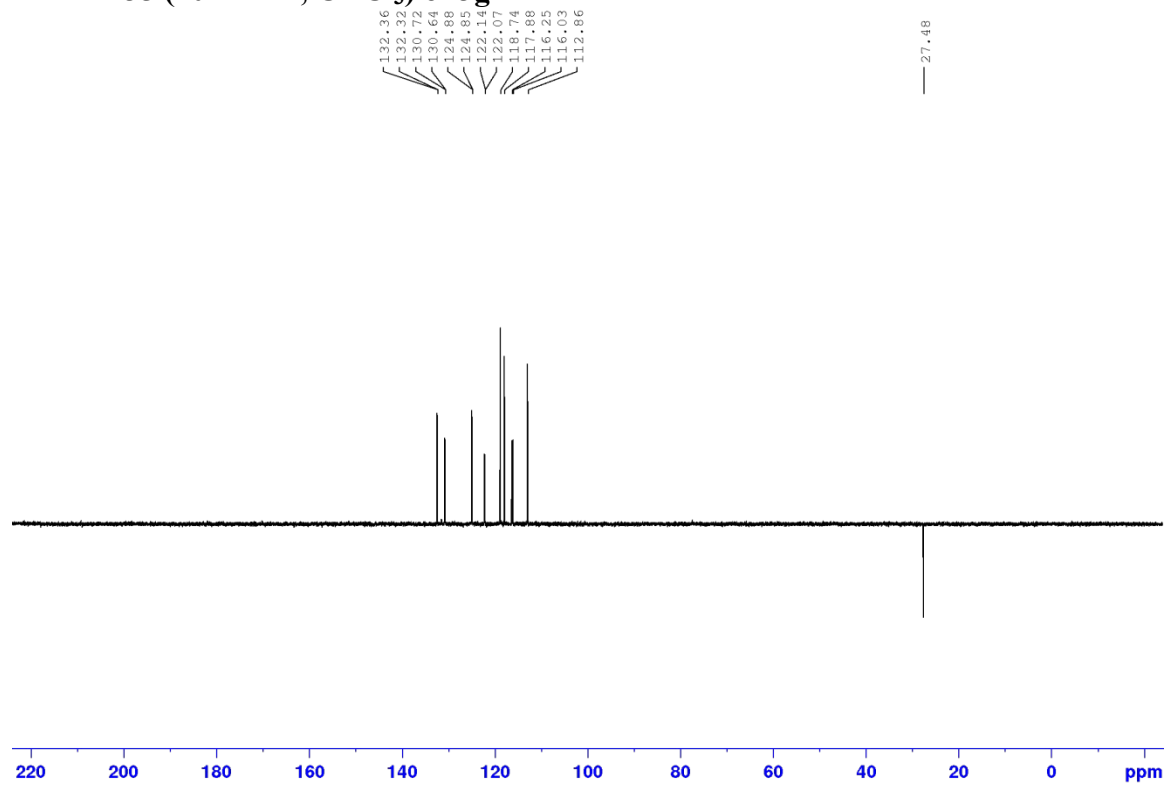

# <sup>19</sup>F-NMR (377 MHz, CDCl<sub>3</sub>) of 3g

-110.88  
-110.89  
-110.91  
-110.92  
-110.93  
-110.95

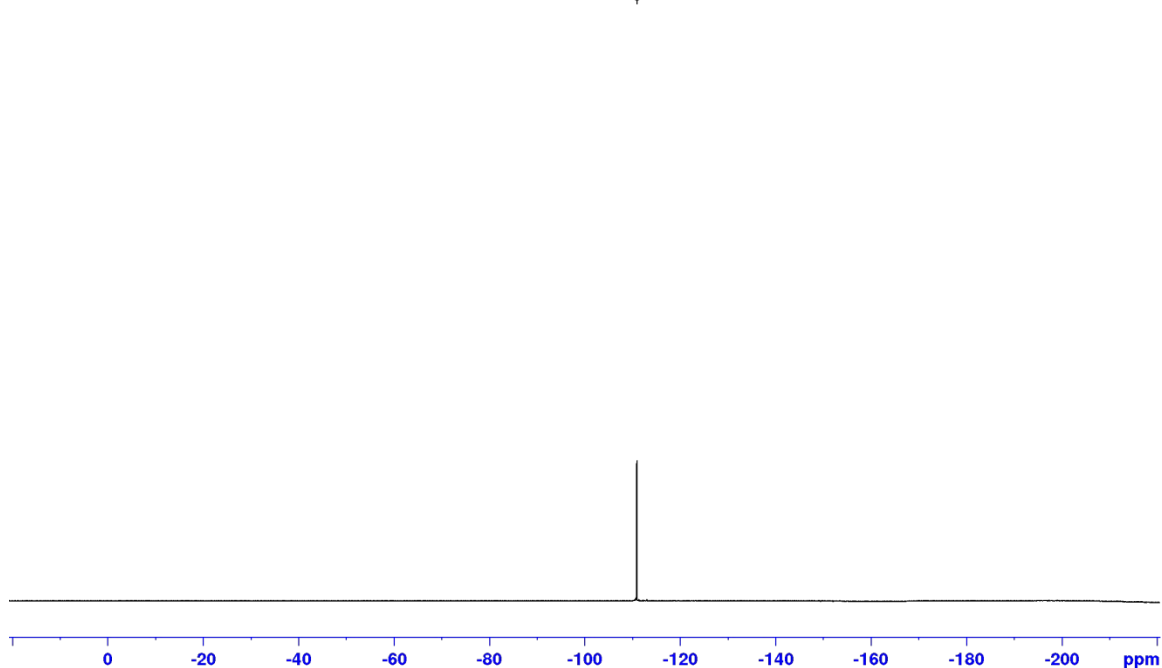

## HRMS of 3g

### Elemental Composition Report

Page 1

### Single Mass Analysis

Tolerance = 50.0 PPM / DBE: min = -1.5, max = 50.0

Element prediction: Off

Number of isotope peaks used for i-FIT = 3

Monoisotopic Mass, Even Electron Ions

24 formula(e) evaluated with 1 results within limits (up to 3 closest results for each mass)

Elements Used:

C: 0-27 H: 0-100 N: 0-4 F: 0-2

SM-380

QMI DIVISION, CSIR-IIIM JAMMU  
Xevo G2-XS QTOF YFC2015

12-Jul-2023

11:46:56

1: TOF MS ES+

9.46e+005

120723\_02 14 (0.293)

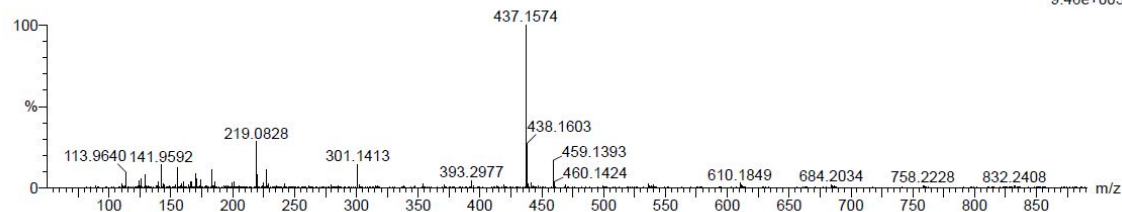

Minimum: -1.5  
Maximum: 50.0

| Mass     | Calc. Mass | mDa  | PPM  | DBE  | i-FIT | Norm | Conf (%) | Formula                                                       |
|----------|------------|------|------|------|-------|------|----------|---------------------------------------------------------------|
| 437.1574 | 437.1578   | -0.4 | -0.9 | 19.5 | 733.9 | n/a  | n/a      | C <sub>27</sub> H <sub>19</sub> N <sub>4</sub> F <sub>2</sub> |

**$^1\text{H-NMR}$  (400 MHz,  $\text{DMSO-d}_6$  and  $\text{Acetone-d}_6$ ) of 3h**

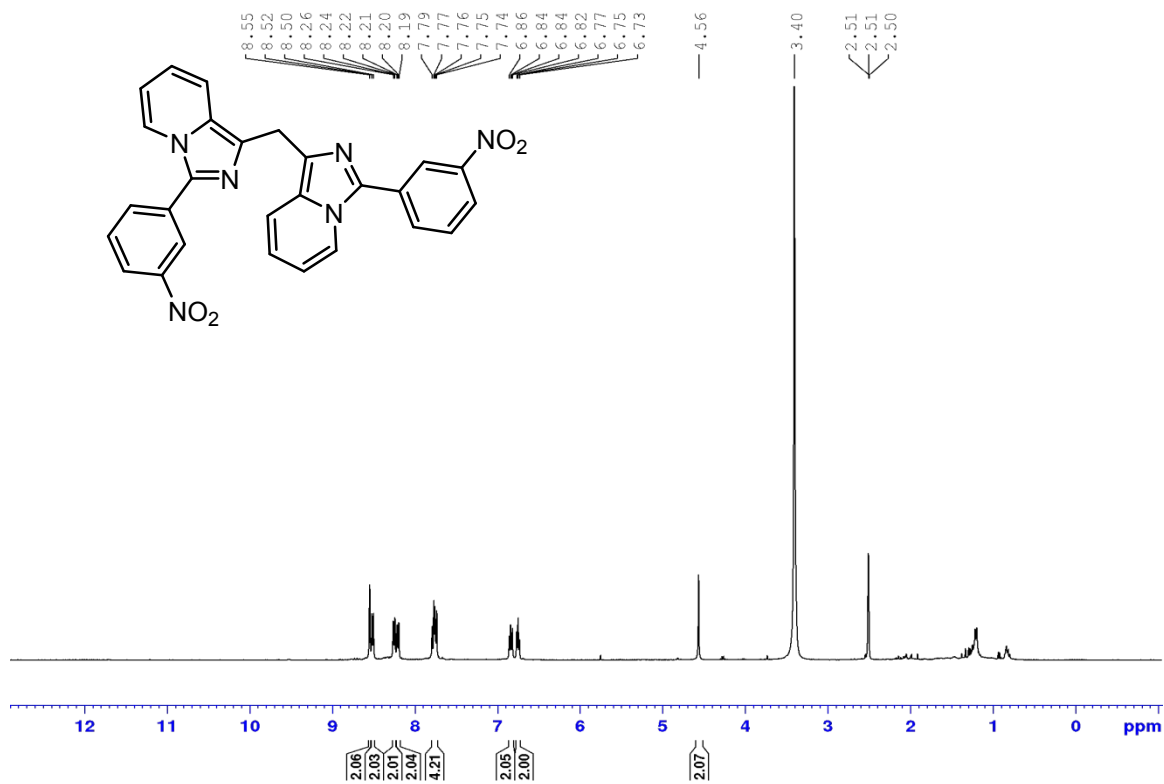

**$^{13}\text{C}\{^1\text{H}\}$ -NMR (101 MHz,  $\text{DMSO-d}_6$  and  $\text{Acetone-d}_6$ ) of 3h**

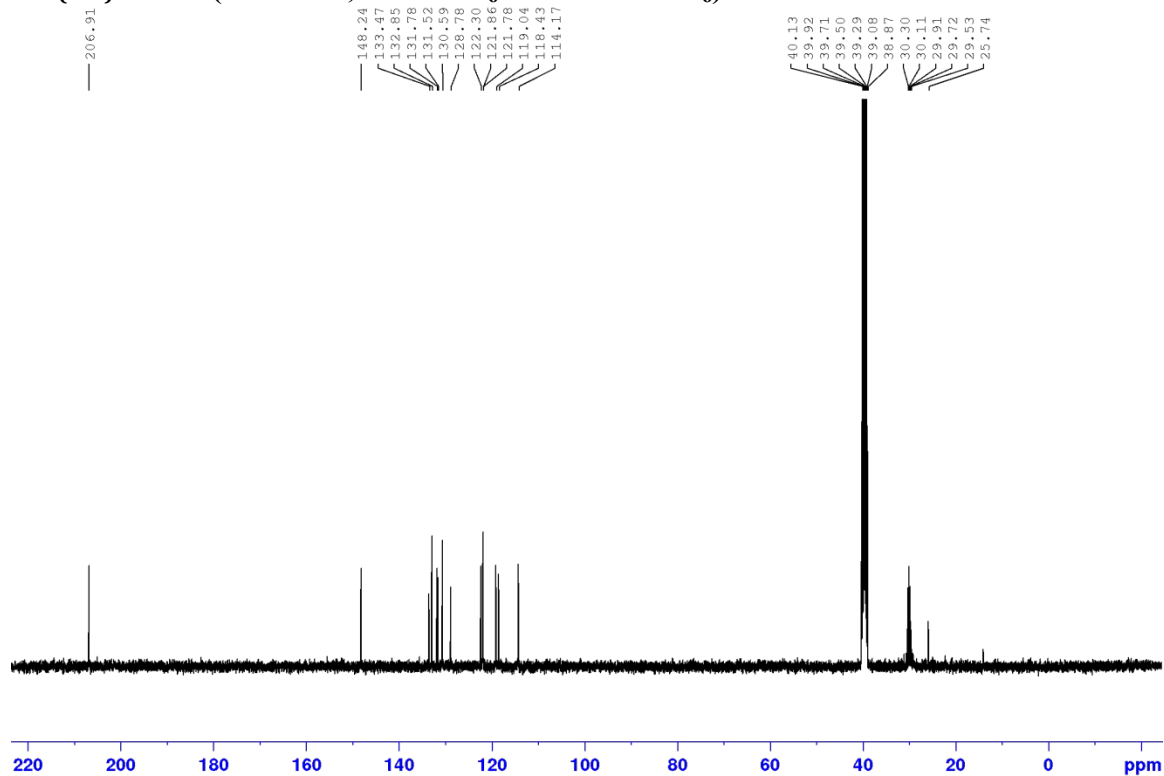

# DEPT-135 (101 MHz, DMSO-d<sub>6</sub> and Acetone-d<sub>6</sub>) of 3h

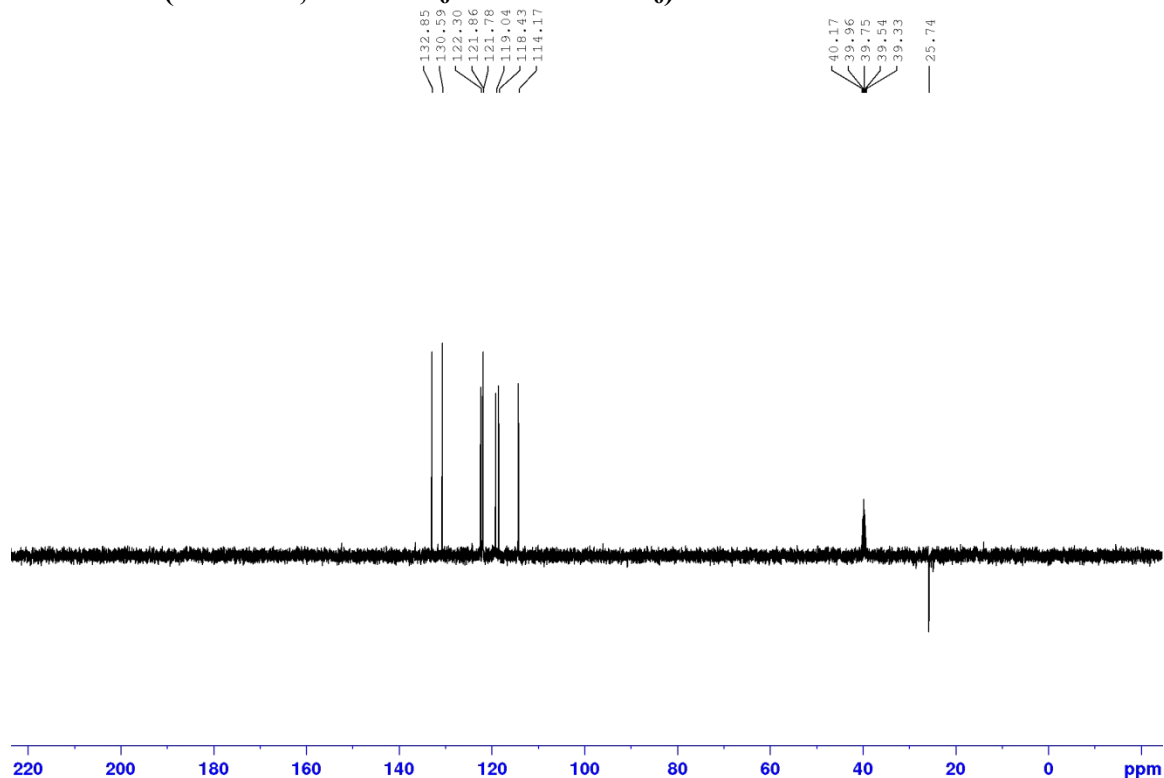

## HRMS of 3h

### Elemental Composition Report

Page 1

#### Single Mass Analysis

Tolerance = 50.0 PPM / DBE: min = -1.5, max = 50.0

Element prediction: Off

Number of isotope peaks used for i-FIT = 3

Monoisotopic Mass, Even Electron Ions

45 formula(e) evaluated with 1 results within limits (up to 3 closest results for each mass)

Elements Used:

C: 0-27 H: 0-100 N: 0-6 O: 0-4

SM-373

QMI DIVISION, CSIR-IIIM JAMMU  
Xevo G2-XS QTOF YFC2015

05-Dec-2022

13:09:15

1: TOF MS ES+

5.91e+006

051222\_22 9 (0.208)

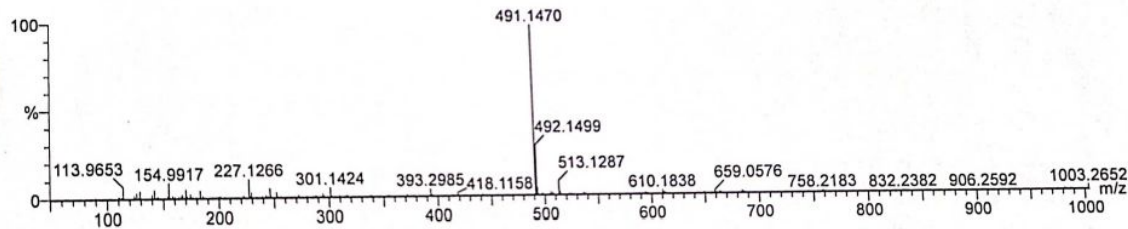

Minimum: -1.5  
Maximum: 2.0 50.0 50.0

| Mass     | Calc. Mass | mDa | PPM | DBE  | i-FIT | Norm | Conf (%) | Formula       |
|----------|------------|-----|-----|------|-------|------|----------|---------------|
| 491.1470 | 491.1468   | 0.2 | 0.4 | 21.5 | 842.3 | n/a  | n/a      | C27 H19 N6 O4 |



**<sup>1</sup>H-NMR (400 MHz, CDCl<sub>3</sub>) of 3i**

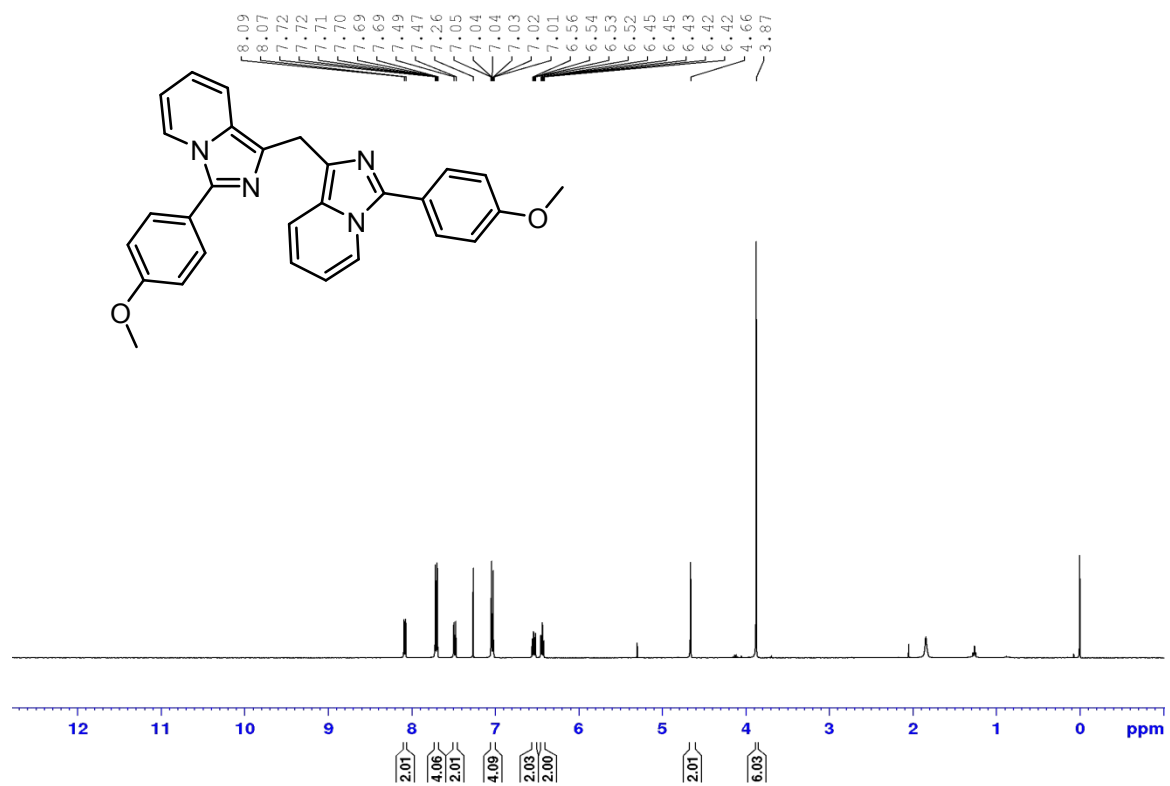

**<sup>13</sup>C{<sup>1</sup>H}-NMR (101 MHz, CDCl<sub>3</sub>) of 3i**

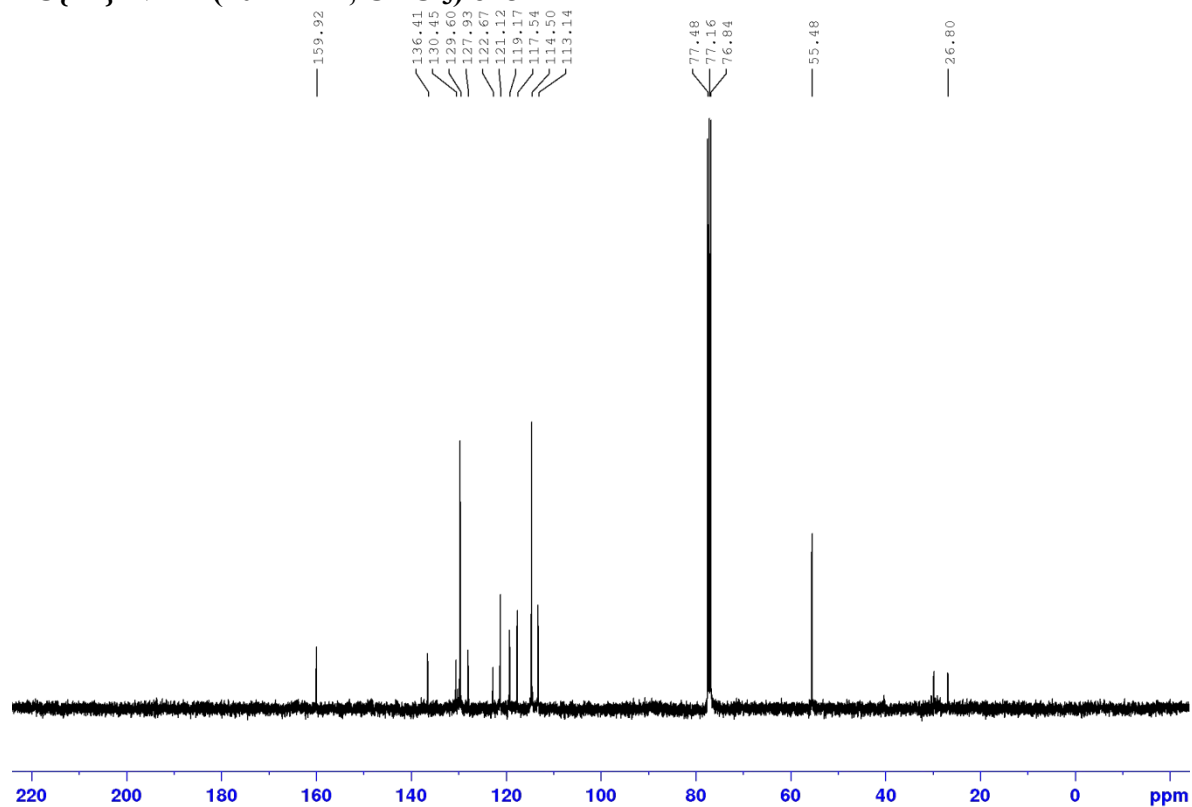

# DEPT-135 (101 MHz, CDCl<sub>3</sub>) of 3i

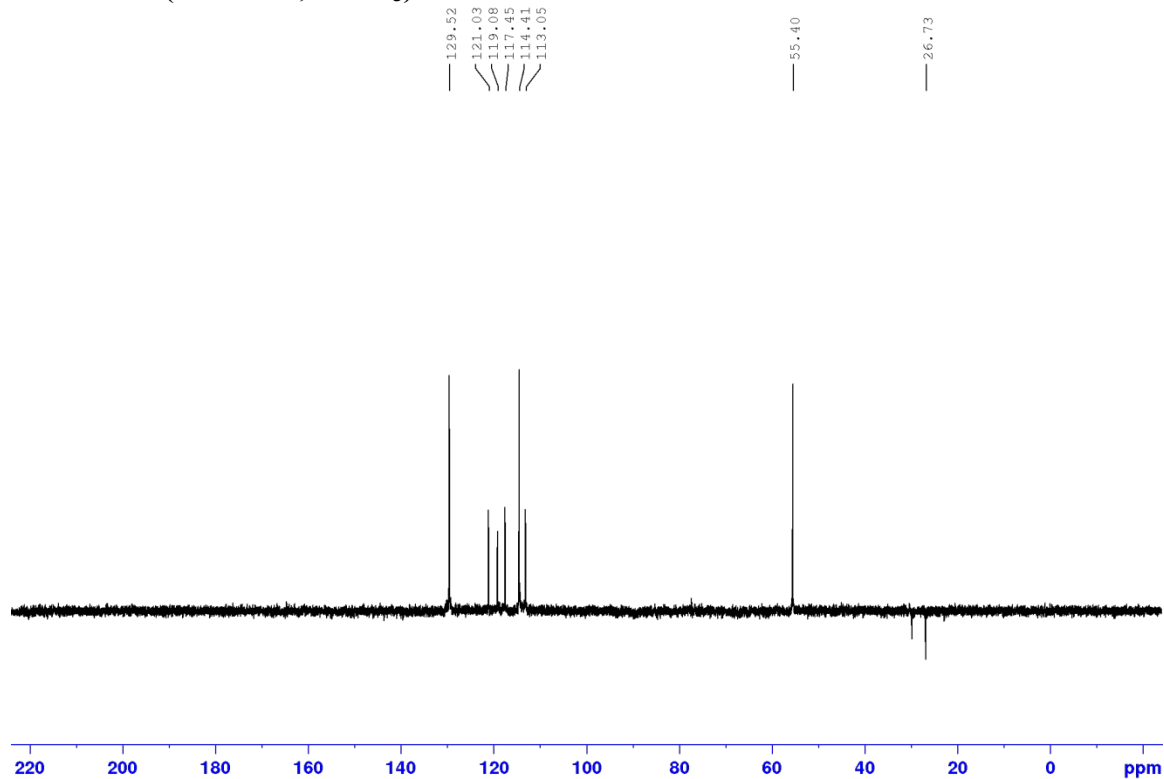

## HRMS of 3i

### Elemental Composition Report

Page 1

#### Single Mass Analysis

Tolerance = 100.0 PPM / DBE: min = -1.5, max = 50.0

Element prediction: Off

Number of isotope peaks used for i-FIT = 3

Monoisotopic Mass, Even Electron Ions

25 formula(e) evaluated with 1 results within limits (up to 3 closest results for each mass)

Elements Used:

C: 0-29 H: 0-100 N: 0-4 O: 0-2

SM-243

160323\_13 6 (0.138)

QMI DIVISION, CSIR-IIIM JAMMU  
Xevo G2-XS QTOF YFC2015

16-Mar-2023  
12:52:26  
1: TOF MS ES+  
1.47e+007

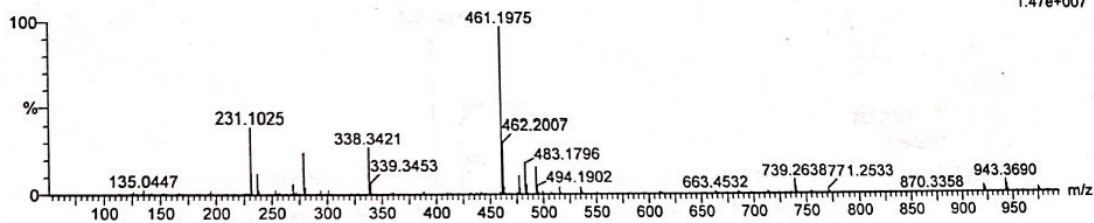

Minimum: -1.5  
Maximum: 2.0 100.0 50.0

| Mass     | Calc. Mass | mDa  | PPM  | DBE  | i-FIT | Norm | Conf (%) | Formula                                                       |
|----------|------------|------|------|------|-------|------|----------|---------------------------------------------------------------|
| 461.1975 | 461.1978   | -0.3 | -0.7 | 19.5 | 878.6 | n/a  | n/a      | C <sub>29</sub> H <sub>25</sub> N <sub>4</sub> O <sub>2</sub> |

**<sup>1</sup>H-NMR (400 MHz, CDCl<sub>3</sub>) of 3j**

8.18  
8.16  
7.58  
7.58  
7.51  
7.56  
7.49  
7.48  
7.47  
7.46  
7.45  
7.43  
7.26  
7.11  
7.11  
7.09  
7.09  
7.08  
7.07  
7.07  
7.06  
6.65  
6.63  
6.62  
6.61  
6.54  
6.53  
6.52  
6.50  
4.65

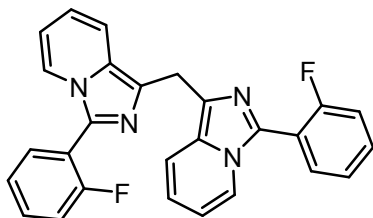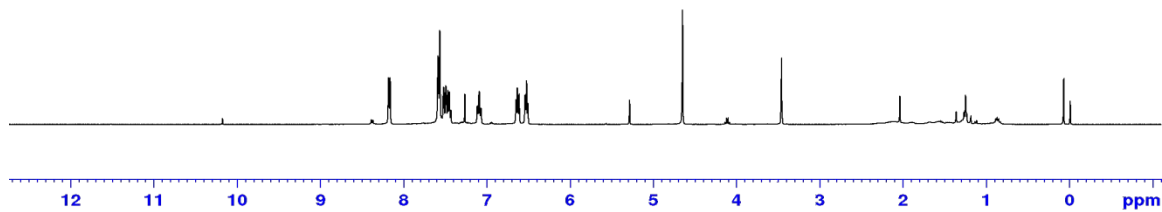

**<sup>13</sup>C{<sup>1</sup>H}-NMR (101 MHz, CDCl<sub>3</sub>) of 3j**

164.39  
161.94  
135.22  
135.19  
132.64  
132.55  
131.52  
131.70  
130.61  
128.78  
123.43  
123.40  
121.08  
119.25  
118.06  
115.46  
115.25  
115.05  
114.82  
113.63

77.47  
77.15  
76.84

27.25

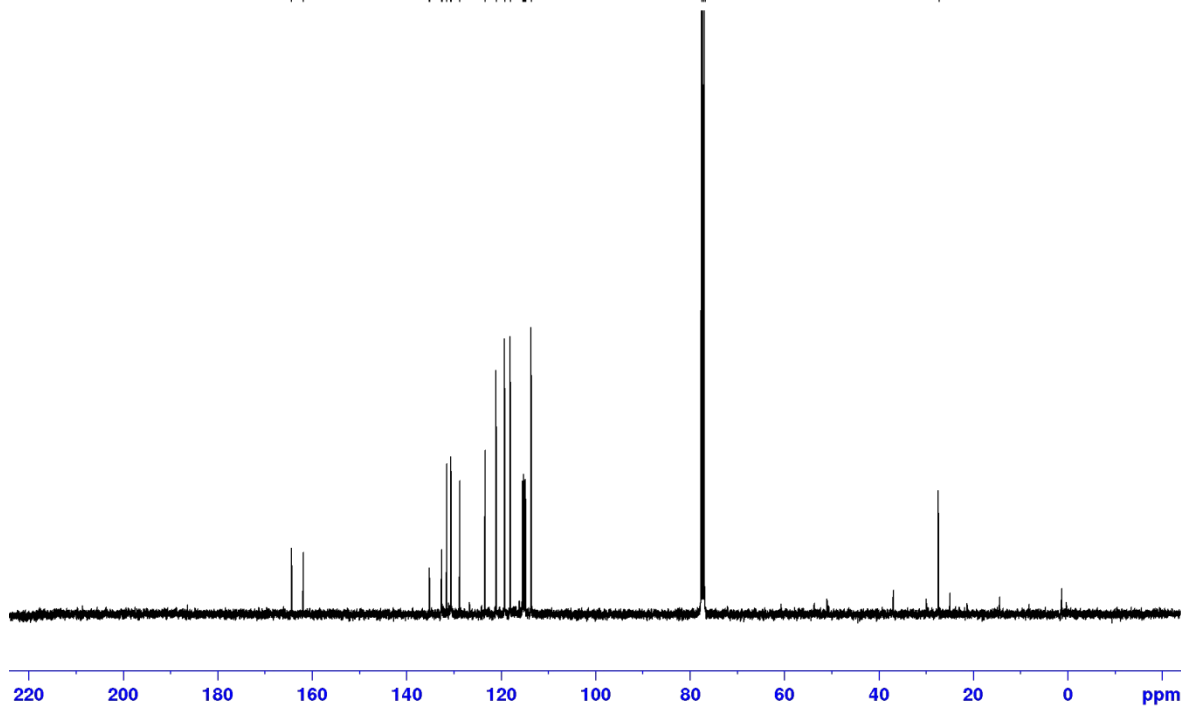

DEPT-135 (101 MHz, CDCl<sub>3</sub>) of 3j

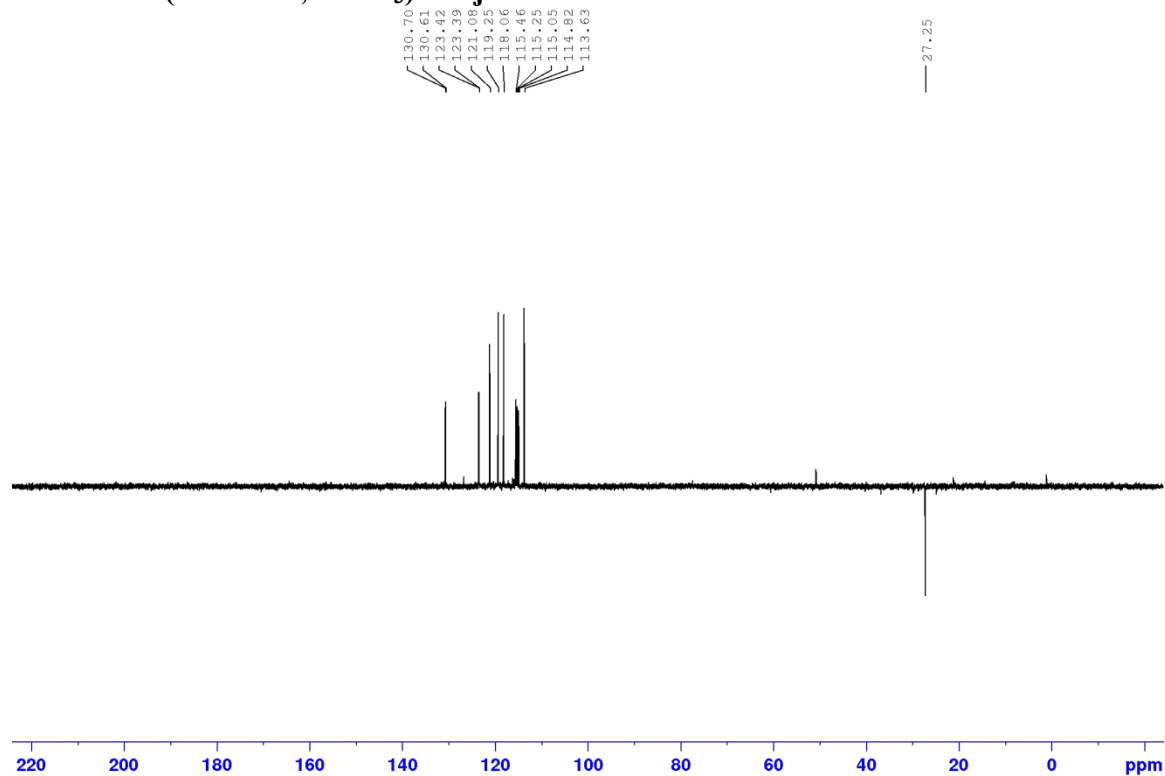

<sup>19</sup>F-NMR (377 MHz, CDCl<sub>3</sub>) of 3j

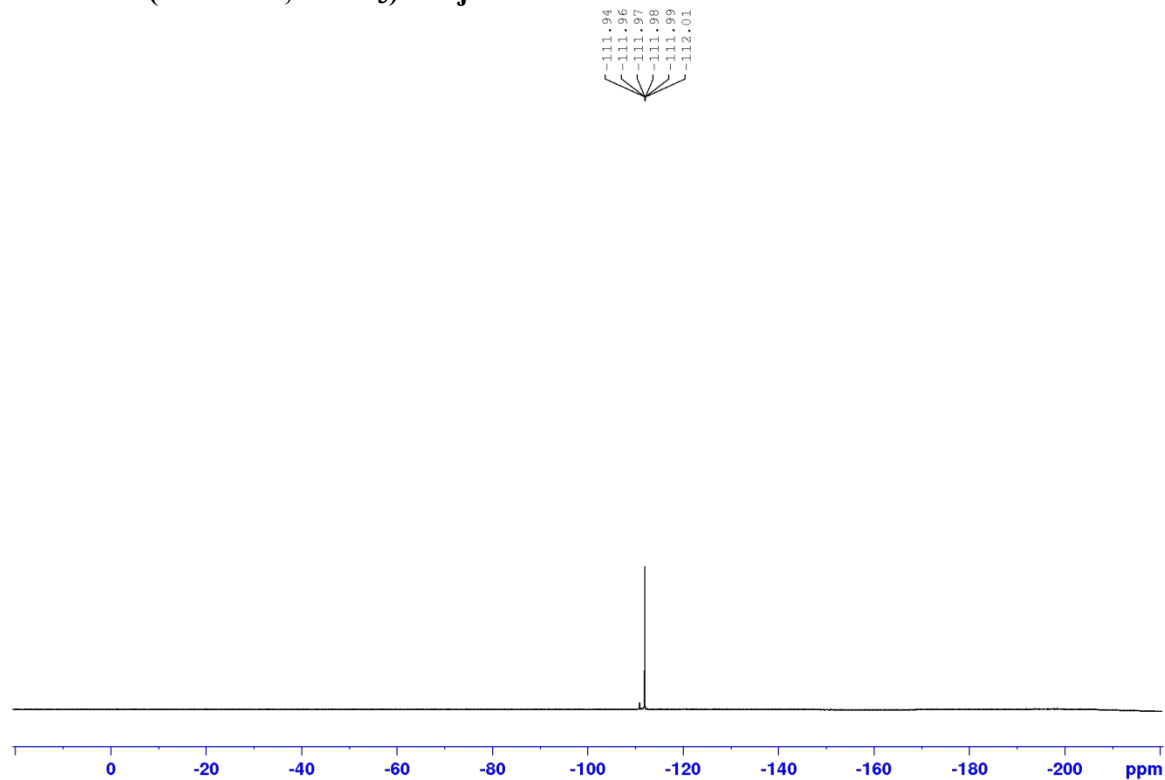

# HRMS of 3j

## Elemental Composition Report

Page 1

### Single Mass Analysis

Tolerance = 50.0 PPM / DBE: min = -1.5, max = 50.0

Element prediction: Off

Number of isotope peaks used for i-FIT = 3

Monoisotopic Mass, Even Electron Ions

24 formula(e) evaluated with 1 results within limits (up to 3 closest results for each mass)

Elements Used:

C: 0-27 H: 0-100 N: 0-4 F: 0-2

SM-377

QMI DIVISION, CSIR-IIIM JAMMU  
Xevo G2-XS QTOF YFC2015

12-Jul-2023  
11:49:31  
1: TOF MS ES+  
7.05e+006

120723\_03 5 (0.121)

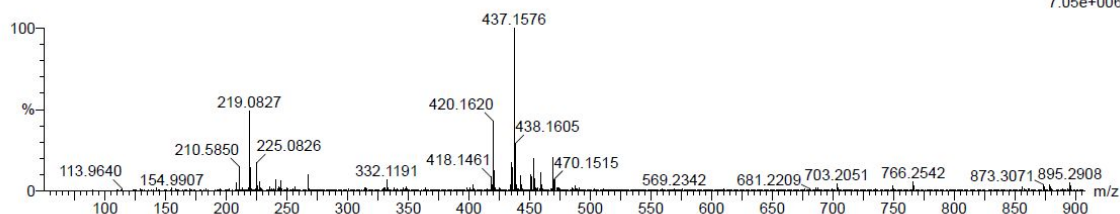

Minimum: -1.5  
Maximum: 50.0

| Mass     | Calc. Mass | mDa  | PPM  | DBE  | i-FIT | Norm | Conf (%) | Formula       |
|----------|------------|------|------|------|-------|------|----------|---------------|
| 437.1576 | 437.1578   | -0.2 | -0.5 | 19.5 | 854.9 | n/a  | n/a      | C27 H19 N4 F2 |

## <sup>1</sup>H-NMR (400 MHz, CDCl<sub>3</sub>) of 3k

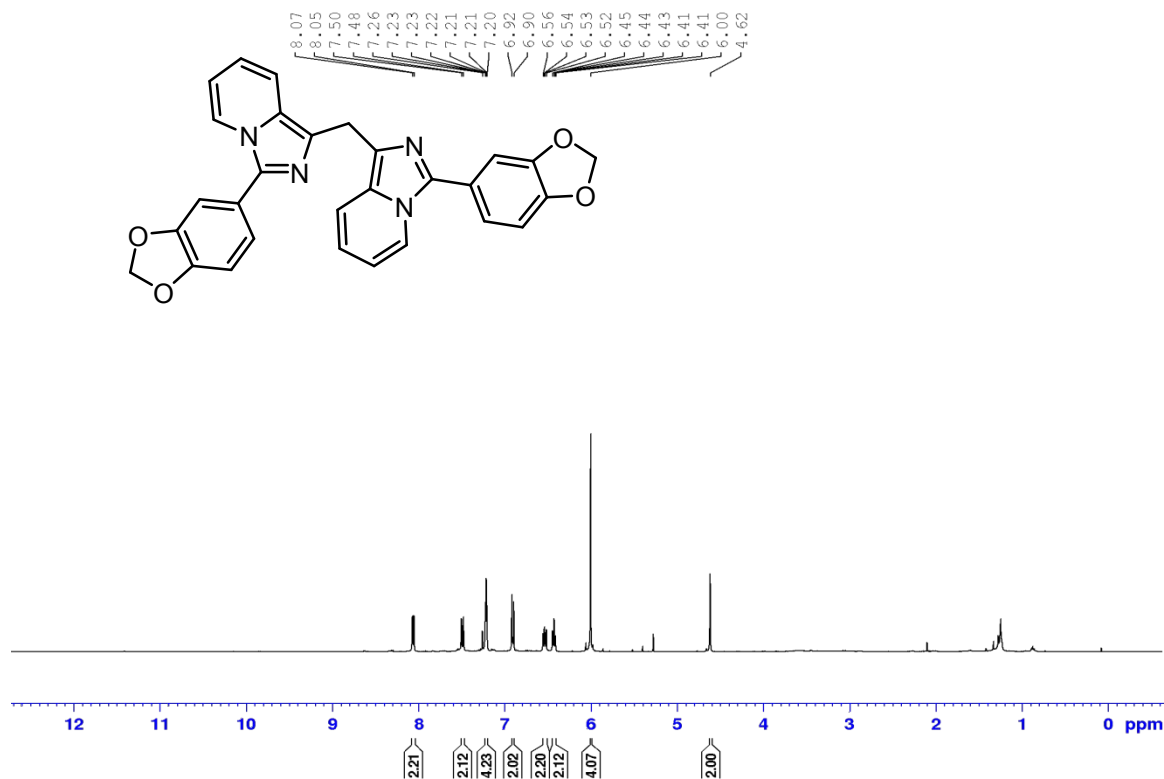

**$^{13}\text{C}\{^1\text{H}\}$ -NMR (101 MHz,  $\text{CDCl}_3$ ) of 3k**

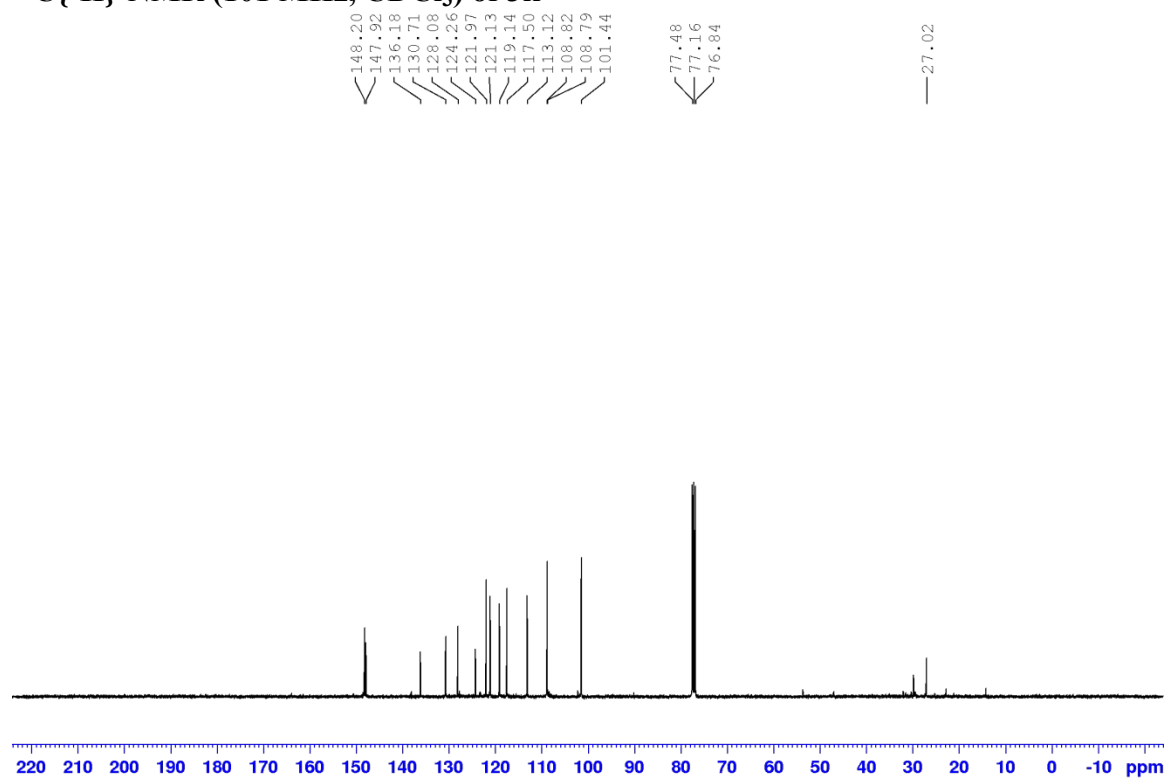

**DEPT-135 (101 MHz,  $\text{CDCl}_3$ ) of 3k**

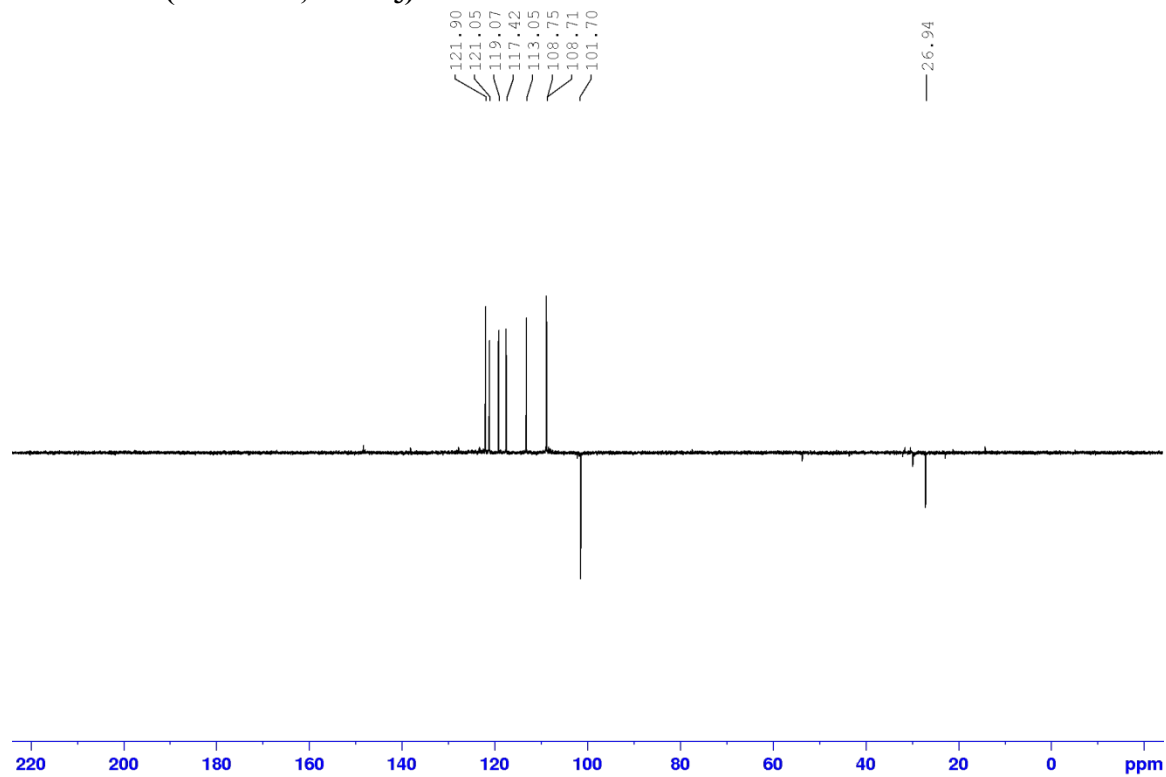

# HRMS of 3k

## Elemental Composition Report

Page 1

### Single Mass Analysis

Tolerance = 100.0 PPM / DBE: min = -1.5, max = 50.0

Element prediction: Off

Number of isotope peaks used for i-FIT = 3

Monoisotopic Mass, Even Electron Ions

35 formula(e) evaluated with 1 results within limits (up to 3 closest results for each mass)

Elements Used:

C: 0-29 H: 0-100 N: 0-4 O: 0-4

SM-IMBIS

QMI DIVISION, CSIR-IIIM JAMMU  
Xevo G2-XS QTOF YFC2015

06-Oct-2023

14:48:06

1: TOF MS ES+

5.80e+006

061023\_31 5 (0.121)

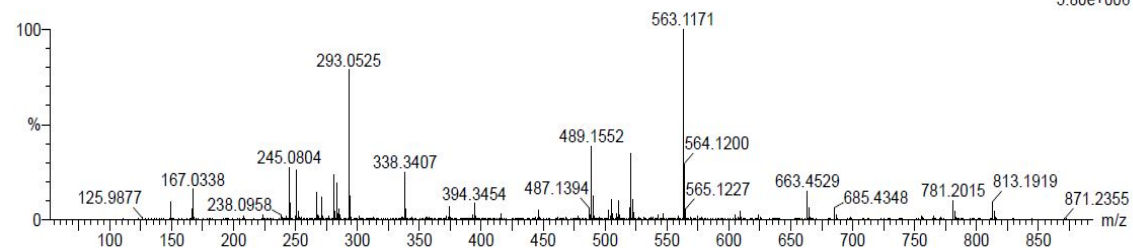

Minimum: -1.5  
Maximum: 2.0 100.0 50.0

| Mass     | Calc. Mass | mDa  | PPM  | DBE  | i-FIT | Norm | Conf(%) | Formula       |
|----------|------------|------|------|------|-------|------|---------|---------------|
| 489.1552 | 489.1563   | -1.1 | -2.2 | 21.5 | 803.8 | n/a  | n/a     | C29 H21 N4 O4 |

## <sup>1</sup>H-NMR (400 MHz, CDCl<sub>3</sub>) of 3l

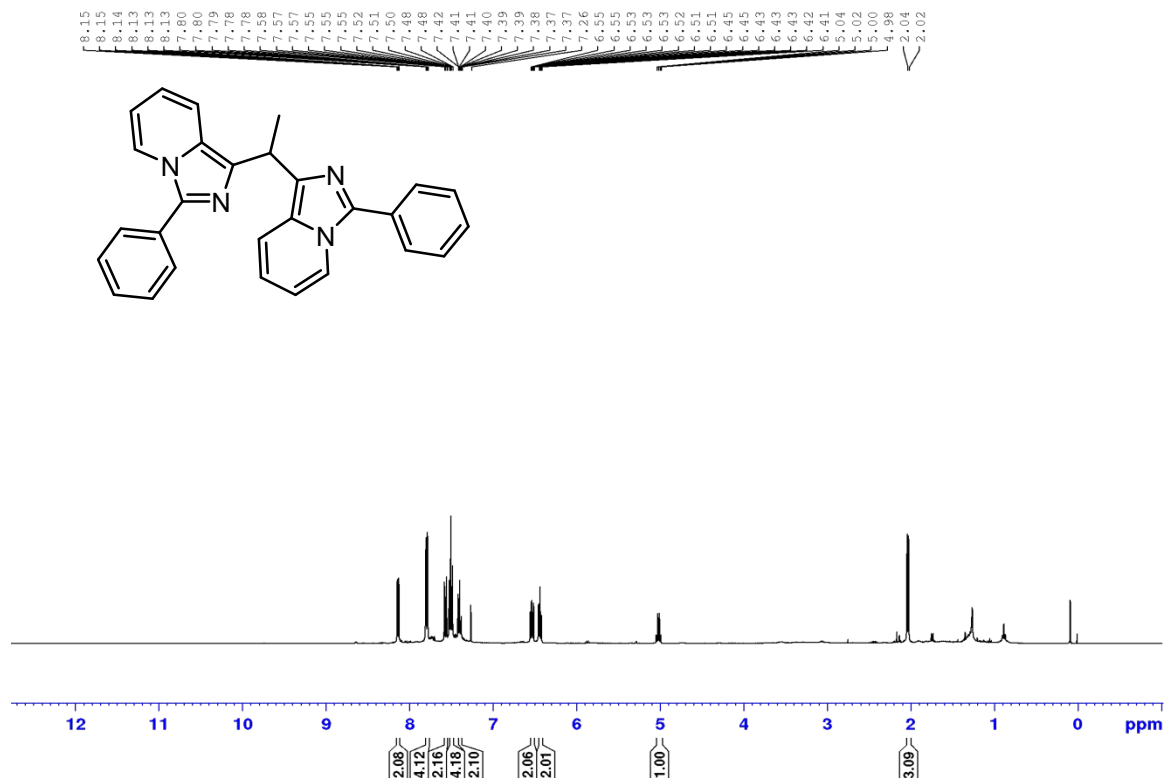

**$^{13}\text{C}\{^1\text{H}\}$ -NMR (101 MHz,  $\text{CDCl}_3$ ) of 31**

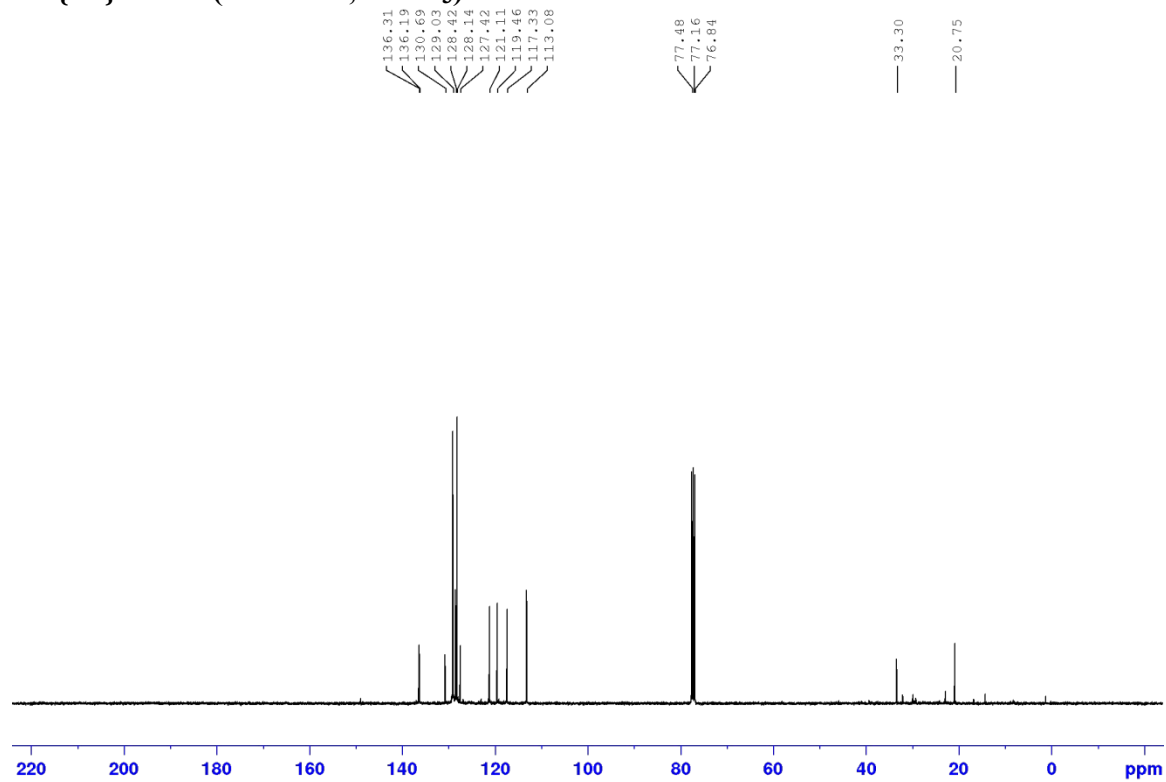

**DEPT-135 (101 MHz,  $\text{CDCl}_3$ ) of 31**

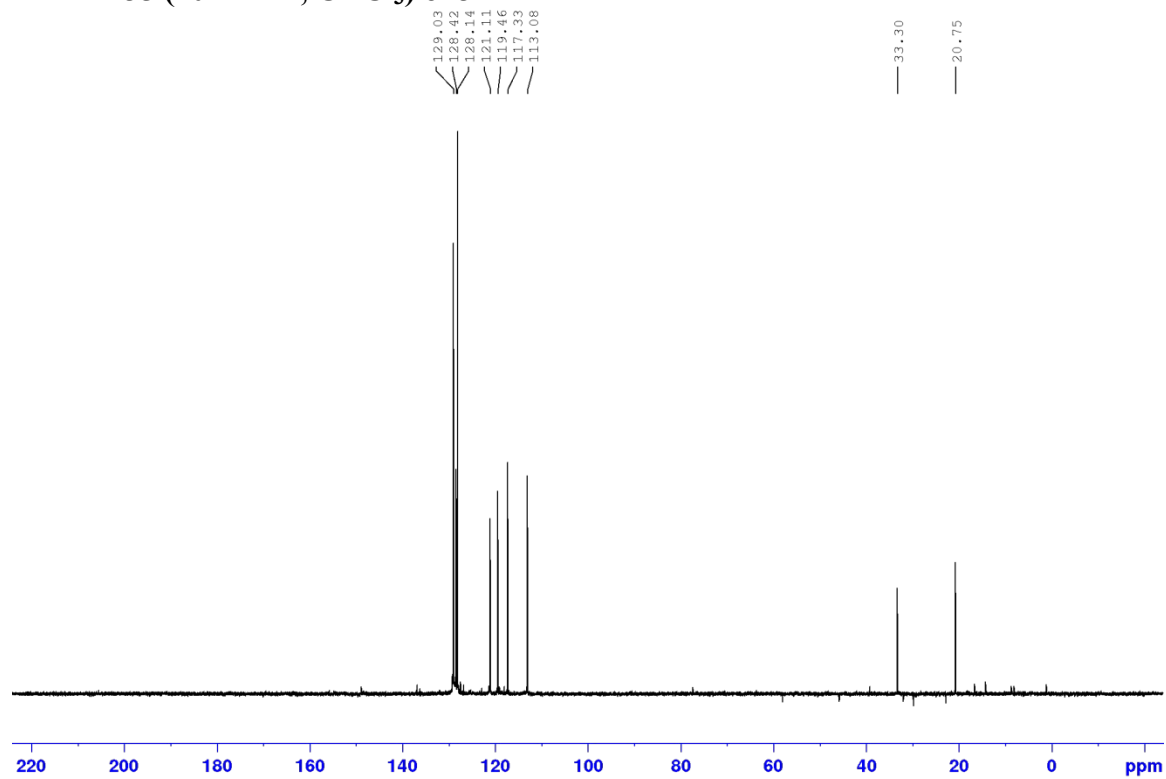



# HRMS of 3l

## Elemental Composition Report

Page 1

### Single Mass Analysis

Tolerance = 50.0 PPM / DBE: min = -1.5, max = 50.0

Element prediction: Off

Number of isotope peaks used for i-FIT = 3

Monoisotopic Mass, Even Electron Ions

11 formula(e) evaluated with 1 results within limits (up to 3 closest results for each mass)

Elements Used:

C: 0-28 H: 0-100 N: 0-4

SM-325

QMI DIVISION, CSIR-IIIM JAMMU  
Xevo G2-XS QTOF YFC2015

13-Sep-2022

12:26:27

1: TOF MS ES+

1.78e+007

130922\_06 8 (0.172)

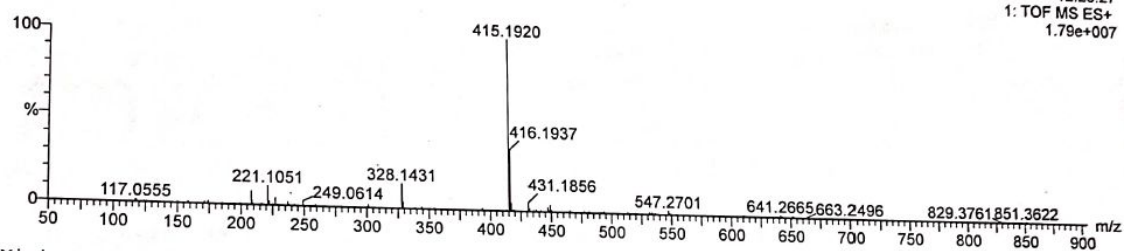

Minimum: -1.5  
Maximum: 50.0

| Mass     | Calc. Mass | mDa  | PPM  | DBE  | i-FIT | Norm | Conf (%) | Formula                                        |
|----------|------------|------|------|------|-------|------|----------|------------------------------------------------|
| 415.1920 | 415.1923   | -0.3 | -0.7 | 19.5 | 862.2 | n/a  | n/a      | C <sub>28</sub> H <sub>23</sub> N <sub>4</sub> |

## <sup>1</sup>H-NMR (400 MHz, CDCl<sub>3</sub>) of 3m

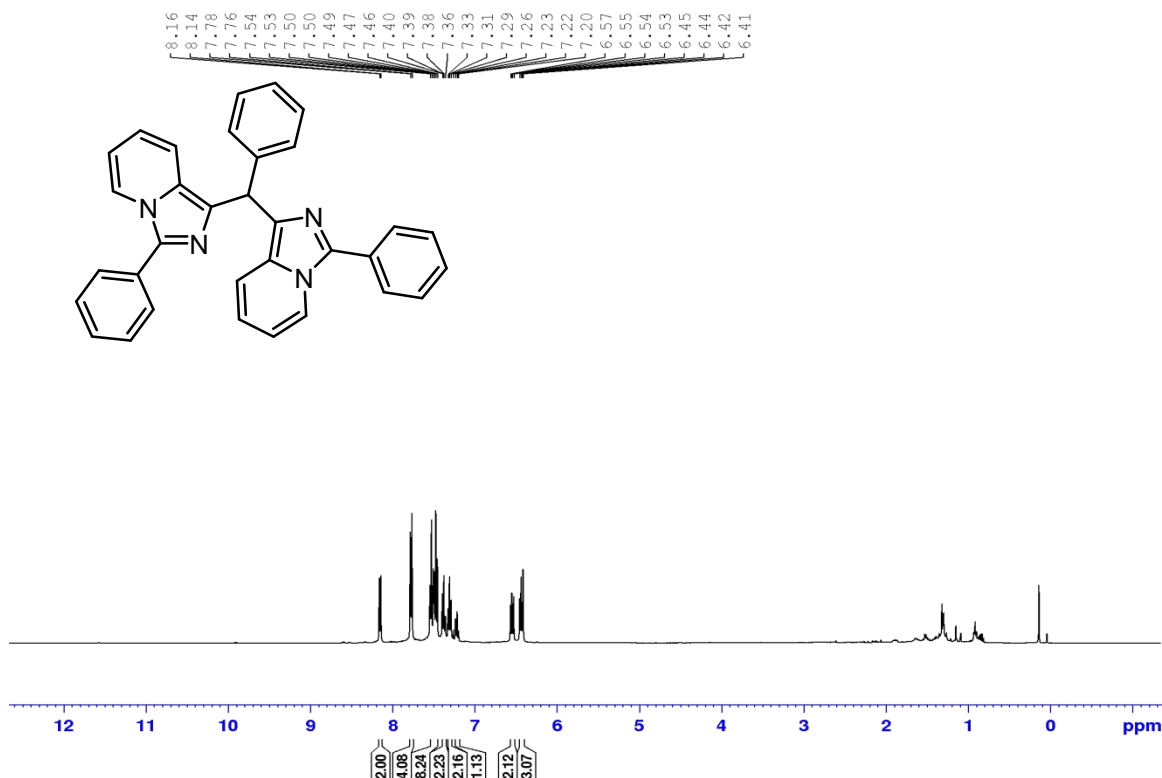

**$^{13}\text{C}\{^1\text{H}\}$ -NMR (101 MHz,  $\text{CDCl}_3$ ) of 3m**

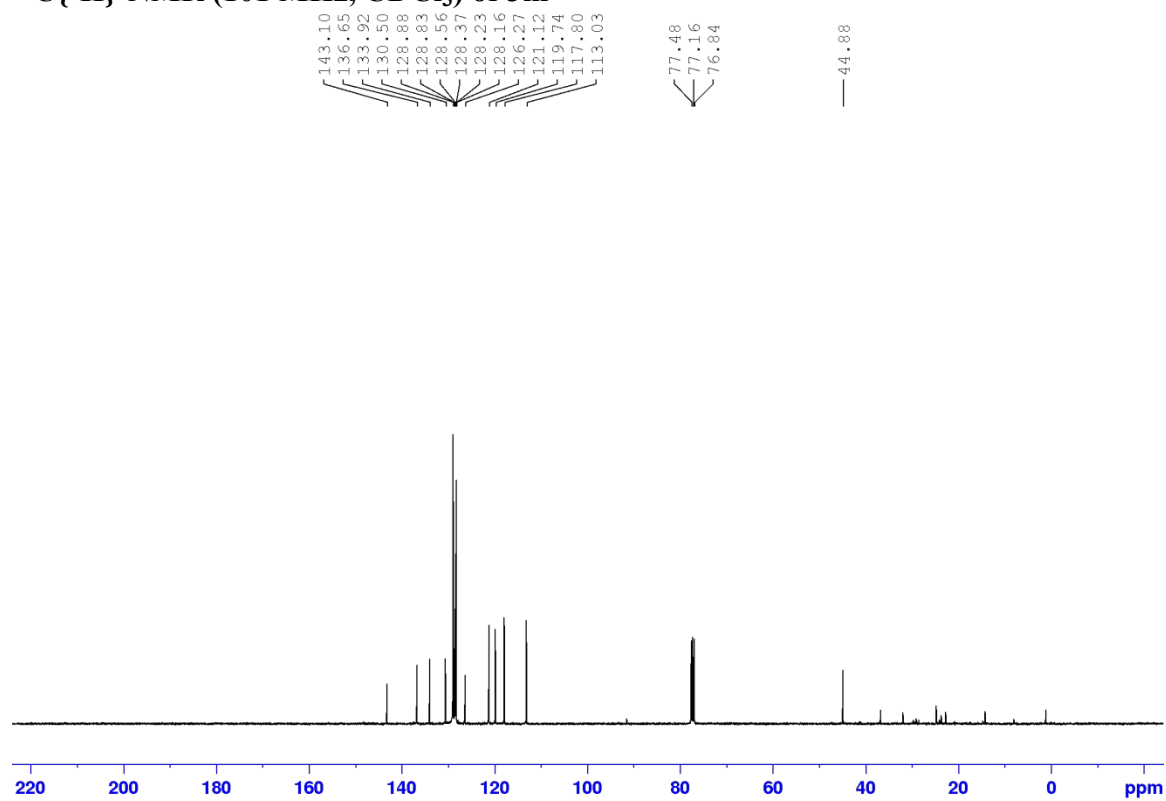

**DEPT-135 (101 MHz,  $\text{CDCl}_3$ ) of 3m**

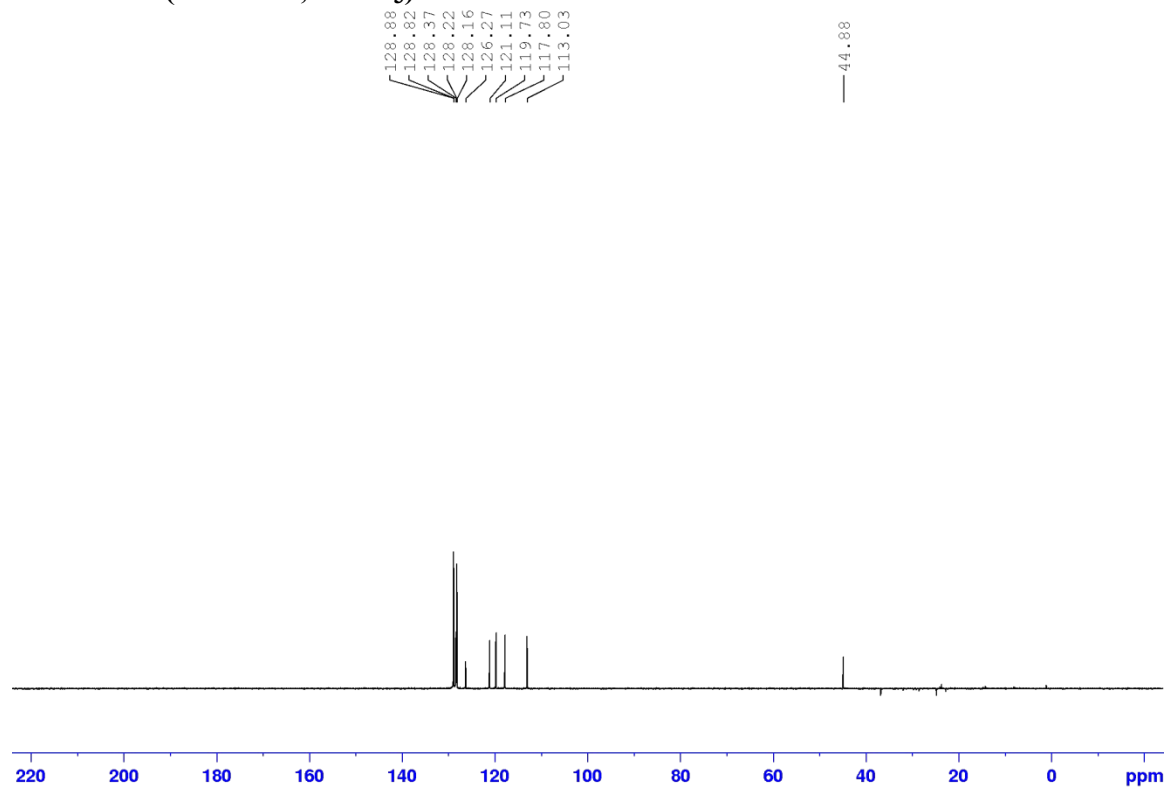

# HRMS of 3m

## Elemental Composition Report

Page 1

### Single Mass Analysis

Tolerance = 3.0 PPM / DBE: min = -1.5, max = 50.0

Element prediction: Off

Number of isotope peaks used for i-FIT = 3

Monoisotopic Mass, Even Electron Ions

28 formula(e) evaluated with 1 results within limits (up to 3 closest results for each mass)

Elements Used:

C: 0-33 H: 0-200 B: 0-1 N: 0-4

SM-INT (last)

QMI DIVISION, CSIR-IIIM JAMMU  
Xevo G2-XS QTOF YFC2015

14-Sep-2021

11:31:51

1: TOF MS ES+

1.19e+006

140921\_06 15 (0.310) Cm (15:16)

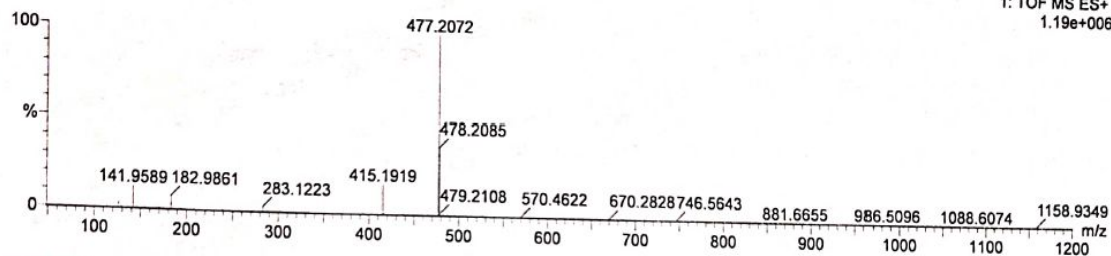

Minimum: -1.5  
Maximum: 2.0 3.0 50.0

| Mass     | Calc. Mass | mDa  | PPM  | DBE  | i-FIT | Norm | Conf (%) | Formula    |
|----------|------------|------|------|------|-------|------|----------|------------|
| 477.2072 | 477.2079   | -0.7 | -1.5 | 23.5 | 38.3  | n/a  | n/a      | C33 H25 N4 |

## <sup>1</sup>H-NMR (400 MHz, CDCl<sub>3</sub>) of 3n

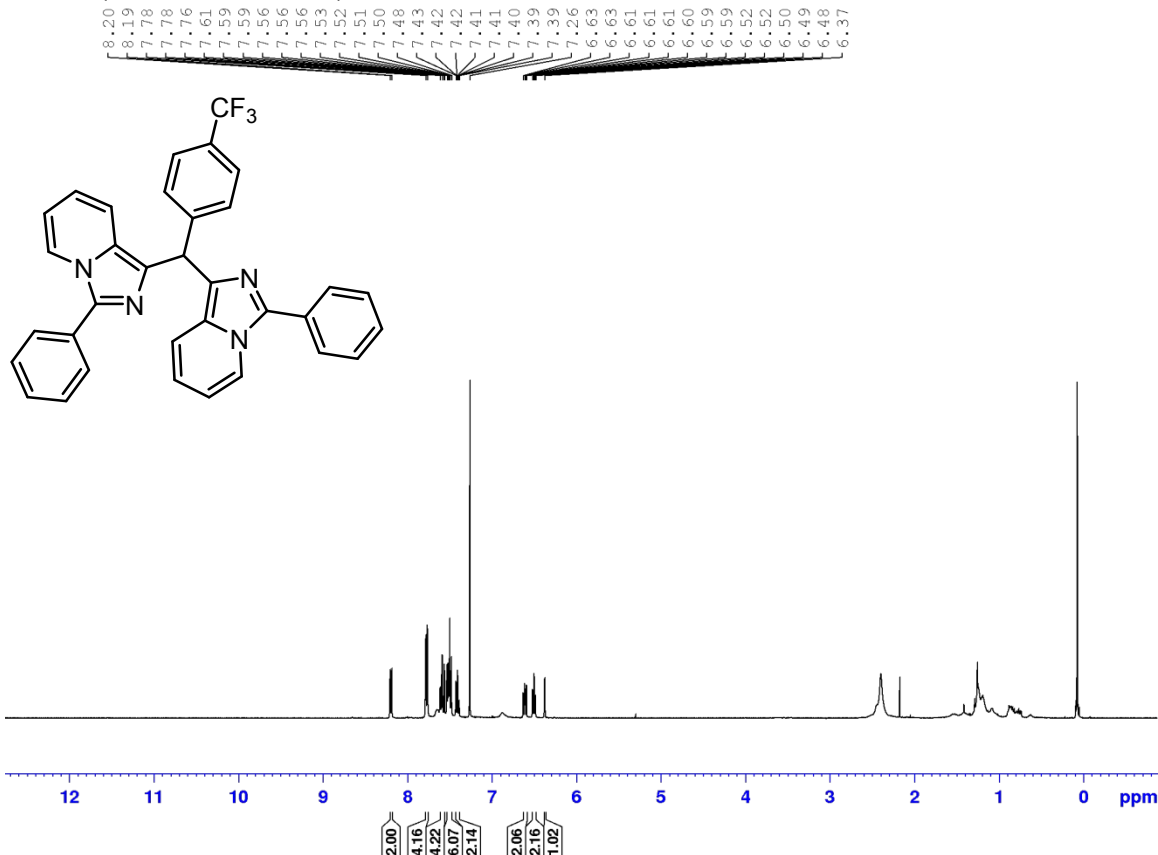

**$^{13}\text{C}\{^1\text{H}\}$ -NMR (101 MHz,  $\text{CDCl}_3$ ) of 3n**

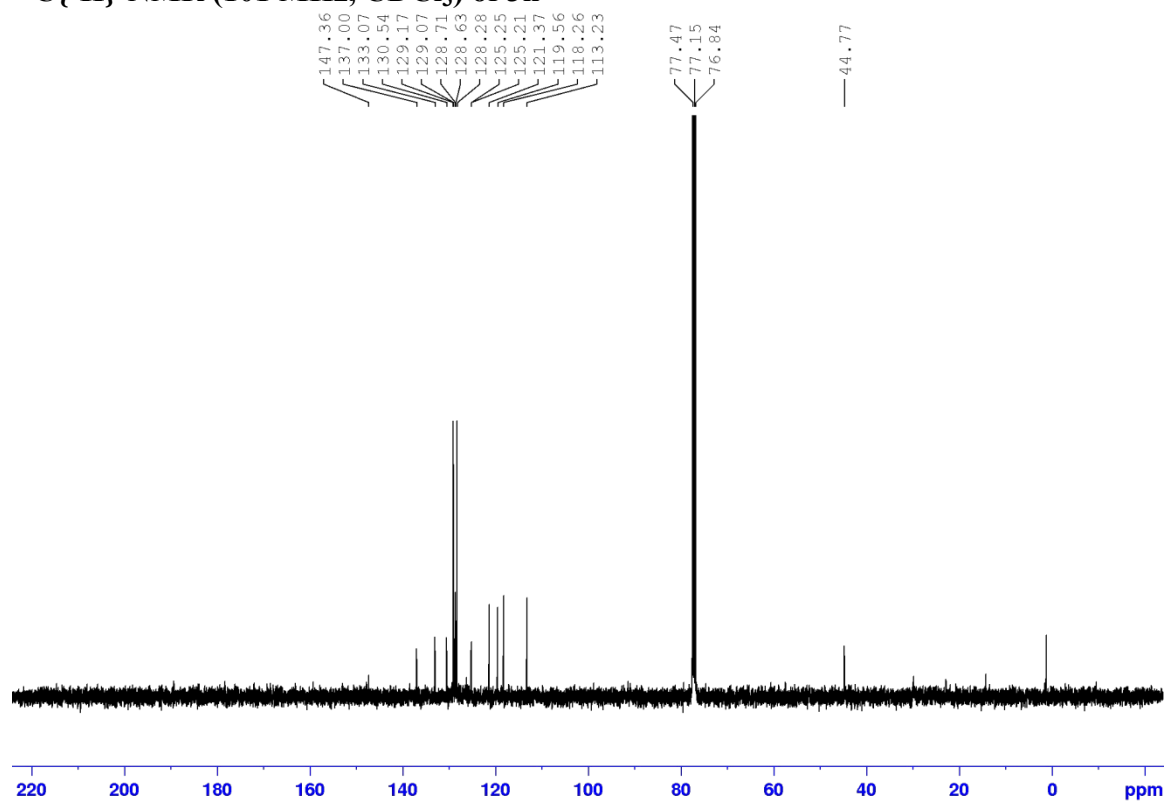

**DEPT-135 (101 MHz,  $\text{CDCl}_3$ ) of 3n**

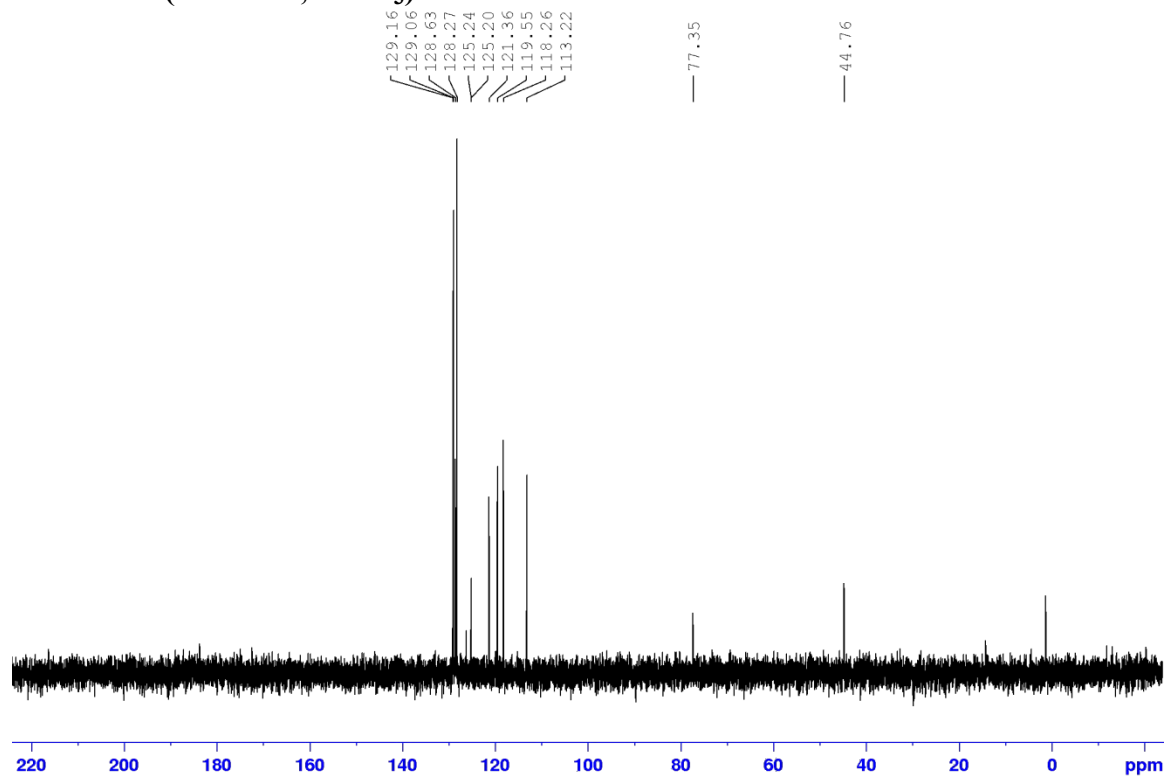

# <sup>19</sup>F-NMR (377 MHz, CDCl<sub>3</sub>) of 3n

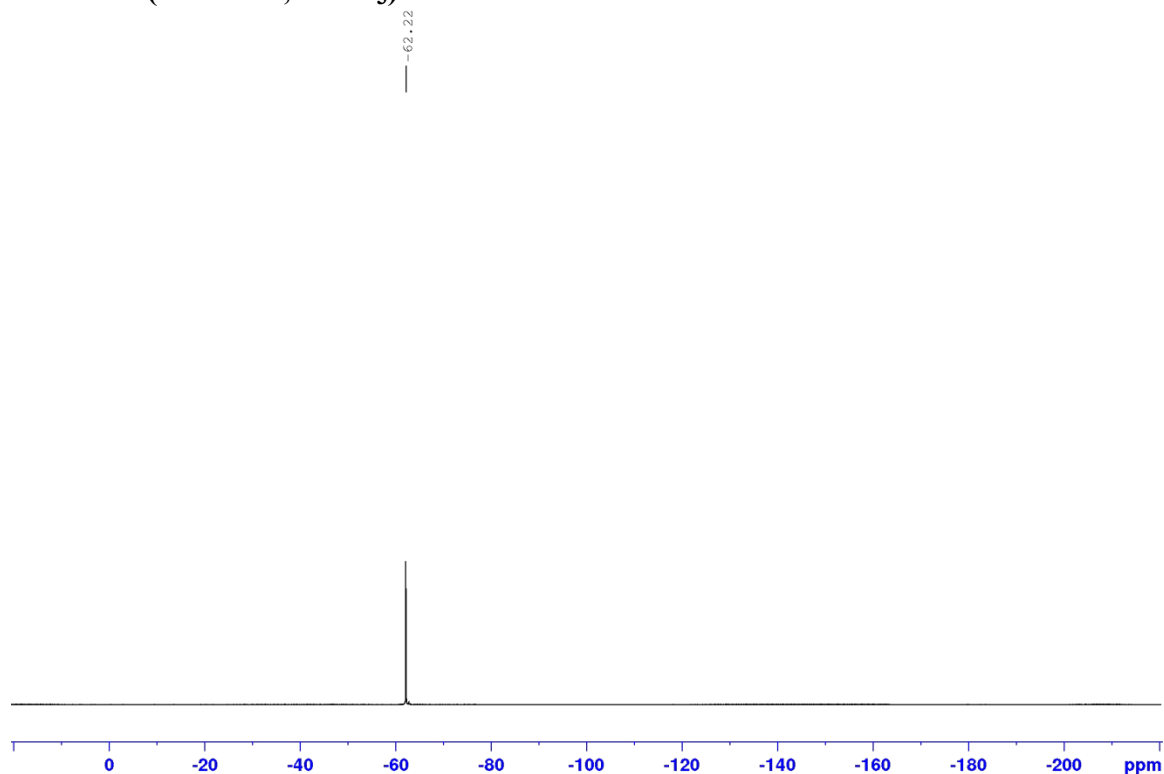

## HRMS of 3n

### Elemental Composition Report

Page 1

#### Single Mass Analysis

Tolerance = 50.0 PPM / DBE: min = -1.5, max = 50.0

Element prediction: Off

Number of isotope peaks used for i-FIT = 3

Monoisotopic Mass, Even Electron Ions

32 formula(e) evaluated with 1 results within limits (up to 3 closest results for each mass)

Elements Used:

C: 0-34 H: 0-200 N: 0-4 F: 0-3

SM-328

QMI DIVISION, CSIR-IIIM JAMMU  
Xevo G2-XS QTOF YFC2015

07-Dec-2021

15:50:30

071221\_23 46 (0.913) Cm (46:47)

1: TOF MS ES+  
2.63e+006

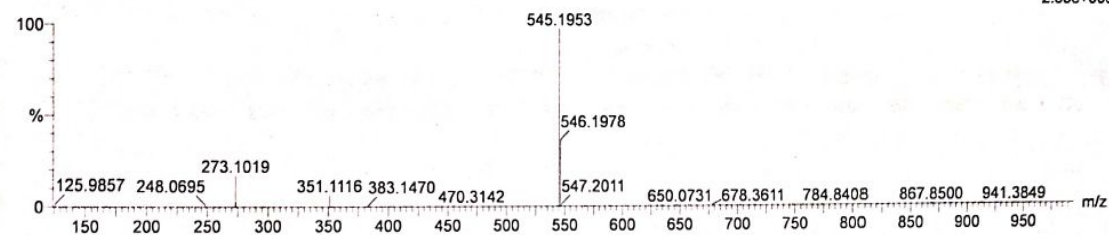

Minimum: -1.5  
Maximum: 2.0 50.0 50.0

| Mass     | Calc. Mass | mDa | PPM | DBE  | i-FIT | Norm | Conf(%) | Formula       |
|----------|------------|-----|-----|------|-------|------|---------|---------------|
| 545.1953 | 545.1953   | 0.0 | 0.0 | 23.5 | 36.2  | n/a  | n/a     | C34 H24 N4 F3 |

**$^1\text{H-NMR}$  (400 MHz,  $\text{CDCl}_3$ ) of 3o**

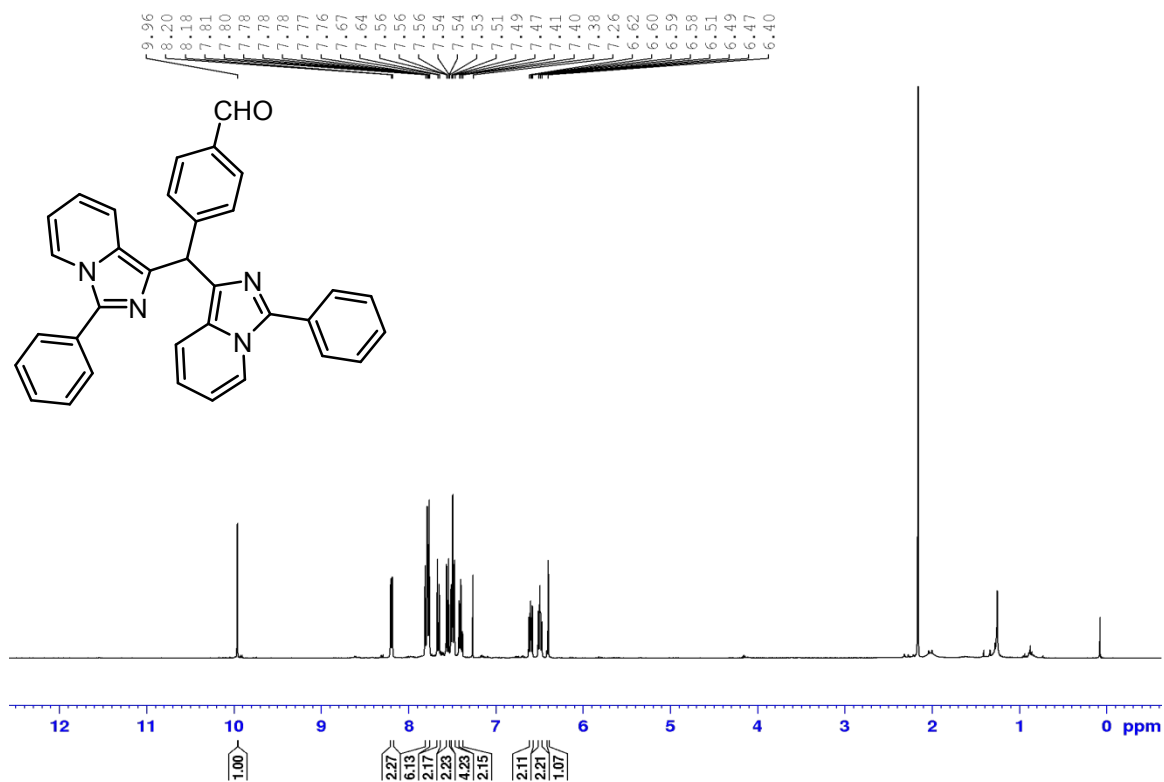

**$^{13}\text{C}\{^1\text{H}\}$ -NMR (101 MHz,  $\text{CDCl}_3$ ) of 3o**

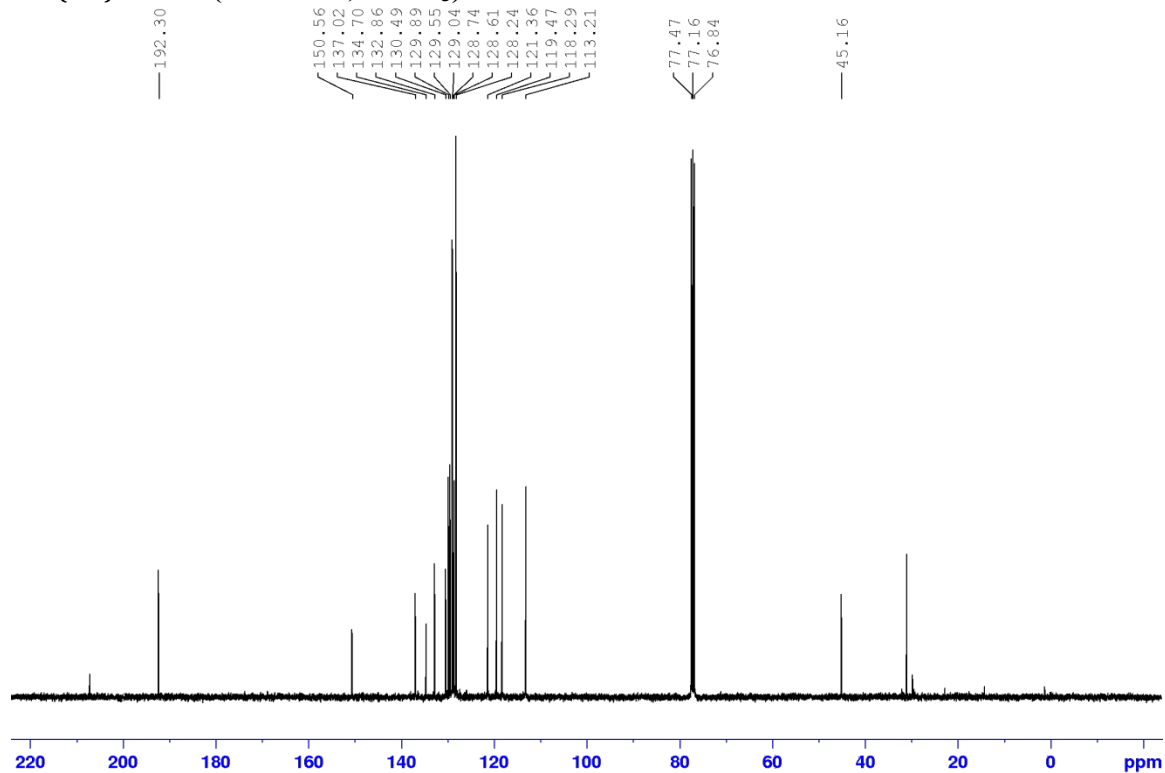

### DEPT-135 (101 MHz, CDCl<sub>3</sub>) of 3o

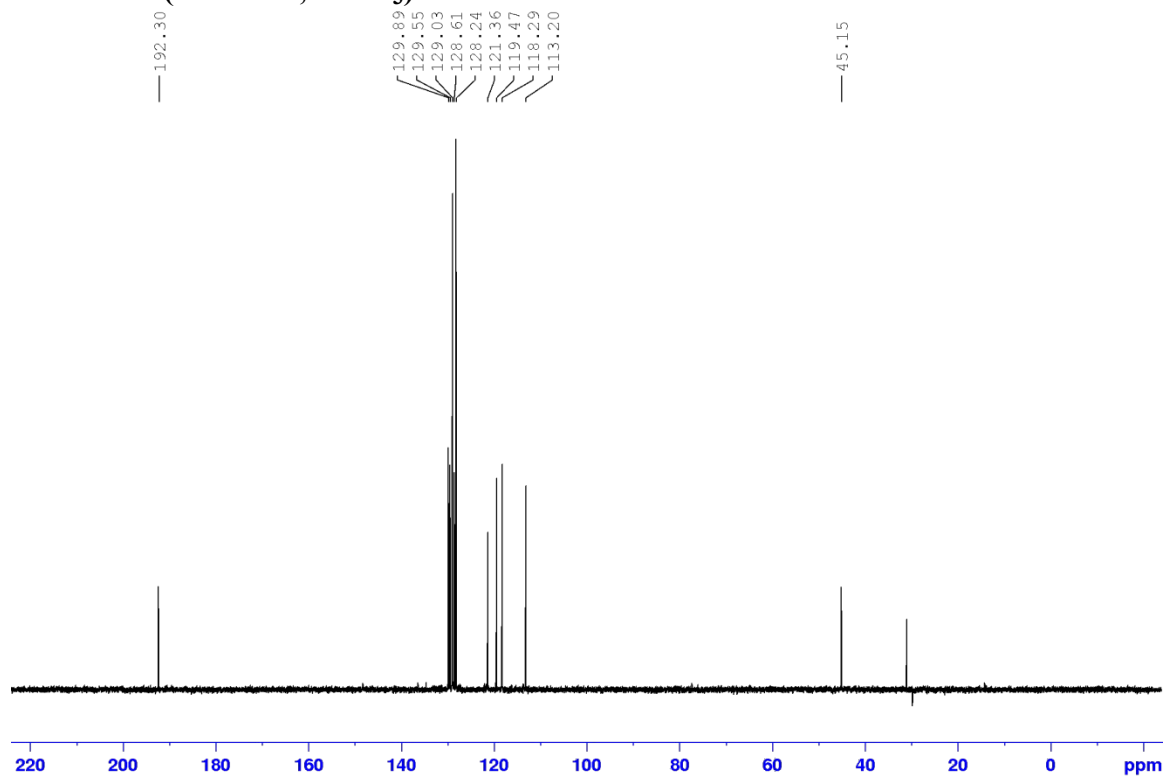

### HRMS of 3o

#### Elemental Composition Report

Page 1

#### Single Mass Analysis

Tolerance = 100.0 PPM / DBE: min = -1.5, max = 50.0  
 Element prediction: Off  
 Number of isotope peaks used for i-FIT = 3

Monoisotopic Mass, Even Electron Ions  
 25 formula(e) evaluated with 1 results within limits (up to 3 closest results for each mass)  
 Elements Used:  
 C: 0-34 H: 0-100 N: 0-4 O: 0-1  
 SM-423

QMI DIVISION, CSIR-IIIM JAMMU  
 Xevo G2-XS QTOF YFC2015

30-Jun-2023  
 12:36:36  
 1: TOF MS ES+  
 4.77e+006

300623\_06 4 (0.104)

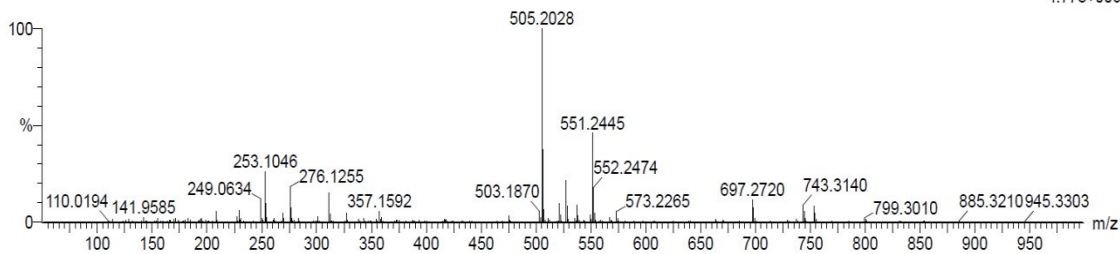

Minimum: -1.5  
 Maximum: 2.0 100.0 50.0

| Mass     | Calc. Mass | mDa | PPM | DBE  | i-FIT | Norm | Conf (%) | Formula                                          |
|----------|------------|-----|-----|------|-------|------|----------|--------------------------------------------------|
| 505.2028 | 505.2028   | 0.0 | 0.0 | 24.5 | 798.7 | n/a  | n/a      | C <sub>34</sub> H <sub>25</sub> N <sub>4</sub> O |

### $^1\text{H-NMR}$ (400 MHz, $\text{CDCl}_3$ ) of 3p

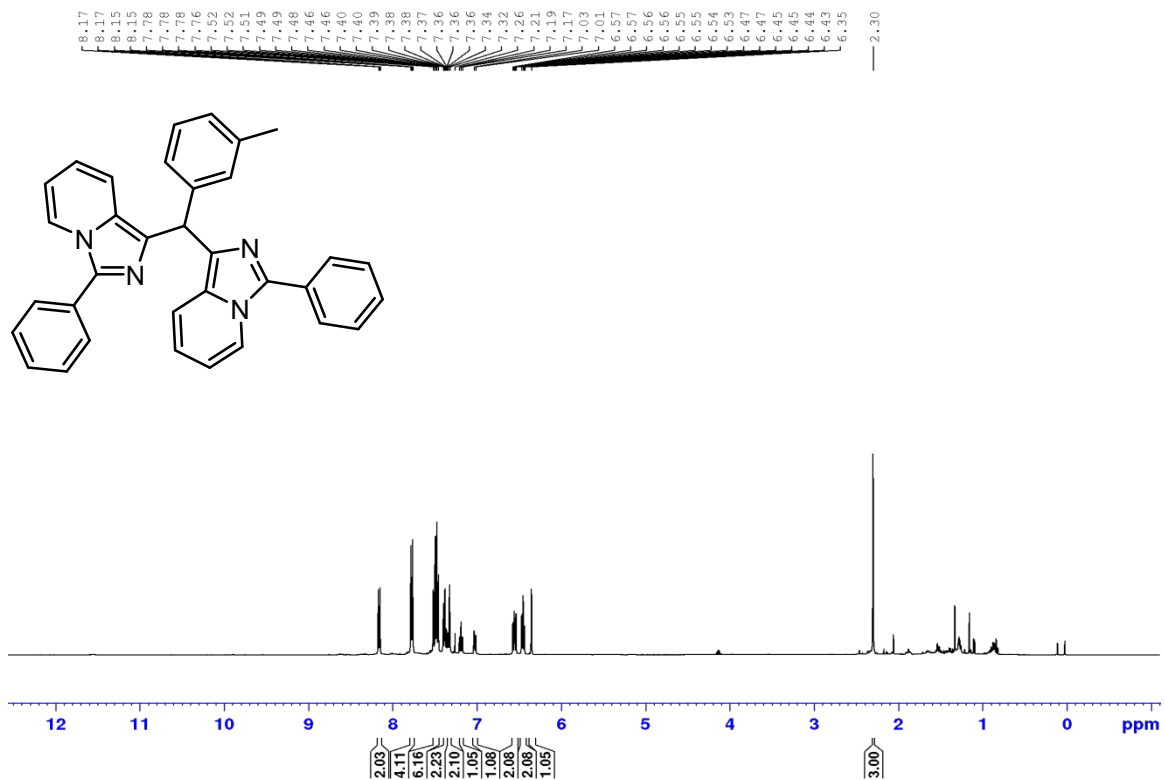

### $^{13}\text{C}\{^1\text{H}\}$ -NMR (101 MHz, $\text{CDCl}_3$ ) of 3p

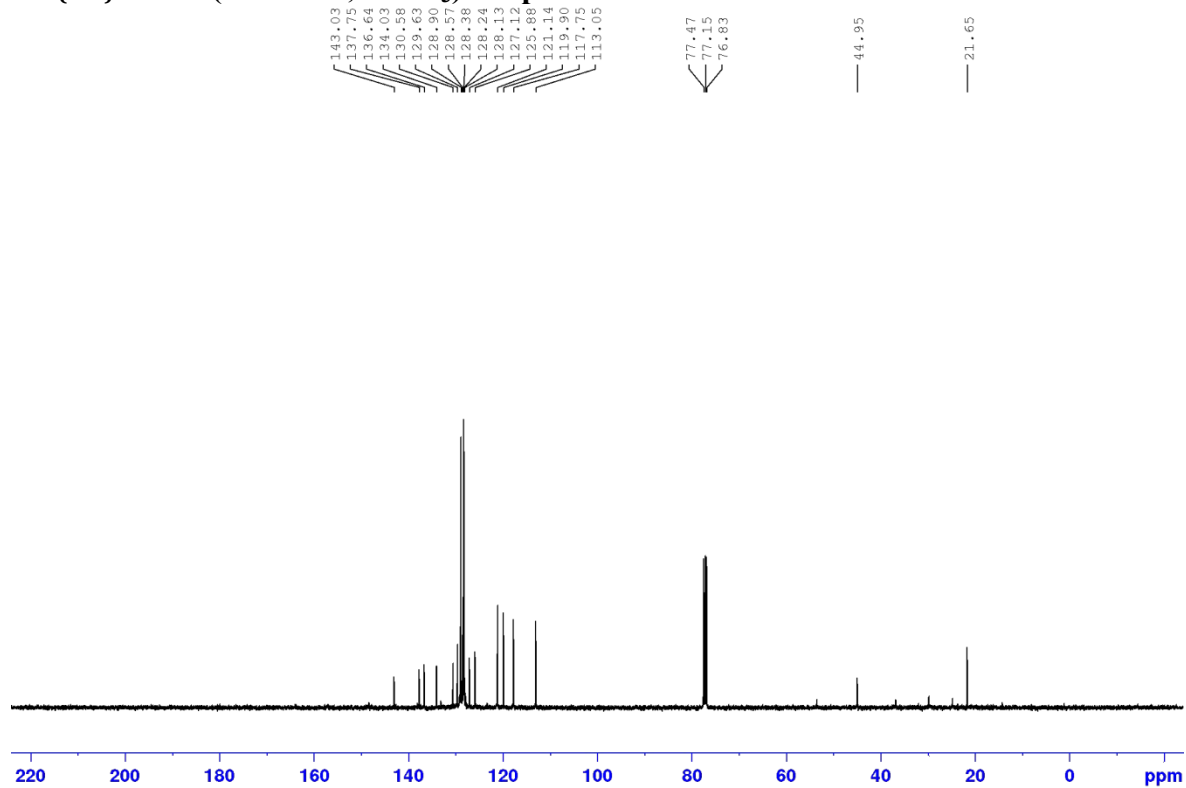



DEPT-135 (101 MHz, CDCl<sub>3</sub>) of 3p

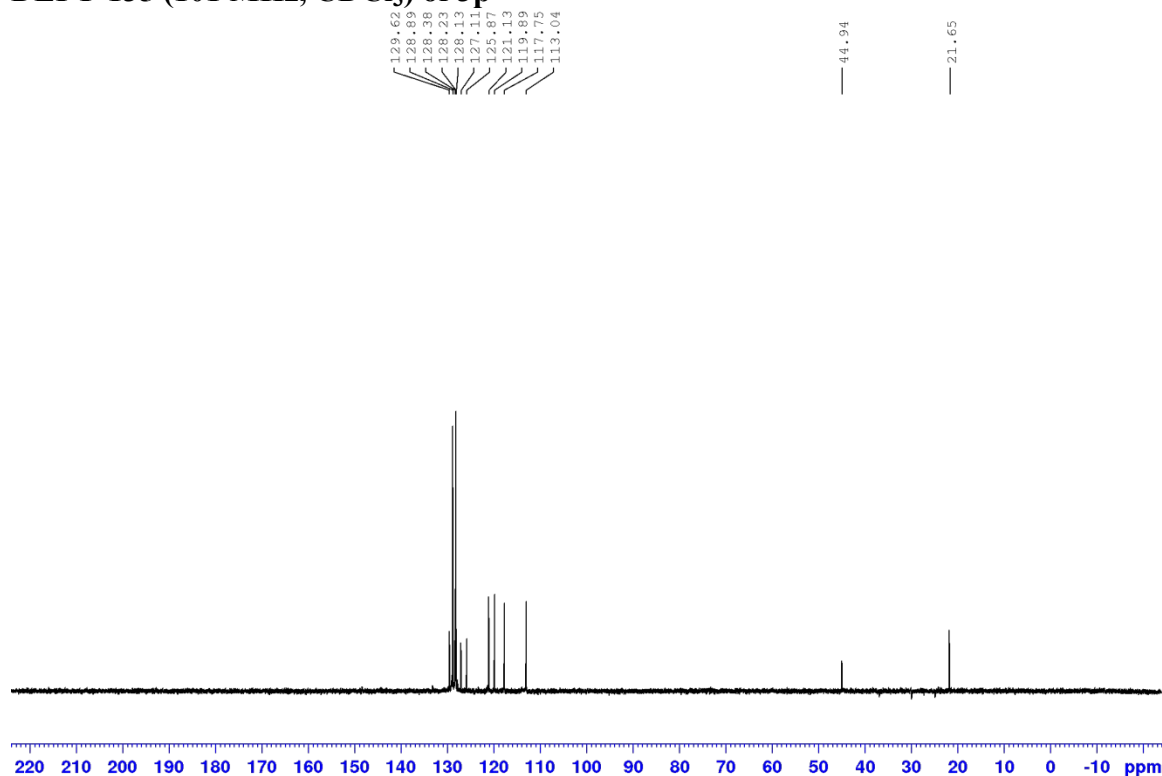

HRMS of 3p

Elemental Composition Report

Page 1

Single Mass Analysis

Tolerance = 50.0 PPM / DBE: min = -1.5, max = 50.0

Element prediction: Off

Number of isotope peaks used for i-FIT = 3

Monoisotopic Mass, Even Electron Ions

13 formula(e) evaluated with 1 results within limits (up to 3 closest results for each mass)

Elements Used:

C: 0-34 H: 0-100 N: 0-4

SM-366

QMI DIVISION, CSIR-IIIM JAMMU  
Xevo G2-XS QTOF YFC2015

29-Jul-2022

12:01:42

1: TOF MS ES+

5.73e+006

290722\_07 6 (0.138)

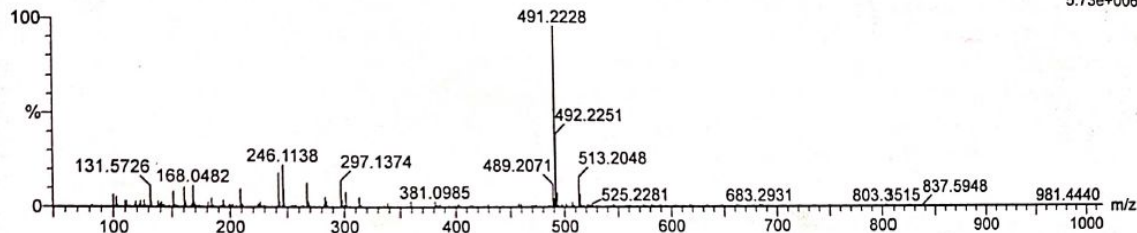

Minimum: -1.5  
Maximum: 2.0 50.0 50.0

| Mass     | Calc. Mass | mDa  | PPM  | DBE  | i-FIT | Norm | Conf (%) | Formula    |
|----------|------------|------|------|------|-------|------|----------|------------|
| 491.2228 | 491.2236   | -0.8 | -1.6 | 23.5 | 804.5 | n/a  | n/a      | C34 H27 N4 |

### $^1\text{H-NMR}$ (400 MHz, $\text{CDCl}_3$ ) of **3q**

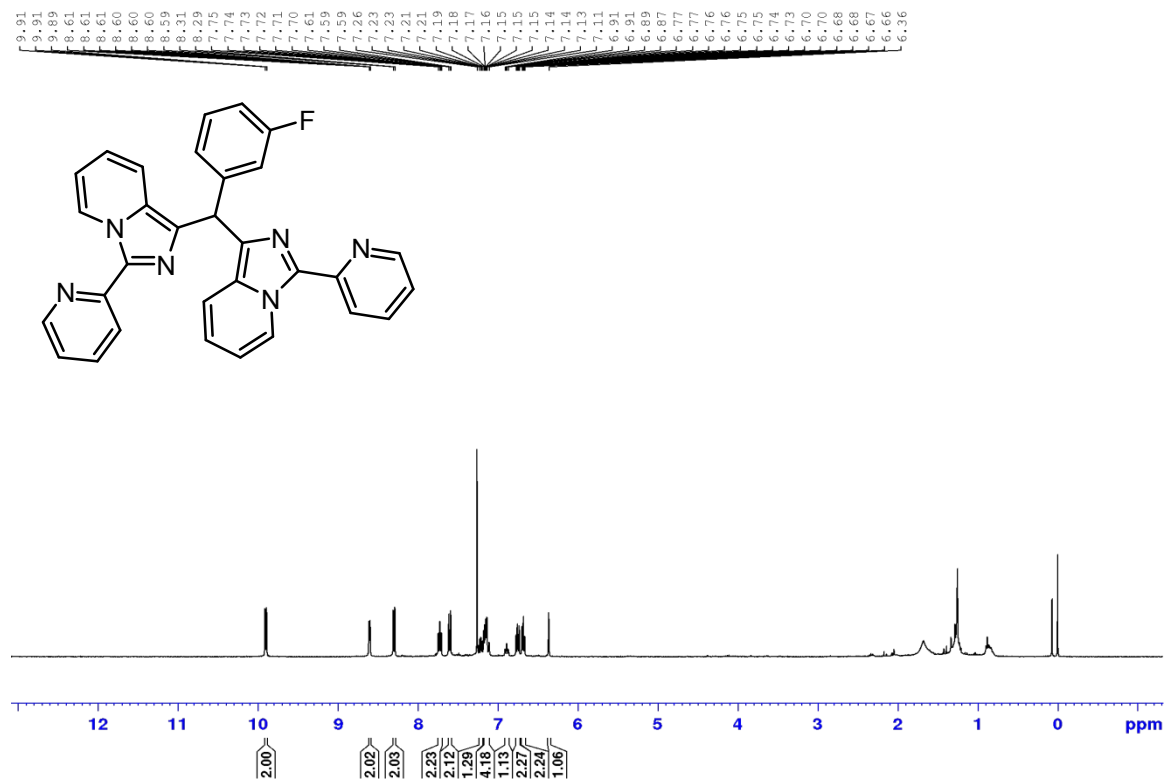

### $^{13}\text{C}\{^1\text{H}\}$ -NMR (101 MHz, $\text{CDCl}_3$ ) of **3q**

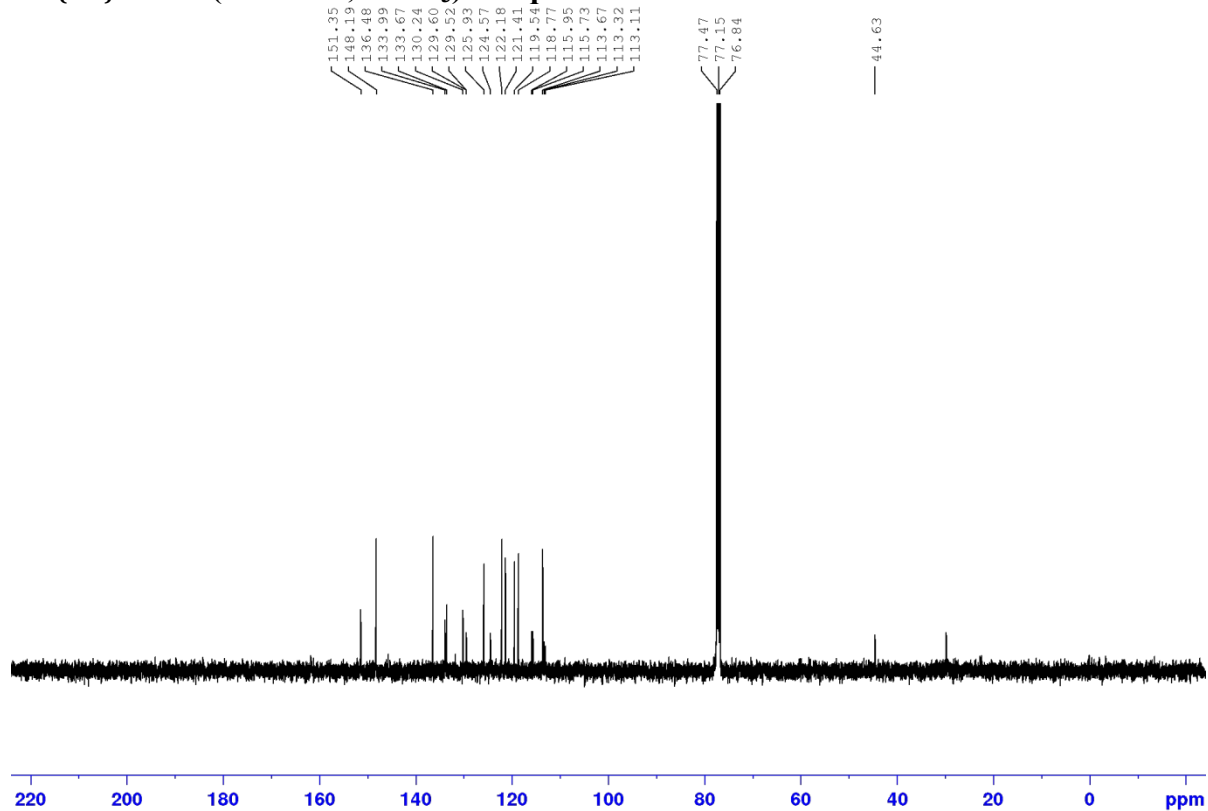

DEPT-135 (101 MHz, CDCl<sub>3</sub>) of 3q

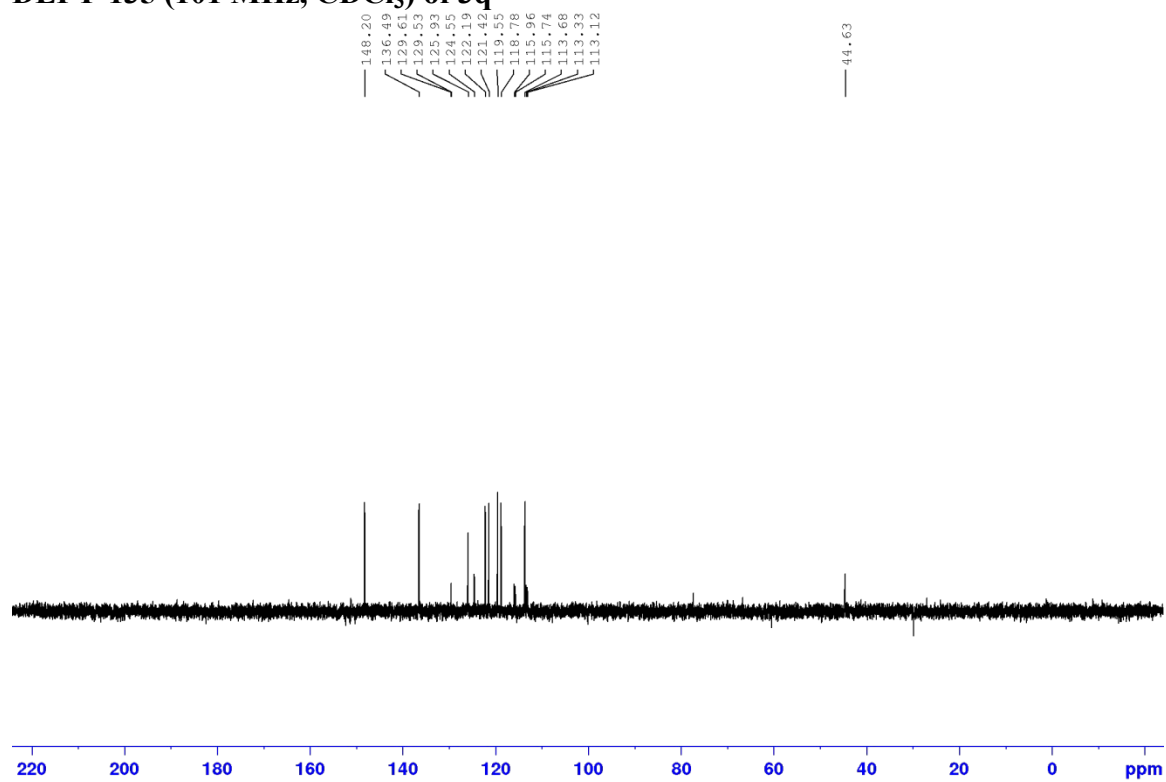

<sup>19</sup>F-NMR (377 MHz, CDCl<sub>3</sub>) of 3q

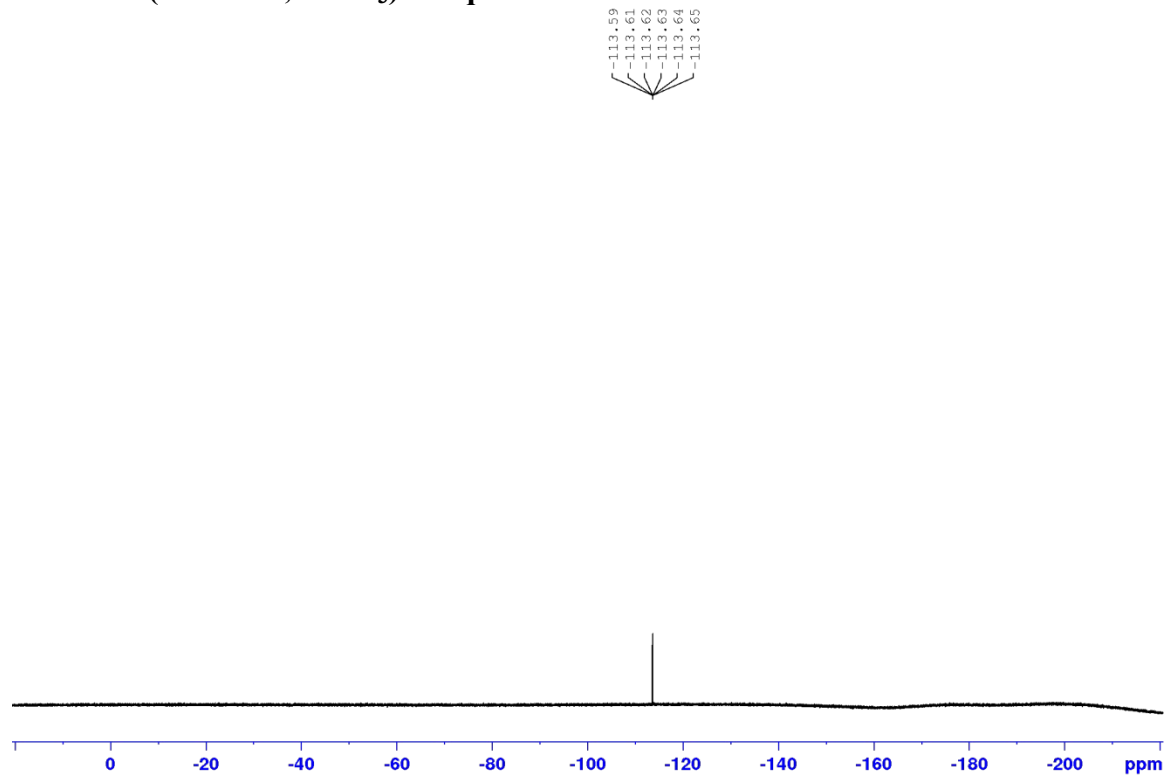

# HRMS of 3q

## Elemental Composition Report

Page 1

### Single Mass Analysis

Tolerance = 100.0 PPM / DBE: min = -1.5, max = 50.0

Element prediction: Off

Number of isotope peaks used for i-FIT = 3

Monoisotopic Mass, Even Electron Ions

25 formula(e) evaluated with 1 results within limits (up to 3 closest results for each mass)

Elements Used:

C: 0-31 H: 0-100 N: 0-6 F: 0-1

SM-415

QMI DIVISION, CSIR-IIIM JAMMU  
Xevo G2-XS QTOF YFC2015

16-Mar-2023

13:00:16

1: TOF MS ES+

2.36e+006

160323\_16 9 (0.208)

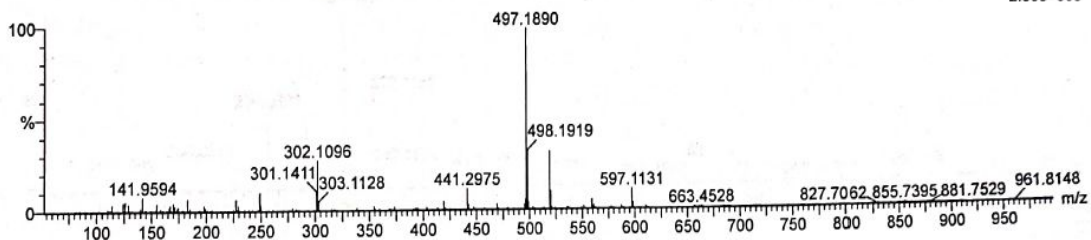

Minimum: -1.5  
Maximum: 2.0 100.0 50.0

| Mass     | Calc. Mass | mDa | PPM | DBE  | i-FIT | Norm | Conf (%) | Formula      |
|----------|------------|-----|-----|------|-------|------|----------|--------------|
| 497.1890 | 497.1890   | 0.0 | 0.0 | 23.5 | 773.3 | n/a  | n/a      | C31 H22 N6 F |

## <sup>1</sup>H-NMR (400 MHz, CDCl<sub>3</sub>) of 3r

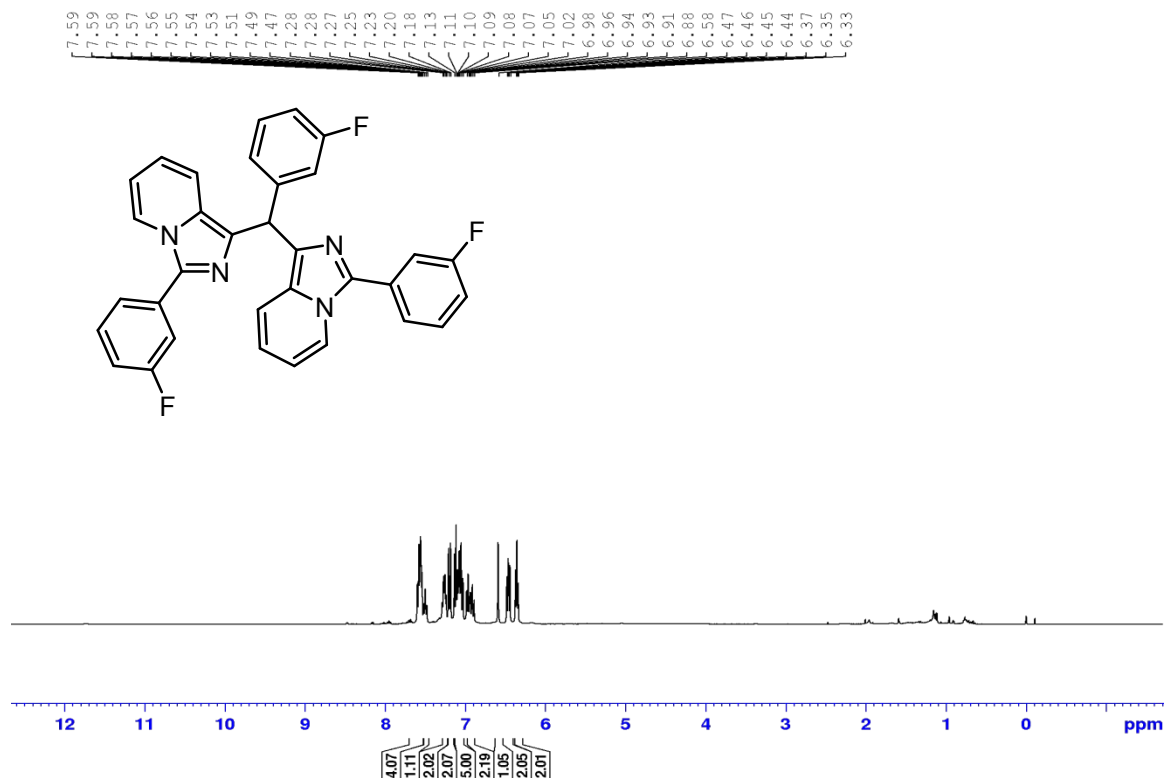

**$^{13}\text{C}\{^1\text{H}\}$ -NMR (101 MHz,  $\text{CDCl}_3$ ) of 3r**

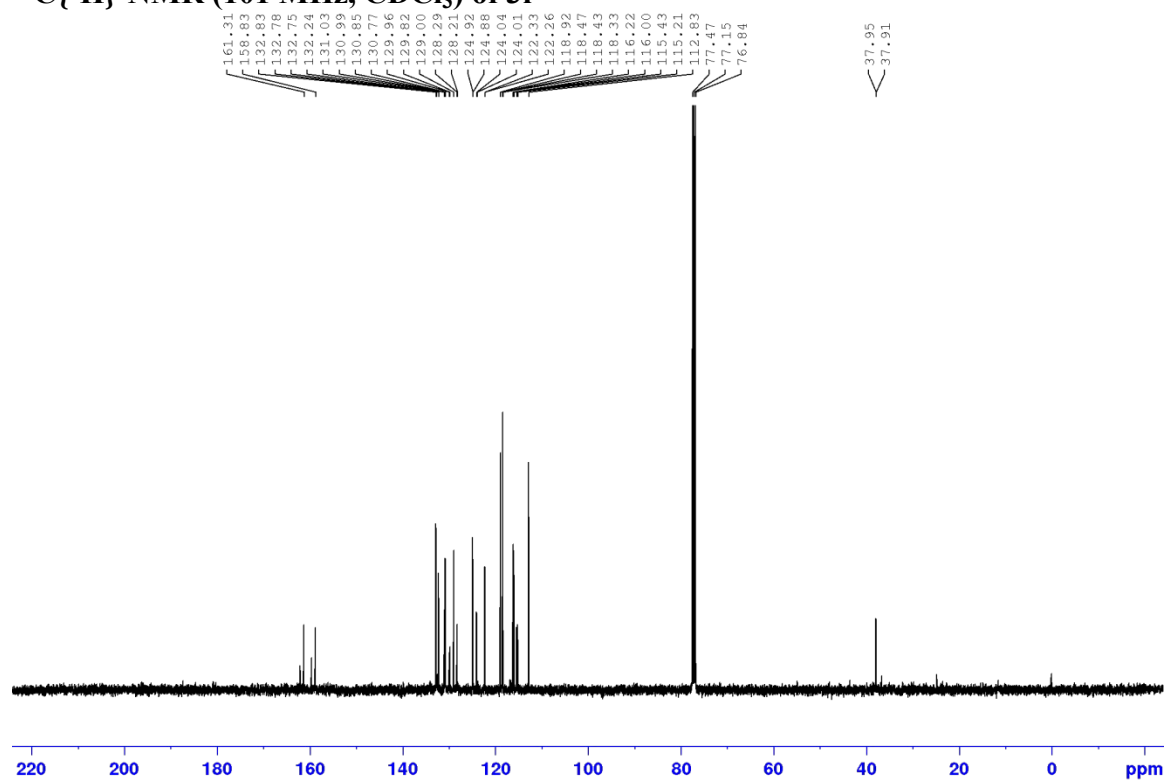

**DEPT-135 (101 MHz,  $\text{CDCl}_3$ ) of 3r**

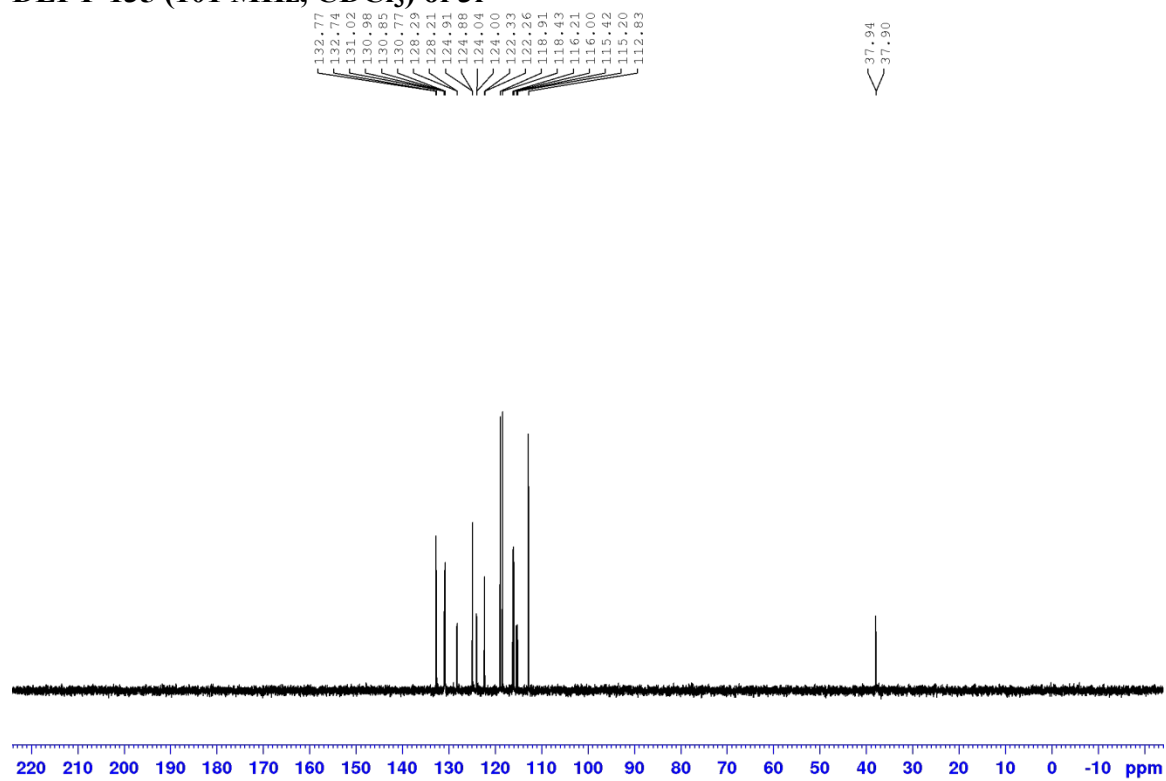

**<sup>19</sup>F-NMR (377 MHz, CDCl<sub>3</sub>) of 3r**

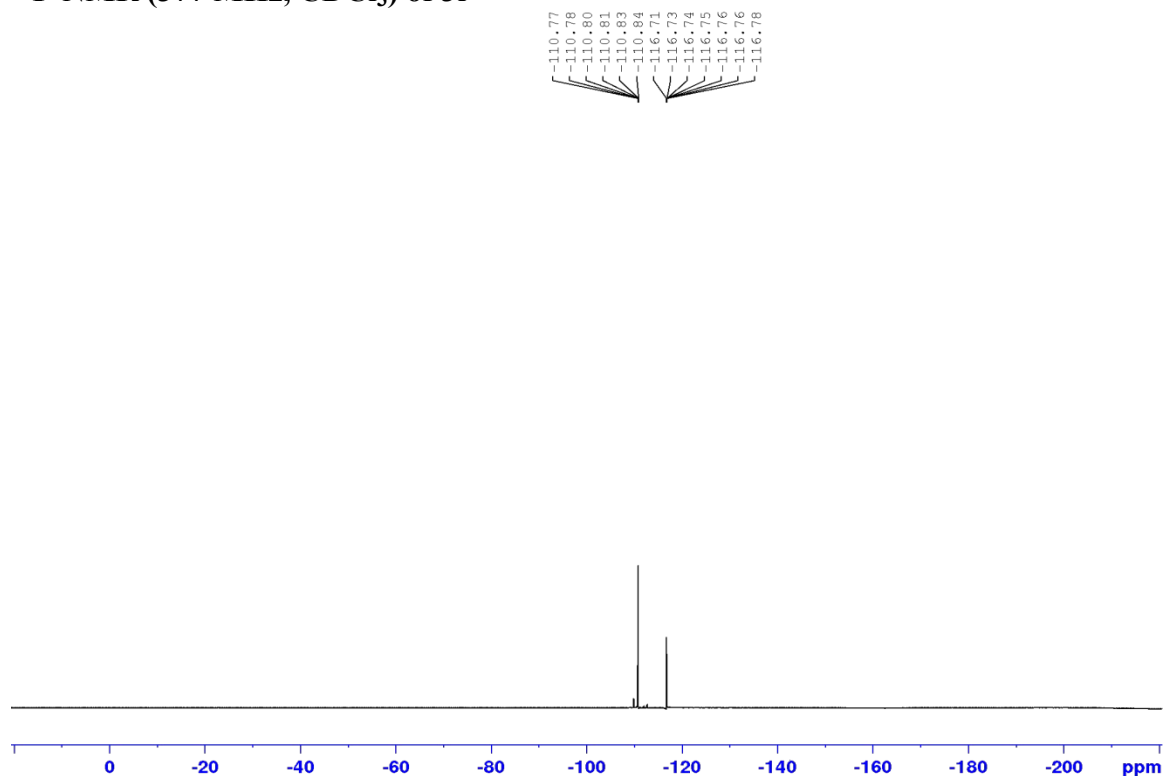

**HRMS of 3r**

**Elemental Composition Report**

Page 1

Mass

**Single Mass Analysis**

Tolerance = 50.0 PPM / DBE: min = -1.5, max = 50.0

Element prediction: Off

Number of isotope peaks used for i-FIT = 3

Monoisotopic Mass, Even Electron Ions

32 formula(e) evaluated with 1 results within limits (up to 3 closest results for each mass)

Elements Used:

C: 0-33 H: 0-100 N: 0-4 F: 0-3

SM-372 (B)

QMI DIVISION, CSIR-IIIM JAMMU  
Xevo G2-XS QTOF YFC2015

13-Sep-2022  
12:29:01  
1: TOF MS ES+  
1.32e+007

130922\_07 24 (0.482)

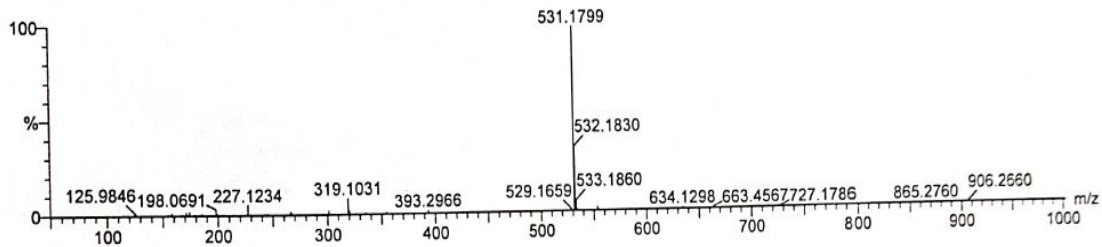

Minimum: -1.5  
Maximum: 2.0 50.0 50.0

| Mass     | Calc. Mass | mDa | PPM | DBE  | i-FIT | Norm | Conf (%) | Formula       |
|----------|------------|-----|-----|------|-------|------|----------|---------------|
| 531.1799 | 531.1797   | 0.2 | 0.4 | 23.5 | 653.6 | n/a  | n/a      | C33 H22 N4 F3 |

**$^1\text{H-NMR}$  (400 MHz,  $\text{CDCl}_3$ ) of 3s**

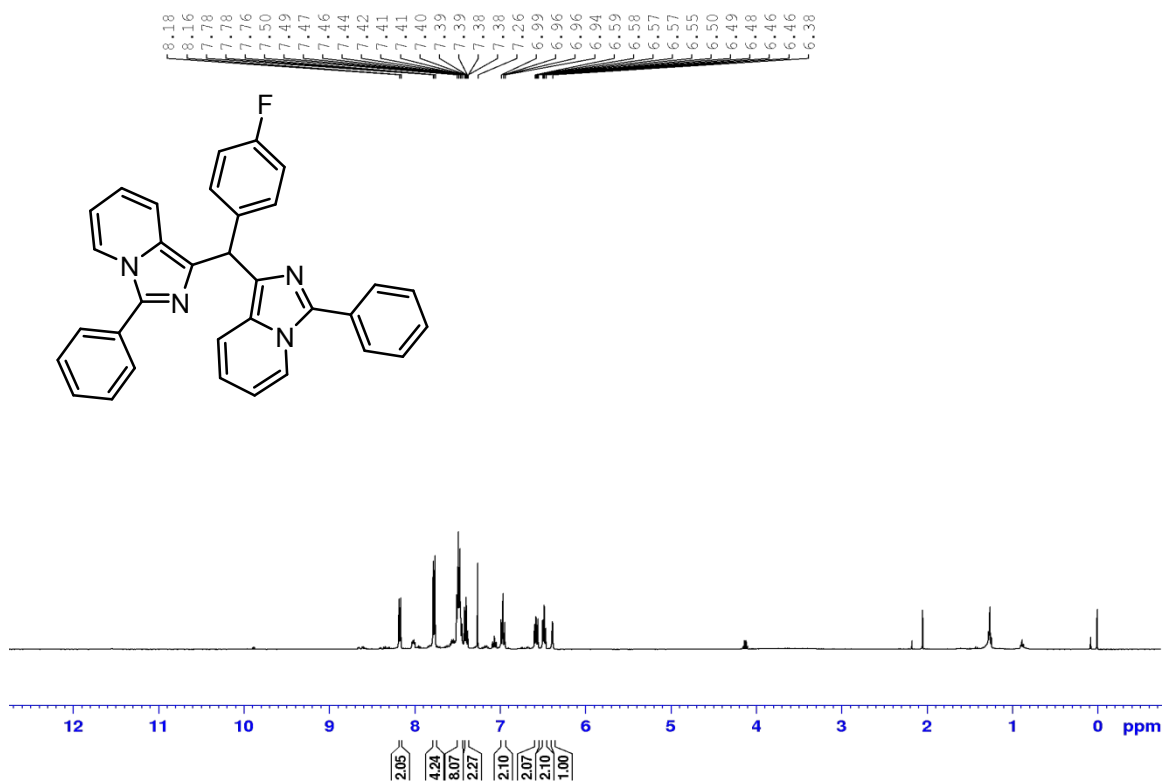

**$^{13}\text{C}\{^1\text{H}\}$ -NMR (101 MHz,  $\text{CDCl}_3$ ) of 3s**

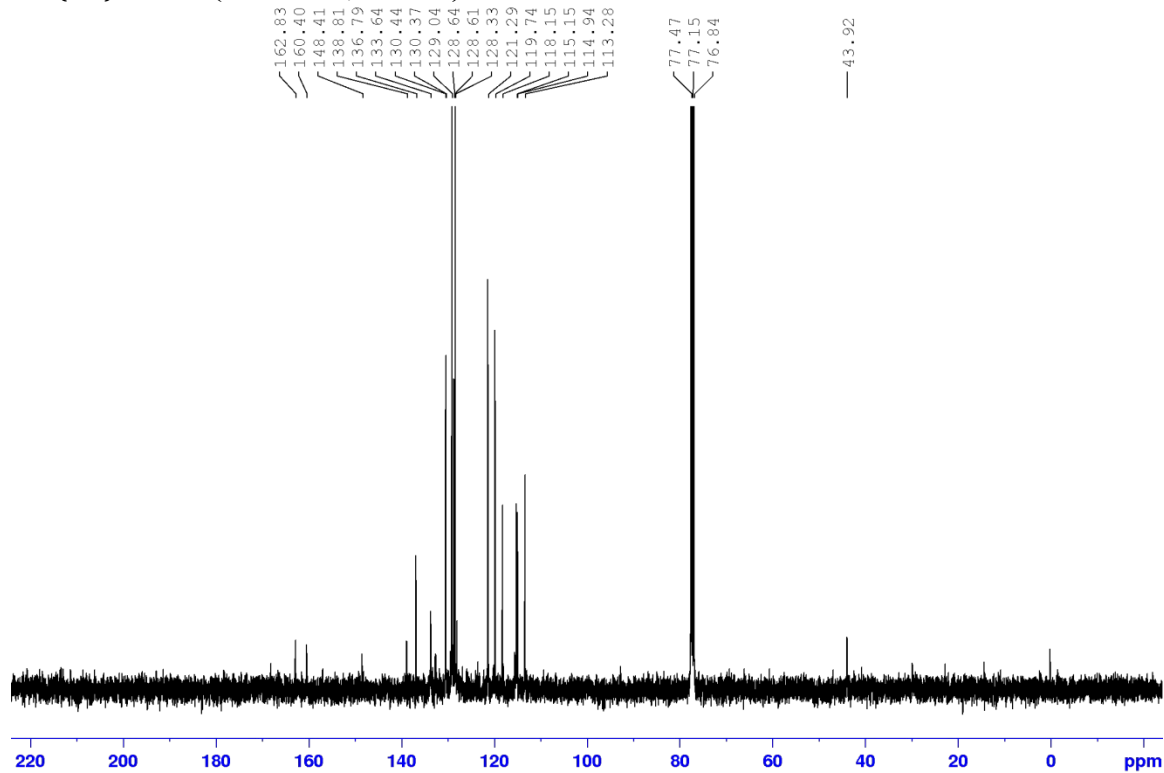

DEPT-135 (101 MHz, CDCl<sub>3</sub>) of 3s

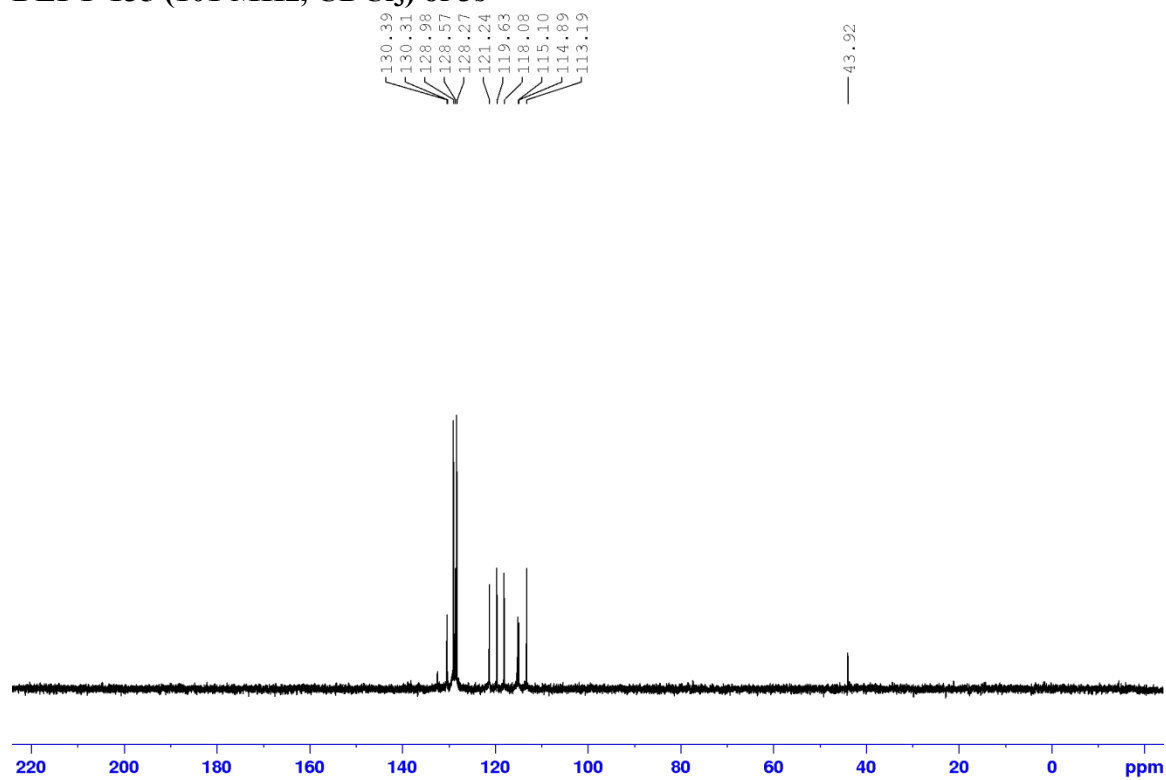

<sup>19</sup>F-NMR (377 MHz, CDCl<sub>3</sub>) of 3s

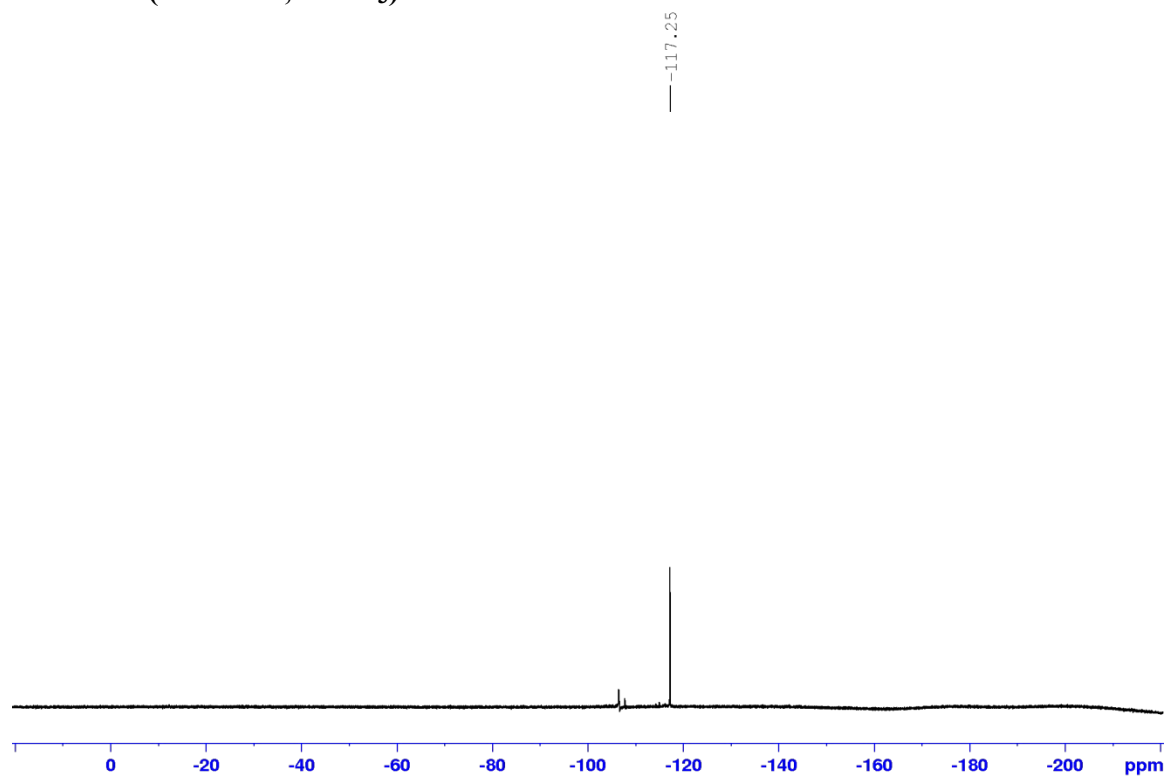



# HRMS of 3s

## Elemental Composition Report

Page 1

### Single Mass Analysis

Tolerance = 100.0 PPM / DBE: min = -1.5, max = 50.0

Element prediction: Off

Number of isotope peaks used for i-FIT = 3

Monoisotopic Mass, Even Electron Ions

21 formula(e) evaluated with 1 results within limits (up to 3 closest results for each mass)

Elements Used:

C: 0-33 H: 0-100 N: 0-4 F: 0-1

SM-420

QMI DIVISION, CSIR-IIIM JAMMU  
Xevo G2-XS QTOF YFC2015

30-Jun-2023

12:28:53

1: TOF MS ES+

4.64e+006

300623\_03 7 (0.155)

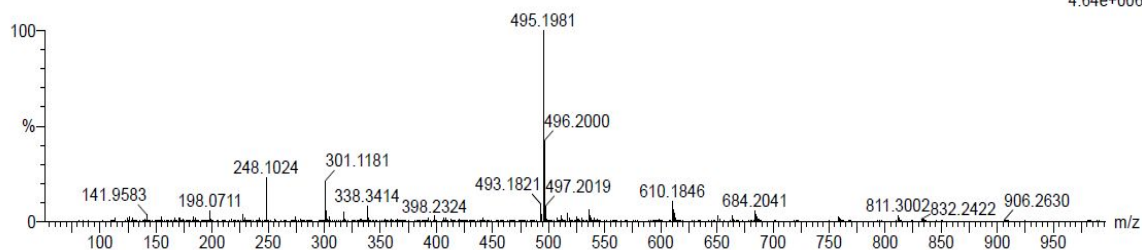

Minimum: -1.5  
Maximum: 2.0 100.0 50.0

| Mass     | Calc. Mass | mDa  | PPM  | DBE  | i-FIT | Norm | Conf (%) | Formula      |
|----------|------------|------|------|------|-------|------|----------|--------------|
| 495.1981 | 495.1985   | -0.4 | -0.8 | 23.5 | 860.5 | n/a  | n/a      | C33 H24 N4 F |

## <sup>1</sup>H-NMR (400 MHz, CDCl<sub>3</sub>) of 3t

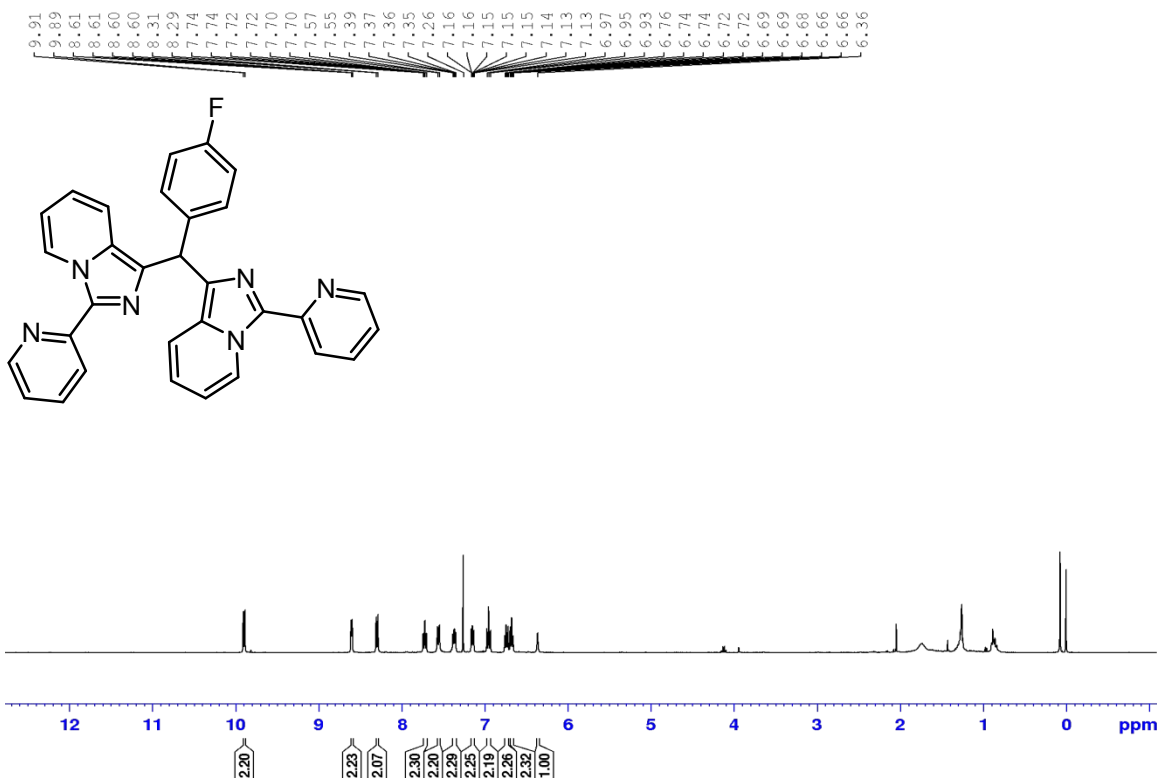

**$^{13}\text{C}\{^1\text{H}\}$ -NMR (101 MHz,  $\text{CDCl}_3$ ) of 3t**

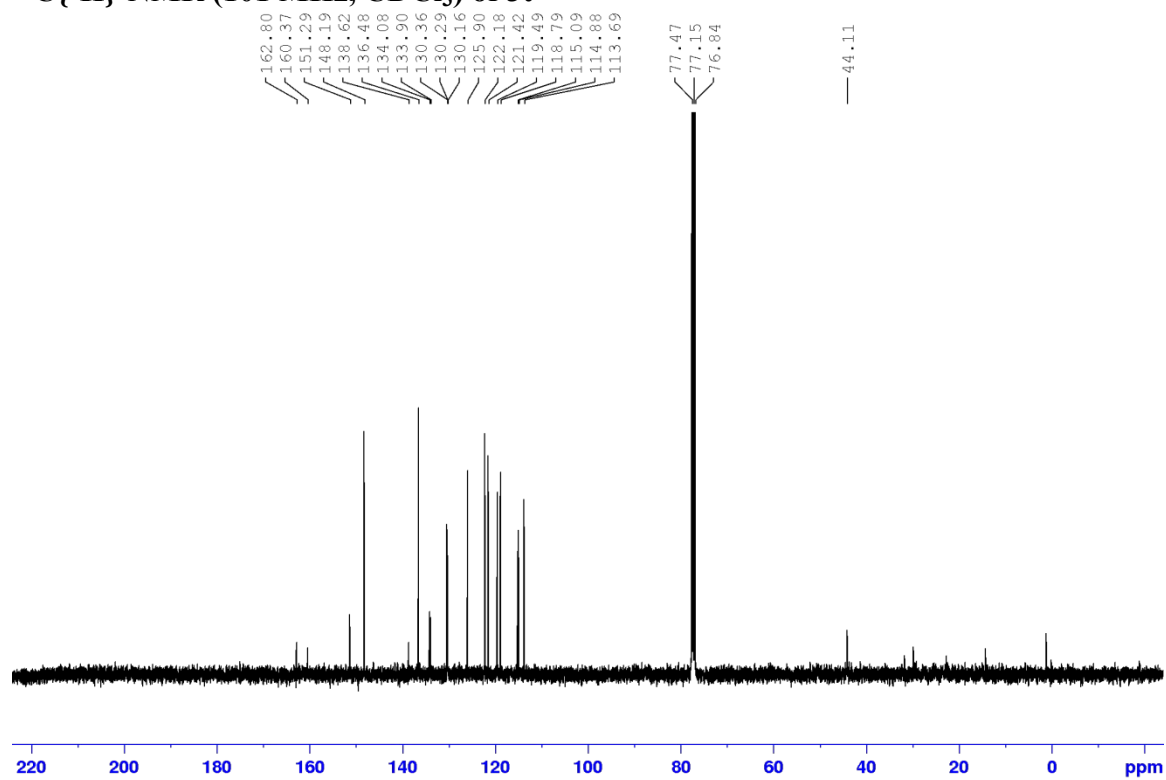

**DEPT-135 (101 MHz,  $\text{CDCl}_3$ ) of 3t**

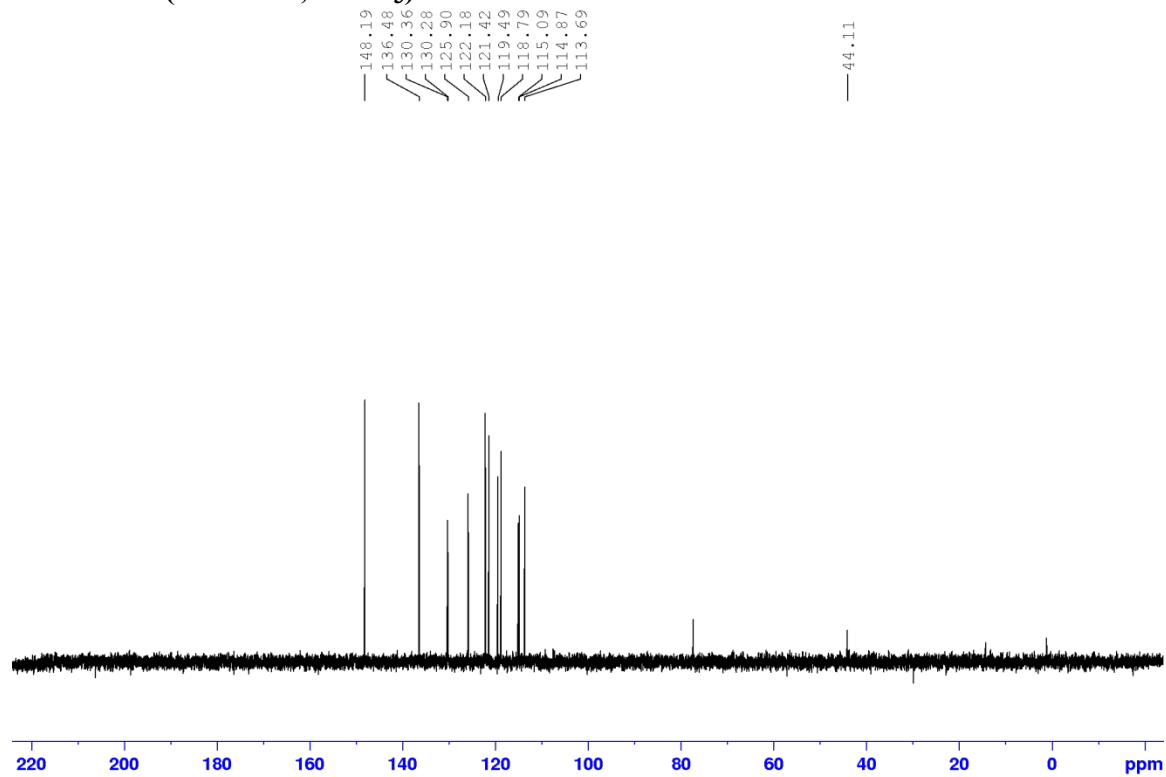

# <sup>19</sup>F-NMR (377 MHz, CDCl<sub>3</sub>) of 3t

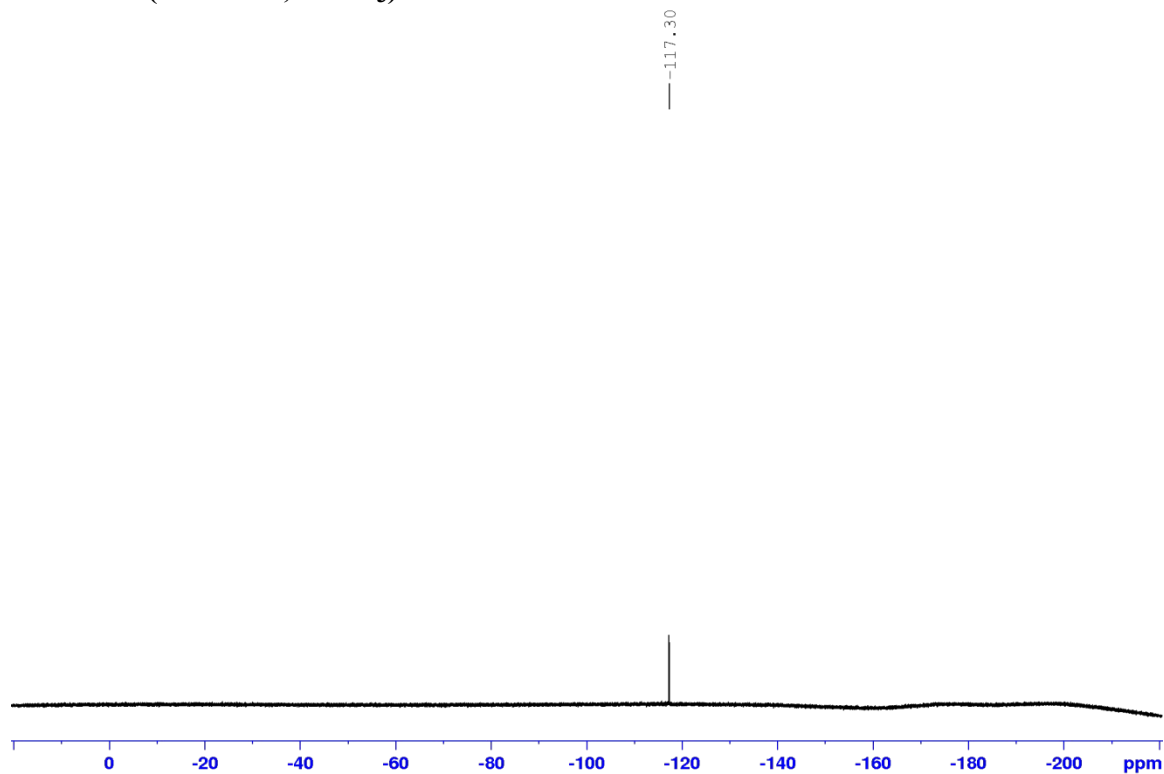

## HRMS of 3t

### Elemental Composition Report

Page 1

#### Single Mass Analysis

Tolerance = 100.0 PPM / DBE: min = -1.5, max = 50.0

Element prediction: Off

Number of isotope peaks used for i-FIT = 3

Monoisotopic Mass, Even Electron Ions

25 formula(e) evaluated with 1 results within limits (up to 3 closest results for each mass)

Elements Used:

C: 0-31 H: 0-100 N: 0-6 F: 0-1

SM-421

QMI DIVISION, CSIR-IIIM JAMMU  
Xevo G2-XS QTOF YFC2015

30-Jun-2023

12:31:27

1: TOF MS ES+

9.81e+006

300623\_04 9 (0.208)

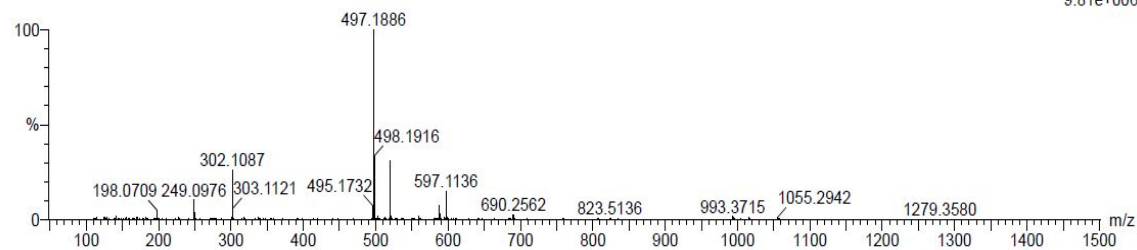

Minimum: -1.5

Maximum: 2.0 100.0 50.0

| Mass     | Calc. Mass | mDa  | PPM  | DBE  | i-FIT | Norm | Conf(%) | Formula      |
|----------|------------|------|------|------|-------|------|---------|--------------|
| 497.1886 | 497.1890   | -0.4 | -0.8 | 23.5 | 803.9 | n/a  | n/a     | C31 H22 N6 F |

**$^1\text{H-NMR}$  (400 MHz,  $\text{CDCl}_3$ ) of 3u**

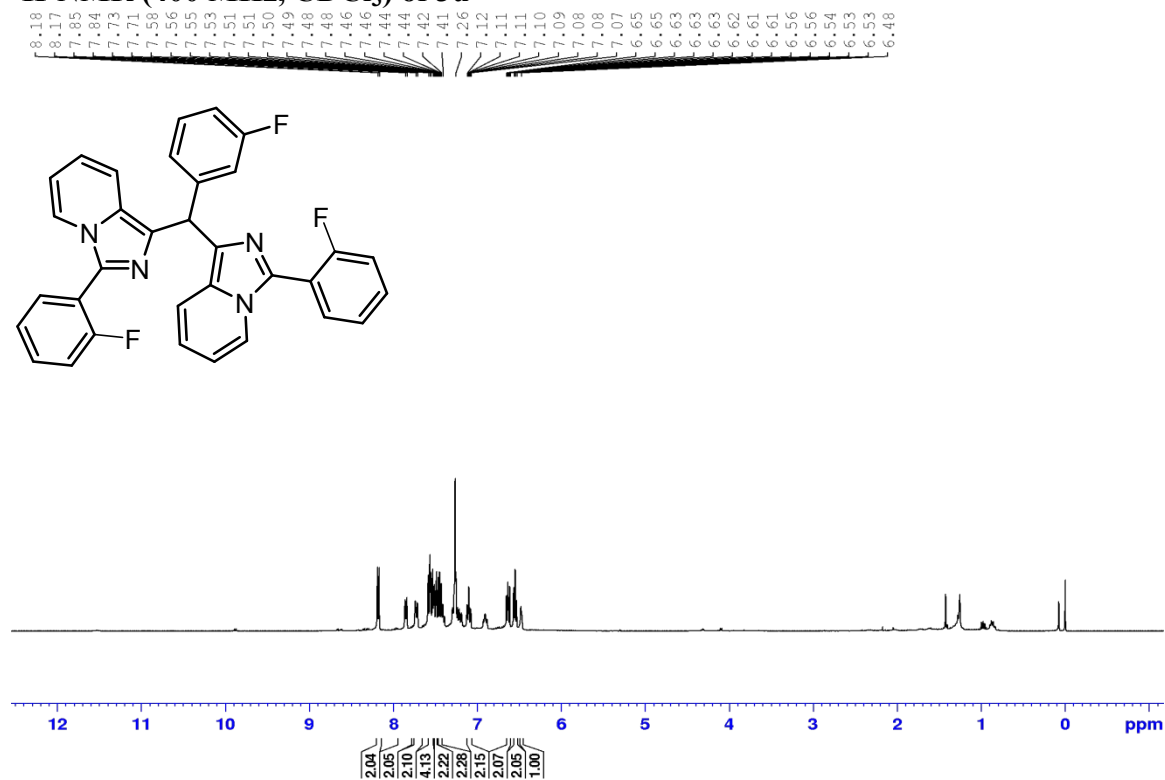

**$^{13}\text{C}\{^1\text{H}\}$ -NMR (101 MHz,  $\text{CDCl}_3$ ) of 3u**

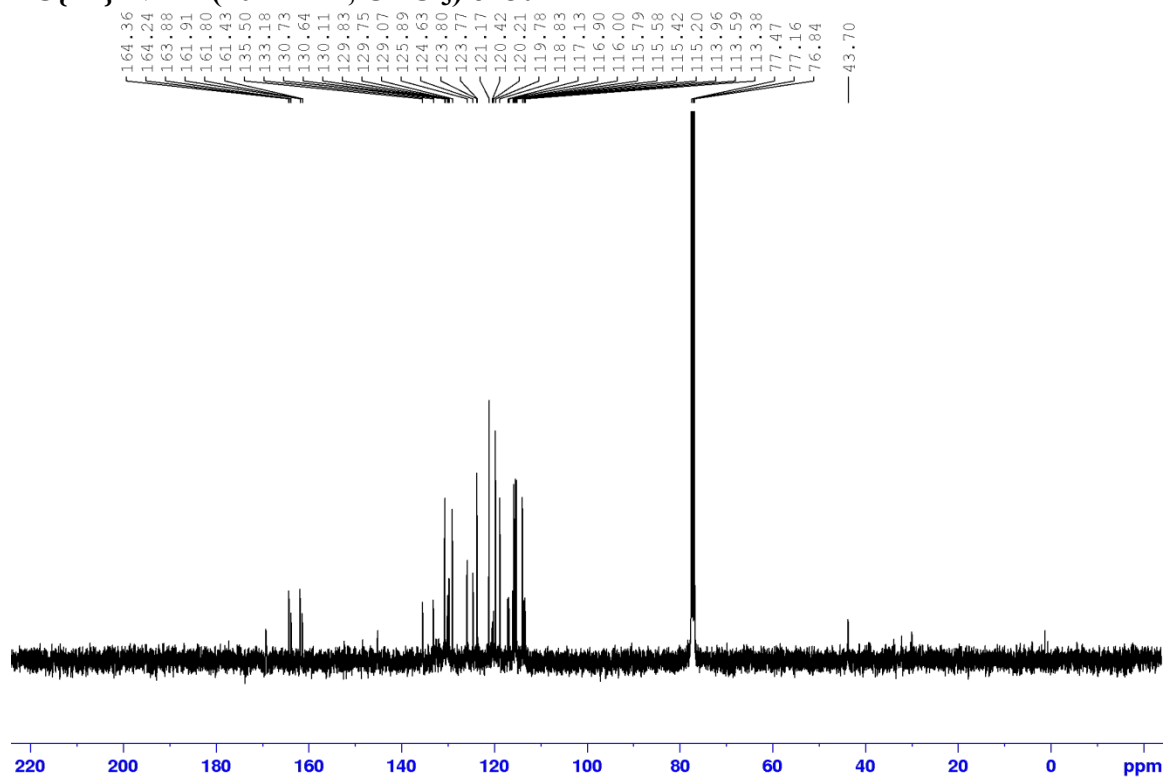

DEPT-135 (101 MHz, CDCl<sub>3</sub>) of 3u

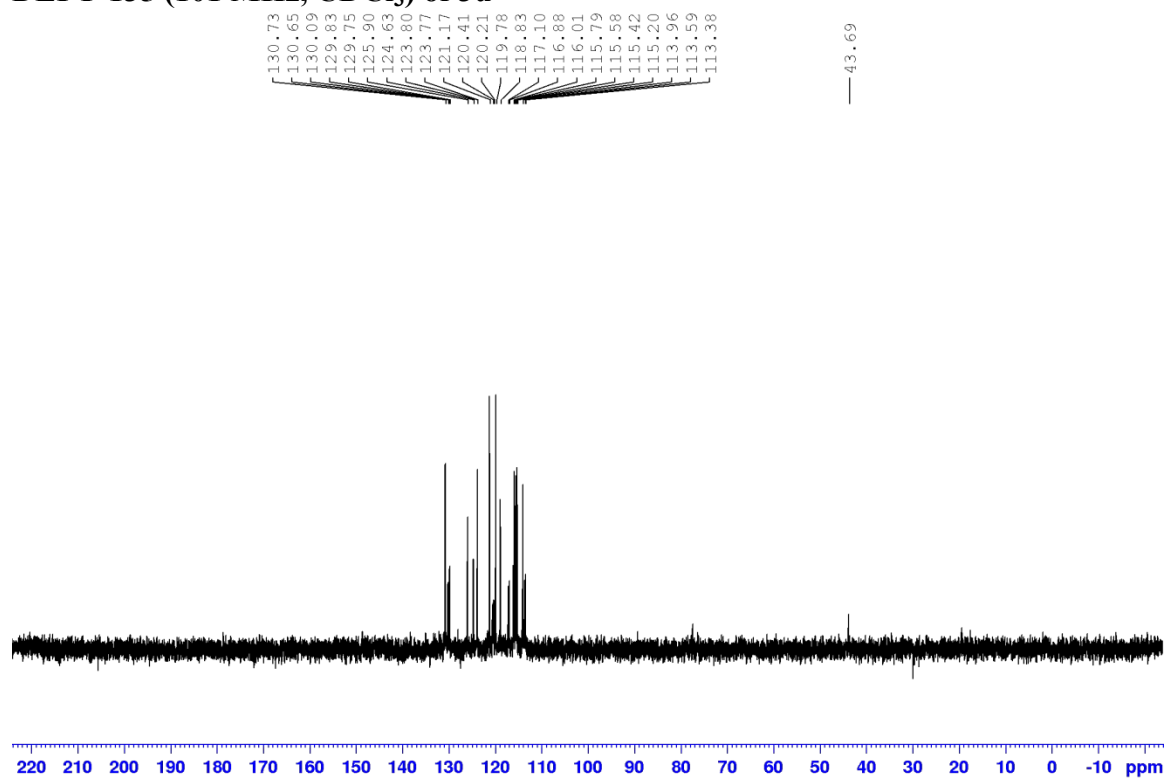

<sup>19</sup>F-NMR (377 MHz, CDCl<sub>3</sub>) of 3u

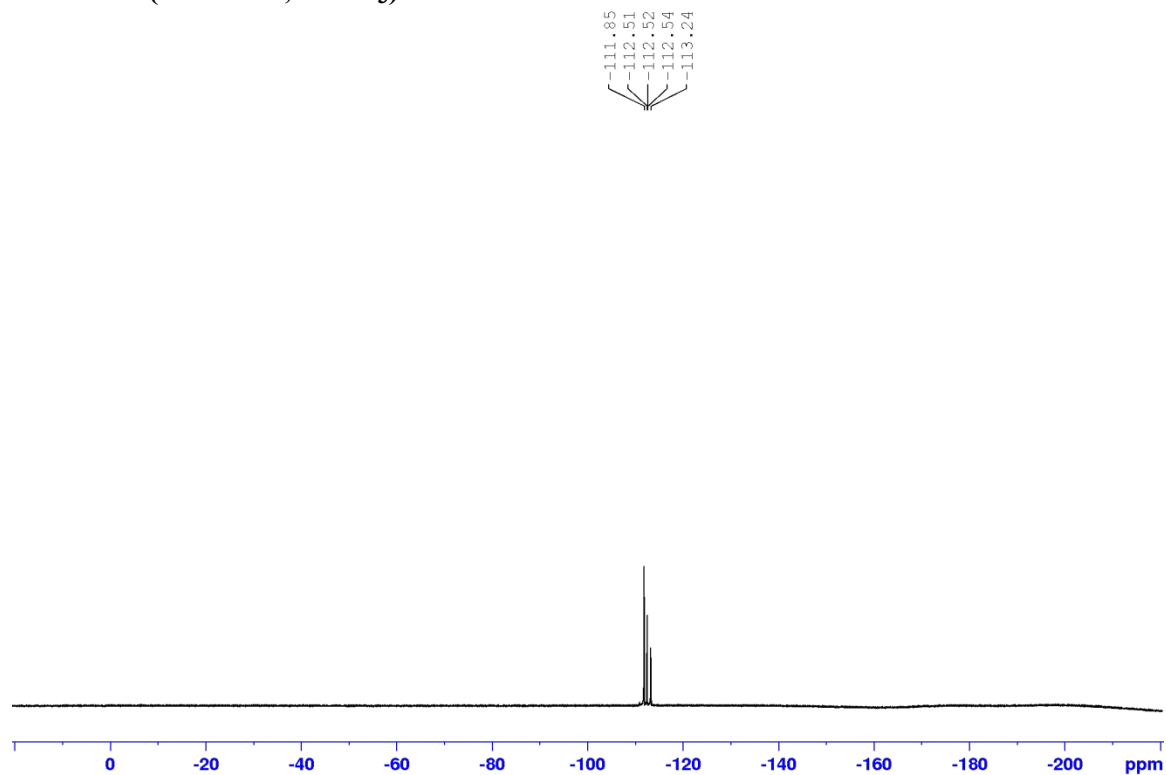

# HRMS of 3u

## Elemental Composition Report

Page 1

### Single Mass Analysis

Tolerance = 100.0 PPM / DBE: min = -1.5, max = 50.0

Element prediction: Off

Number of isotope peaks used for i-FIT = 3

Monoisotopic Mass, Even Electron Ions

32 formula(e) evaluated with 1 results within limits (up to 3 closest results for each mass)

Elements Used:

C: 0-33 H: 0-100 N: 0-4 F: 0-3

SM-422

QMI DIVISION, CSIR-IIIM JAMMU  
Xevo G2-XS QTOF YFC2015

30-Jun-2023

12:26:12

1: TOF MS ES+

7.77e+006

300623\_02.6 (0.138)

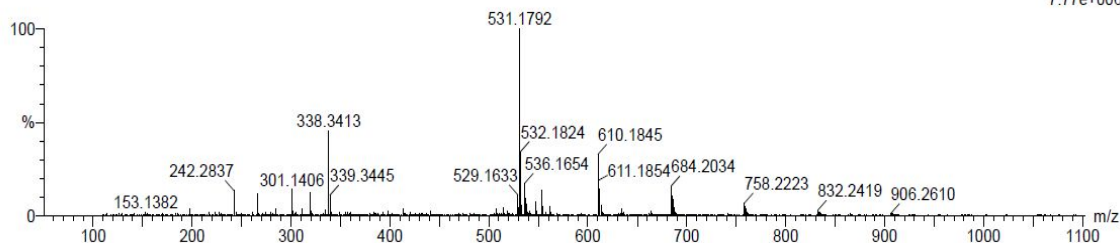

Minimum: -1.5  
Maximum: 2.0 100.0 50.0

| Mass     | Calc. Mass | mDa  | PPM  | DBE  | i-FIT | Norm | Conf(%) | Formula       |
|----------|------------|------|------|------|-------|------|---------|---------------|
| 531.1792 | 531.1797   | -0.5 | -0.9 | 23.5 | 945.7 | n/a  | n/a     | C33 H22 N4 F3 |

## <sup>1</sup>H-NMR (400 MHz, CDCl<sub>3</sub>) of 3v

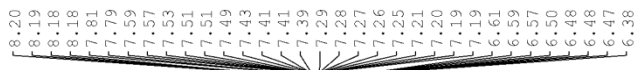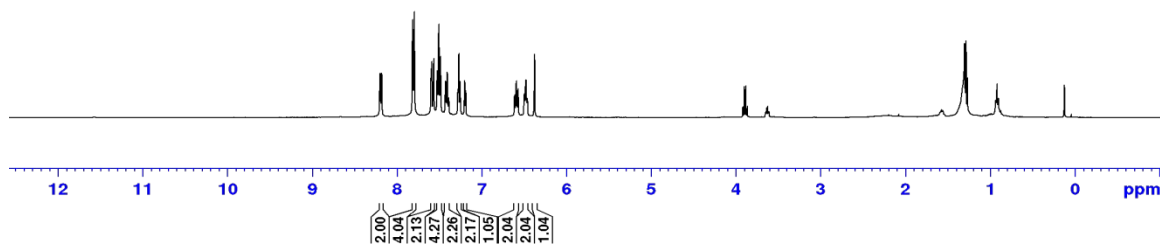

**$^{13}\text{C}\{^1\text{H}\}$ -NMR (101 MHz,  $\text{CDCl}_3$ ) of **3v****

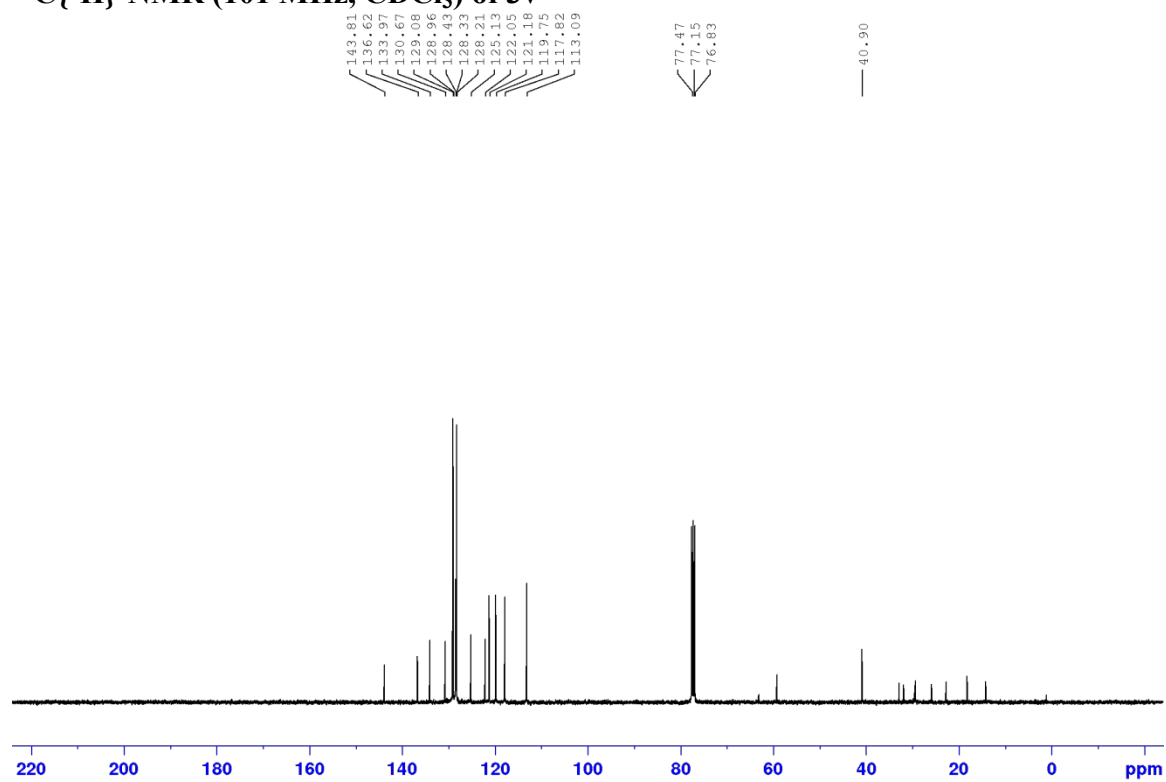

**DEPT-135 (101 MHz,  $\text{CDCl}_3$ ) of **3v****

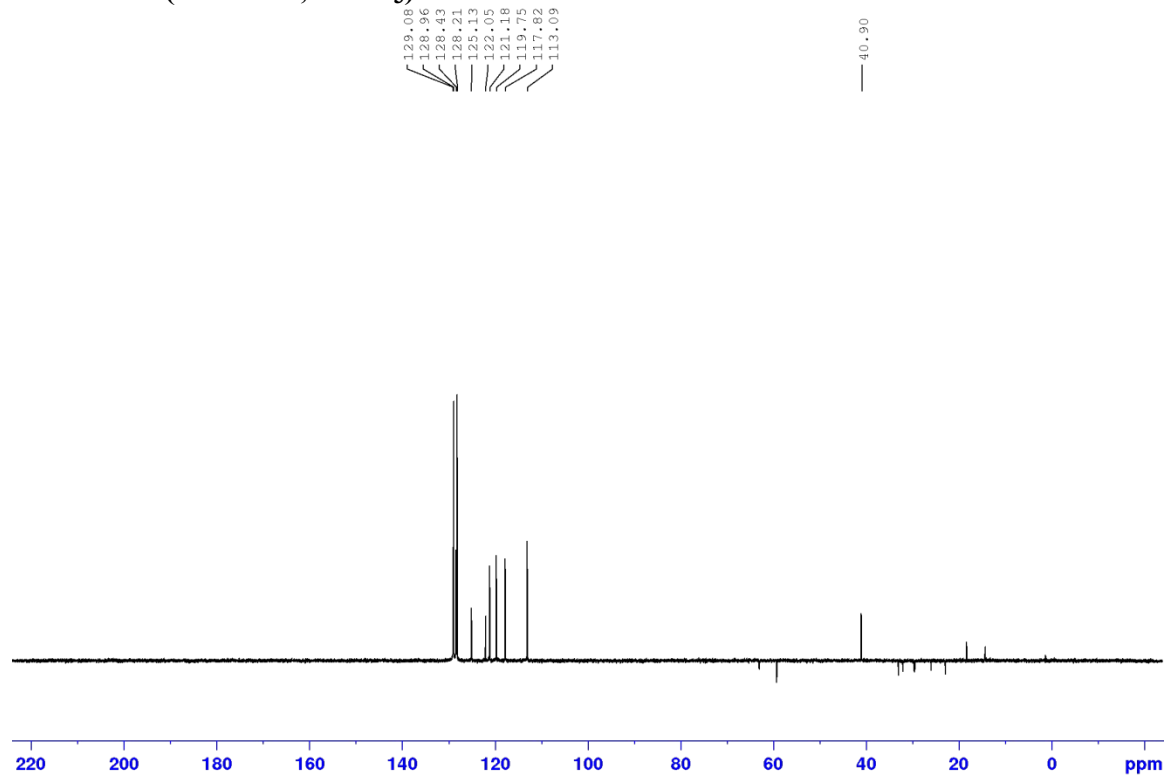

# HRMS of 3v

## Final Composition Report

Page 1

### Single Mass Analysis

Tolerance = 10.0 PPM / DBE: min = -1.5, max = 50.0  
 Element prediction: Off  
 Number of isotope peaks used for i-FIT = 3

Monoisotopic Mass, Even Electron Ions  
 17 formula(e) evaluated with 1 results within limits (up to 3 closest results for each mass)

Elements Used:  
 C: 0-31 H: 0-200 N: 0-4 S: 0-1

SM-325

QMI DIVISION, CSIR-IIIM JAMMU  
 Xevo G2-XS QTOF YFC2015

23-Nov-2021  
 12:23:40  
 1: TOF MS ES+  
 1.09e+006

231121\_18 15 (0.310) Cm (15)

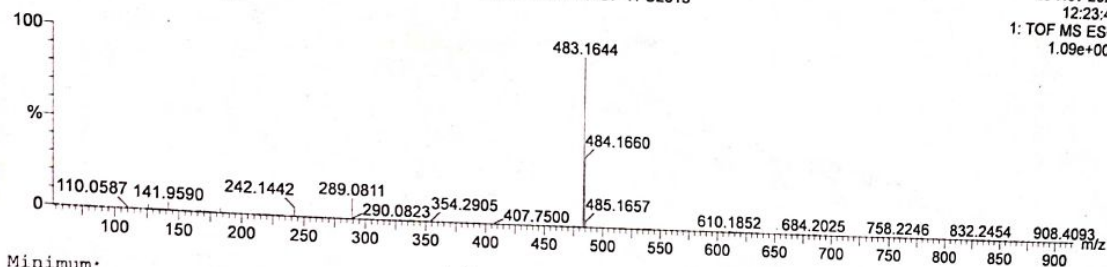

Minimum:

Maximum: 2.0 10.0 -1.5

| Mass     | Calc. Mass | mDa | PPM | DBE  | i-FIT | Norm | Conf(%) | Formula      |
|----------|------------|-----|-----|------|-------|------|---------|--------------|
| 483.1644 | 483.1643   | 0.1 | 0.2 | 22.5 | 34.2  | n/a  | n/a     | C31 H23 N4 S |

## <sup>1</sup>H-NMR (400 MHz, CDCl<sub>3</sub>) of 3w

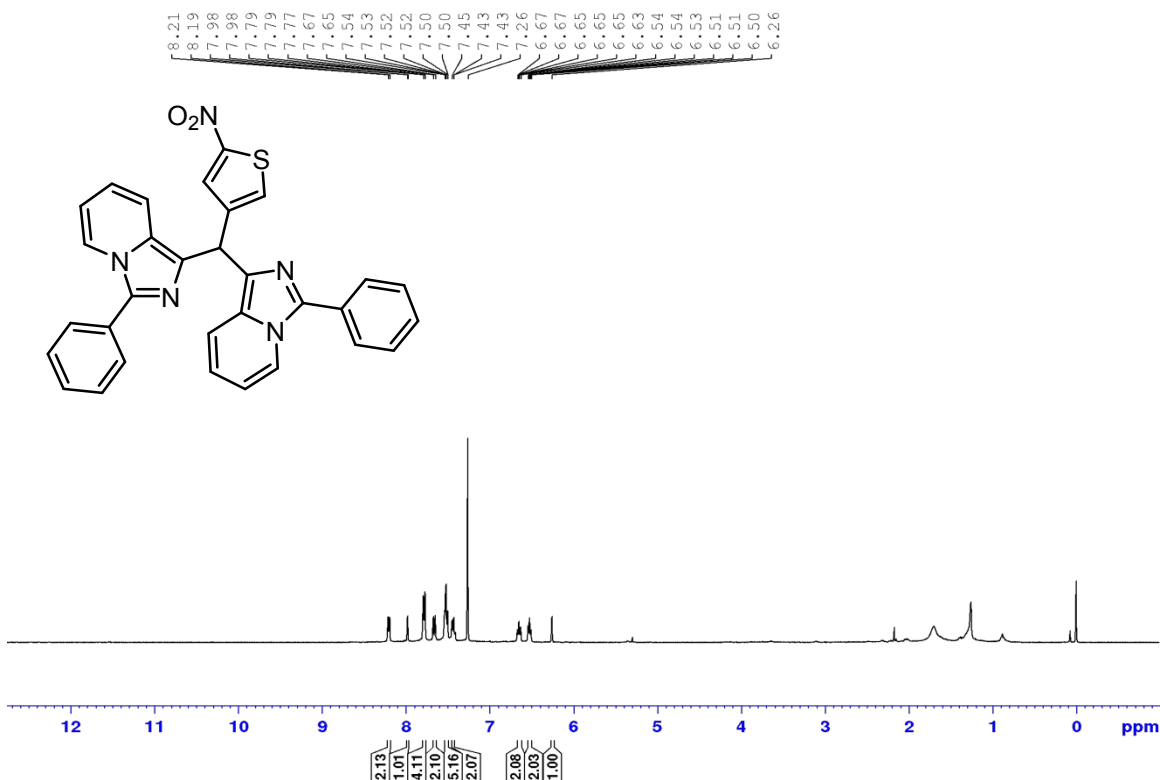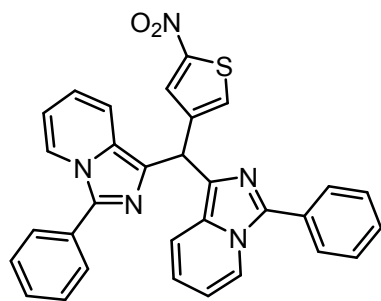



**$^{13}\text{C}\{^1\text{H}\}$ -NMR (101 MHz,  $\text{CDCl}_3$ ) of 3w**

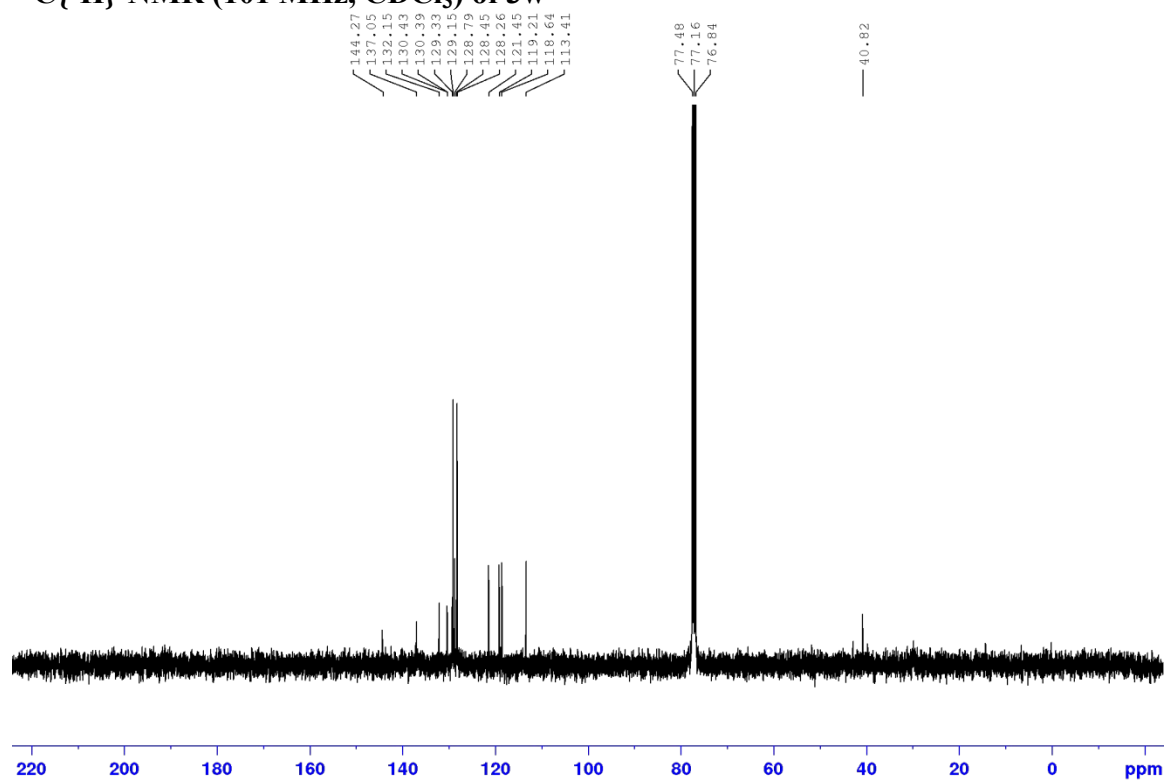

**DEPT-135 (101 MHz,  $\text{CDCl}_3$ ) of 3w**

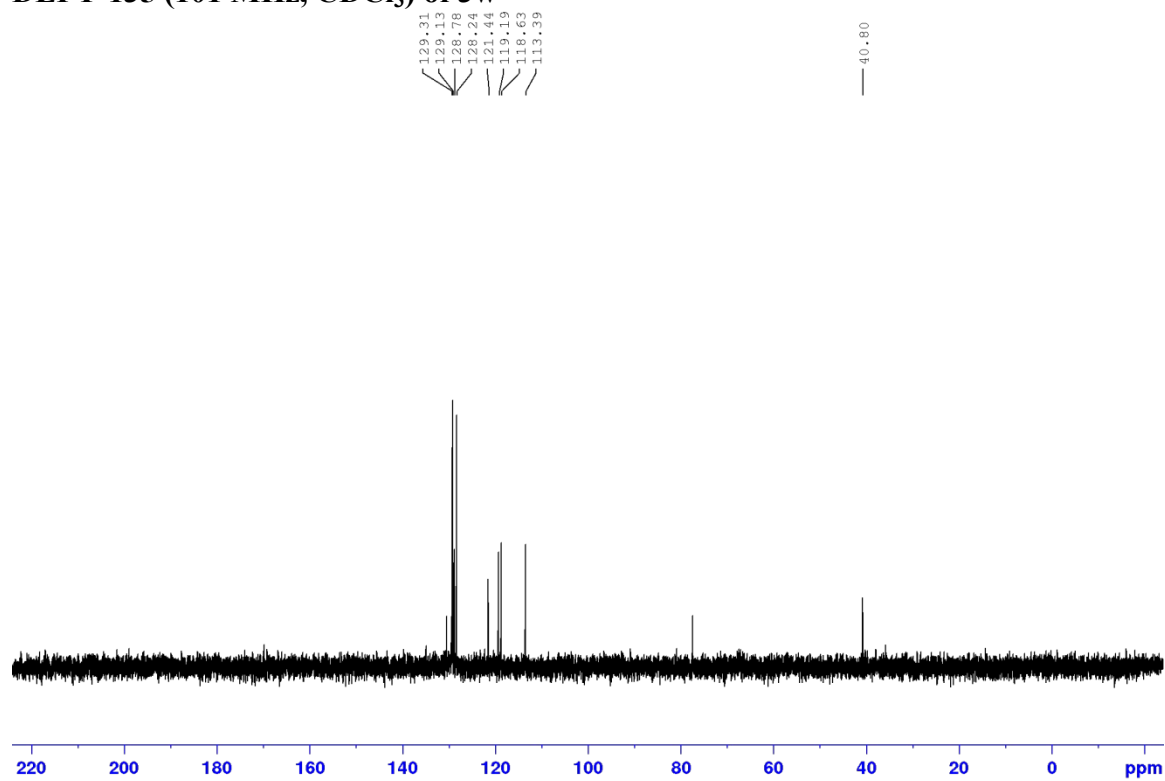

# HRMS of 3w

## Elemental Composition Report

Page 1

### Single Mass Analysis

Tolerance = 3.0 PPM / DBE: min = -1.5, max = 50.0

Element prediction: Off

Number of isotope peaks used for i-FIT = 3

Monoisotopic Mass, Even Electron Ions

227 formula(e) evaluated with 1 results within limits (up to 3 closest results for each mass)

Elements Used:

C: 0-31 H: 0-200 N: 0-5 O: 0-2 S: 0-1 I: 0-1

SM-329

QMI DIVISION, CSIR-IIIM JAMMU  
Xevo G2-XS QTOF YFC2015

08-Dec-2021  
12:47:21  
1: TOF MS ES+  
1.90e+006

081221\_08 13 (0.276) Cm (13:14)

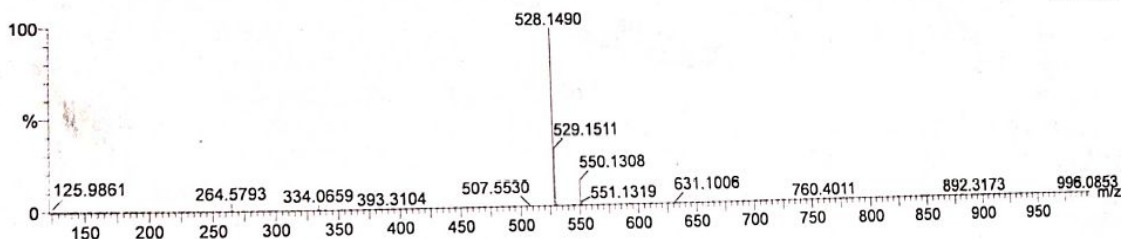

Minimum: -1.5  
Maximum: 50.0

| Mass     | Calc. Mass | mDa  | PPM  | DBE  | i-FIT | Norm | Conf(%) | Formula         |
|----------|------------|------|------|------|-------|------|---------|-----------------|
| 528.1490 | 528.1494   | -0.4 | -0.8 | 23.5 | 36.4  | n/a  | n/a     | C31 H22 N5 O2 S |

## <sup>1</sup>H-NMR (400 MHz, CDCl<sub>3</sub>) of 3x

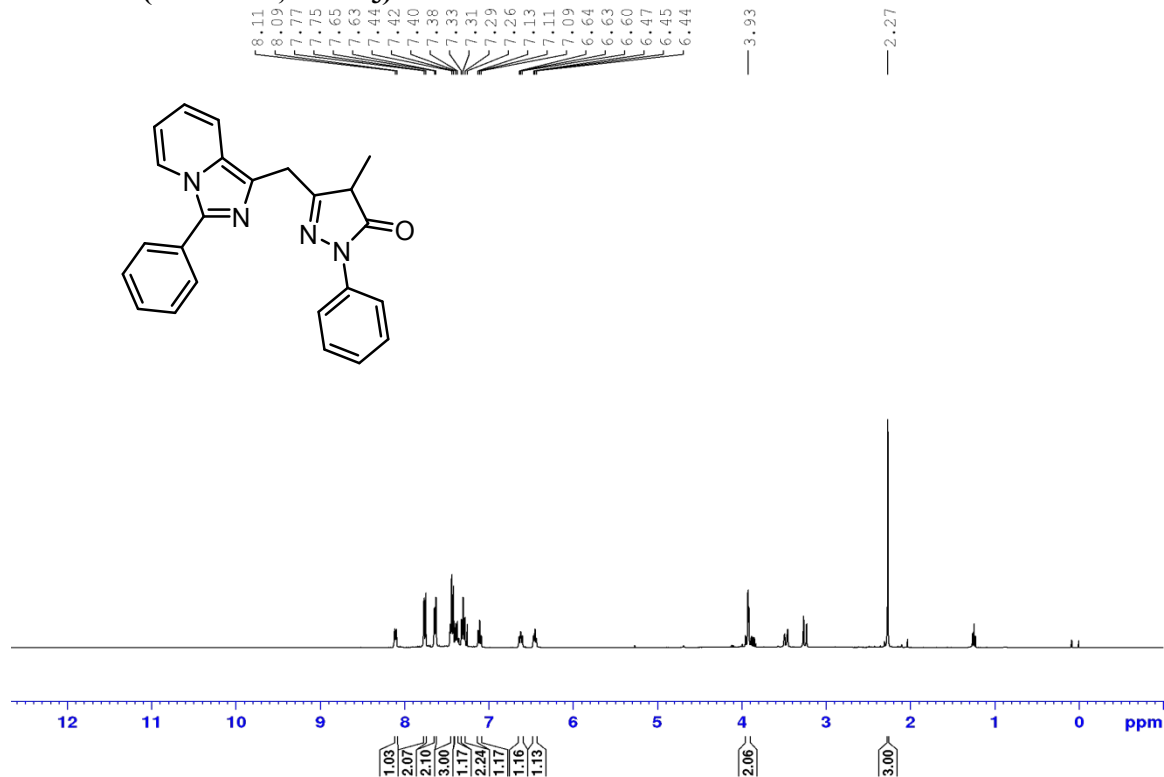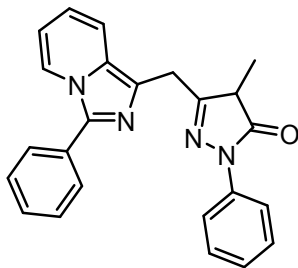

**$^{13}\text{C}\{^1\text{H}\}$ -NMR (101 MHz,  $\text{CDCl}_3$ ) of 3x**

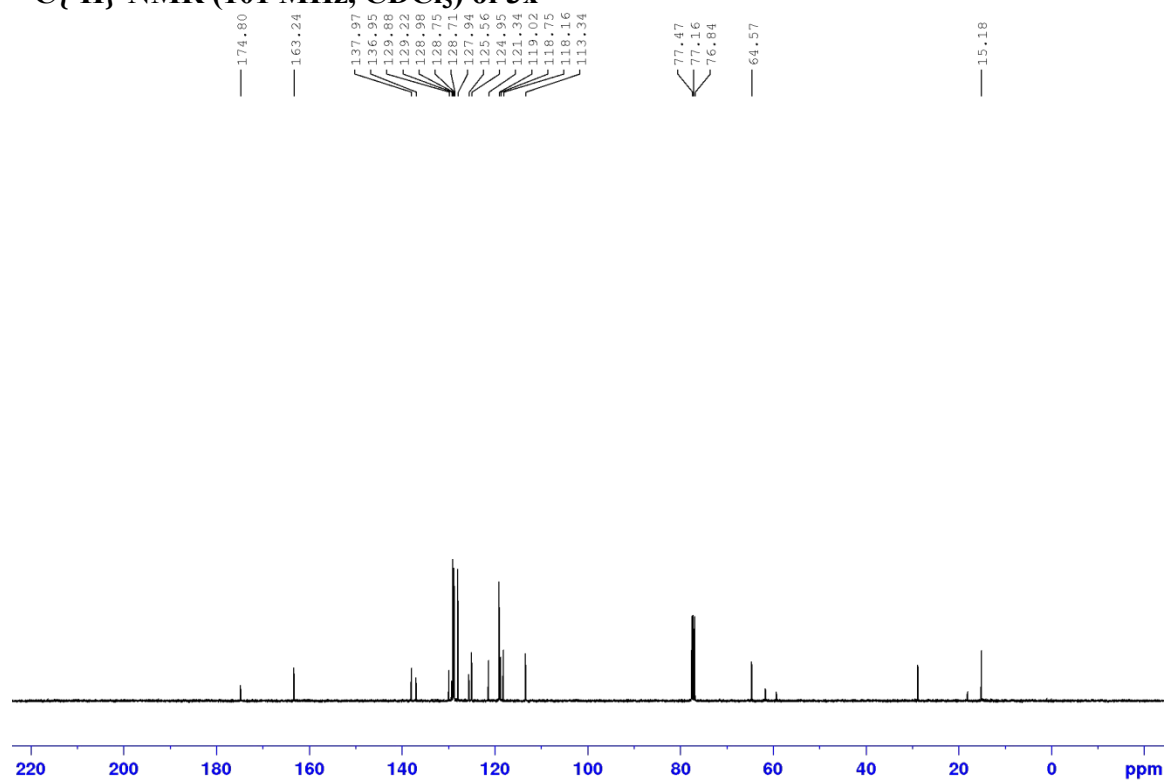

**DEPT-135 (101 MHz,  $\text{CDCl}_3$ ) of 3x**

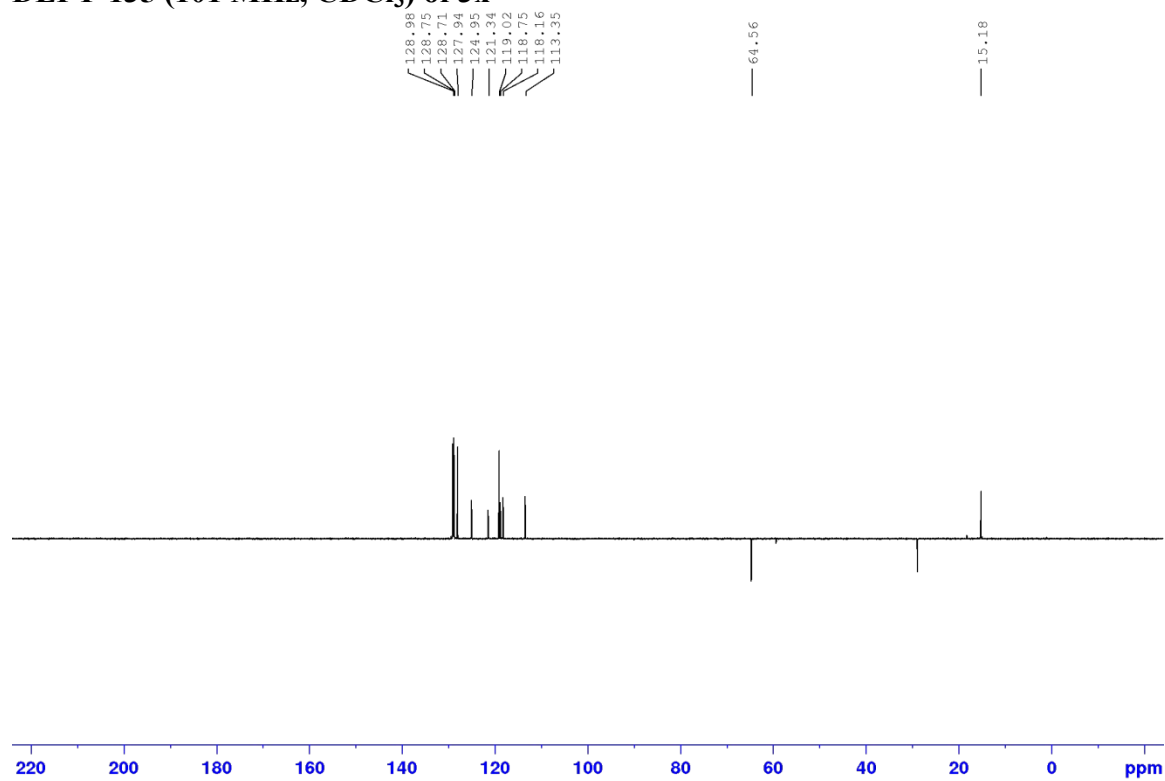

# HRMS of 3x

## Elemental Composition Report

Page 1

### Single Mass Analysis

Tolerance = 5.0 PPM / DBE: min = -1.5, max = 50.0

Element prediction: Off

Number of isotope peaks used for i-FIT = 3

Monoisotopic Mass, Even Electron Ions

127 formula(e) evaluated with 1 results within limits (up to 3 closest results for each mass)

Elements Used:

C: 0-24 H: 0-200 N: 0-4 O: 0-1 S: 0-1 Br: 0-1

SM-330

010222\_28 20 (0.414) Cm (20:21)

QMI DIVISION, CSIR-IIIM JAMMU  
Xevo G2-XS QTOF YFC2015

01-Feb-2022  
13:09:28  
1: TOF MS ES+  
1.28e+006

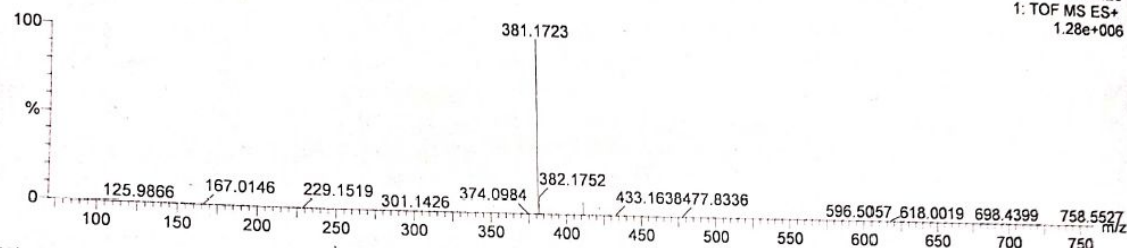

Minimum:

Maximum: 2.0 5.0 -1.5 50.0

| Mass     | Calc. Mass | mDa | PPM | DBE  | i-FIT | Norm | Conf (%) | Formula                                          |
|----------|------------|-----|-----|------|-------|------|----------|--------------------------------------------------|
| 381.1723 | 381.1715   | 0.8 | 2.1 | 16.5 | 34.6  | n/a  | n/a      | C <sub>24</sub> H <sub>21</sub> N <sub>4</sub> O |

## <sup>1</sup>H-NMR (400 MHz, CDCl<sub>3</sub>) of 3y

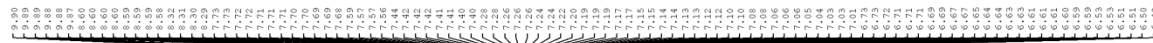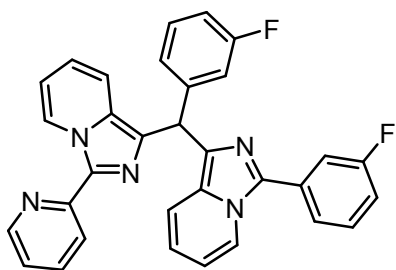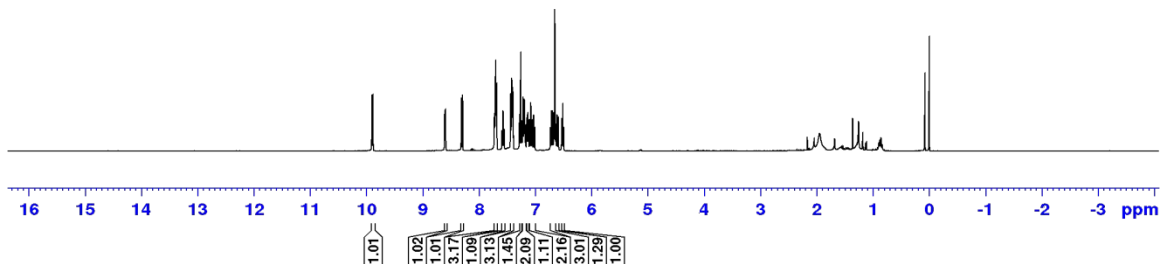

**$^{13}\text{C}\{^1\text{H}\}$ -NMR (101 MHz,  $\text{CDCl}_3$ ) of 3y**

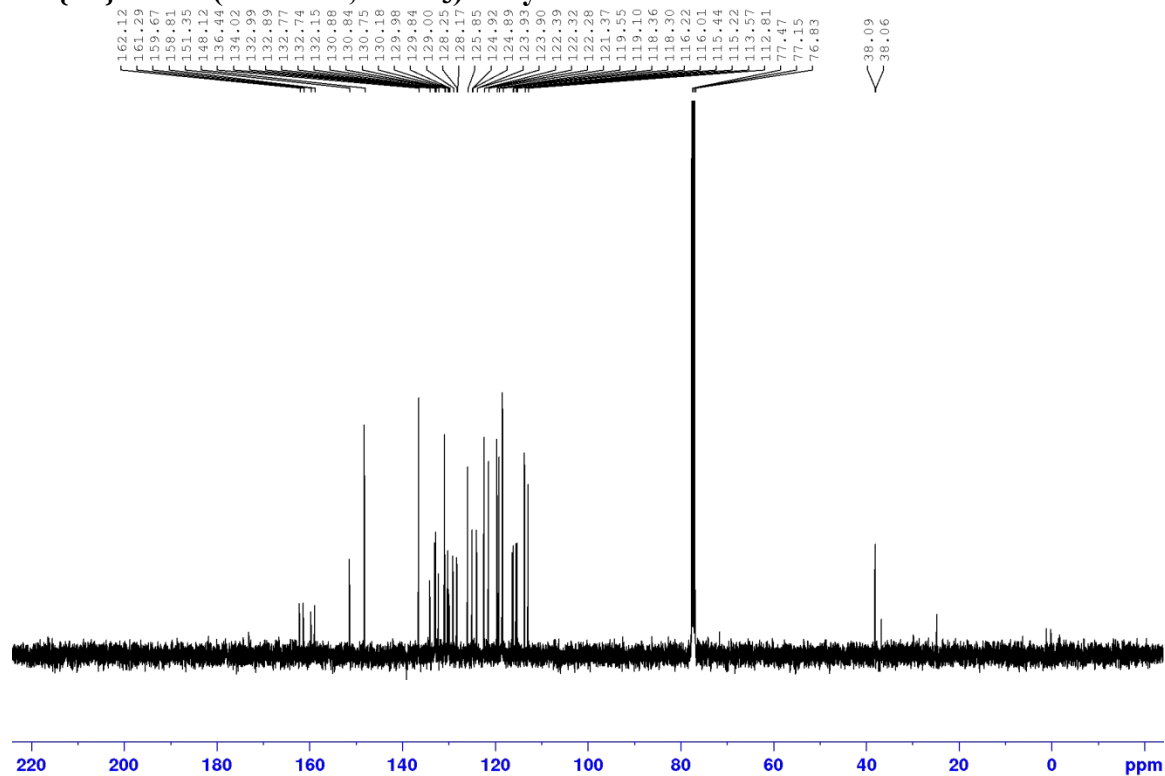

**DEPT-135 (101 MHz,  $\text{CDCl}_3$ ) of 3y**

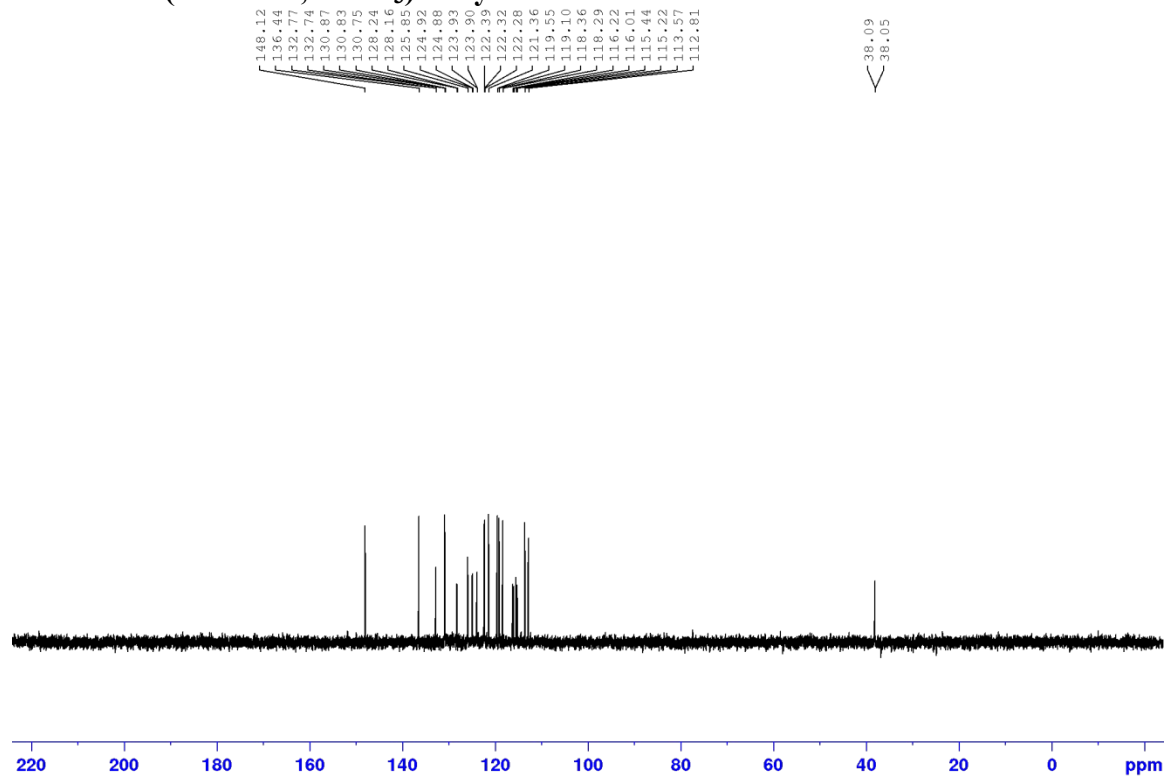

<sup>19</sup>F-NMR (377 MHz, CDCl<sub>3</sub>) of 3y

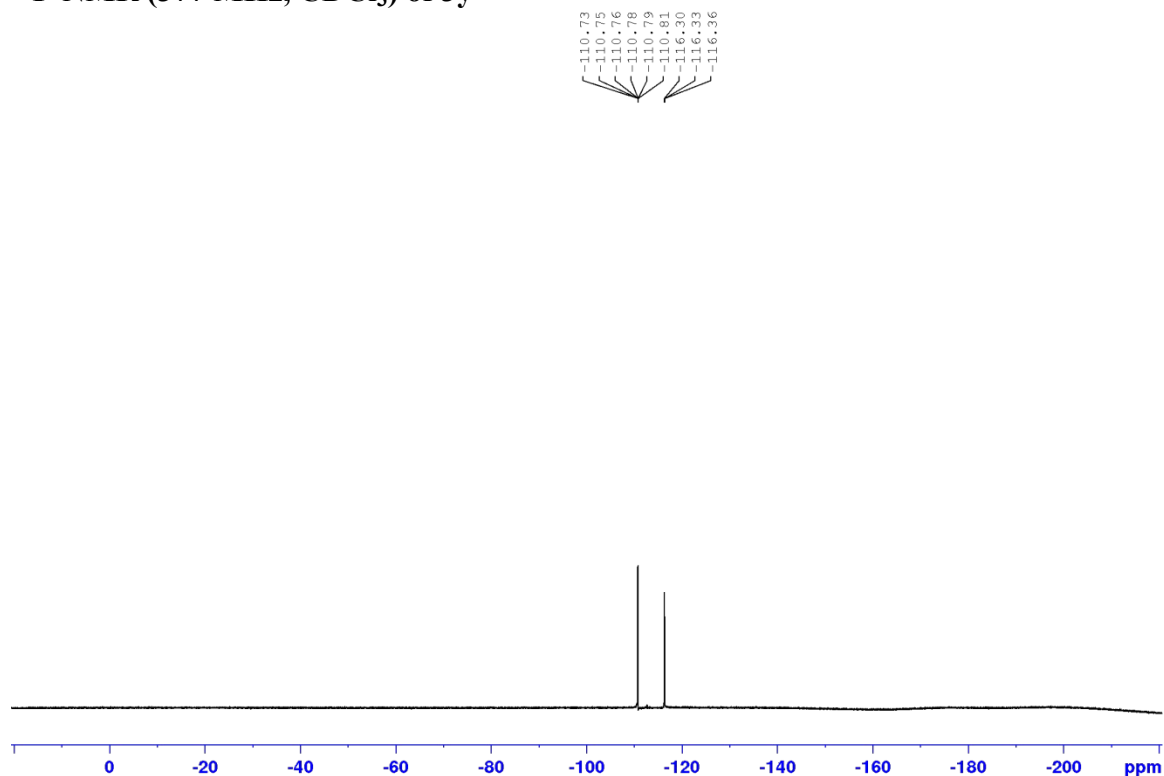

HRMS of 3y

Elemental Composition Report

Page 1

Single Mass Analysis

Tolerance = 50.0 PPM / DBE: min = -1.5, max = 50.0

Element prediction: Off

Number of isotope peaks used for i-FIT = 3

Monoisotopic Mass, Even Electron Ions

30 formula(e) evaluated with 1 results within limits (up to 3 closest results for each mass)

Elements Used:

C: 0-32 H: 0-100 N: 0-5 F: 0-2

SM-372 (A)

QMI DIVISION, CSIR-IIIM JAMMU  
Xevo G2-XS QTOF YFC2015

13-Sep-2022

12:34:09

1: TOF MS ES+

6.93e+006

130922\_09 18 (0.380)

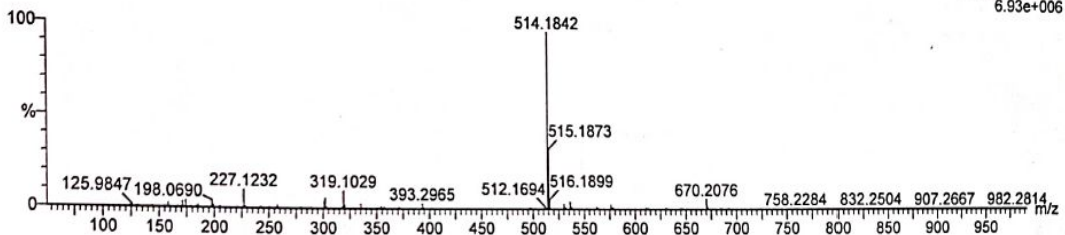

Minimum: -1.5  
Maximum: 2.0 50.0 50.0

| Mass     | Calc. Mass | mDa  | PPM  | DBE  | i-FIT | Norm | Conf (%) | Formula       |
|----------|------------|------|------|------|-------|------|----------|---------------|
| 514.1842 | 514.1843   | -0.1 | -0.2 | 23.5 | 660.1 | n/a  | n/a      | C32 H22 N5 F2 |

**$^1\text{H-NMR}$  (400 MHz,  $\text{CDCl}_3$ ) of **3z****

8.18  
8.16  
7.80  
7.78  
7.55  
7.53  
7.51  
7.49  
7.43  
7.41  
7.26  
6.61  
6.59  
6.58  
6.57  
6.49  
6.49  
6.47  
6.46  
6.46

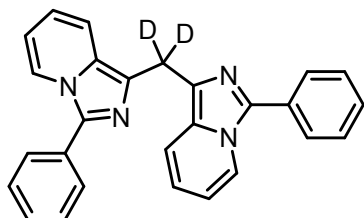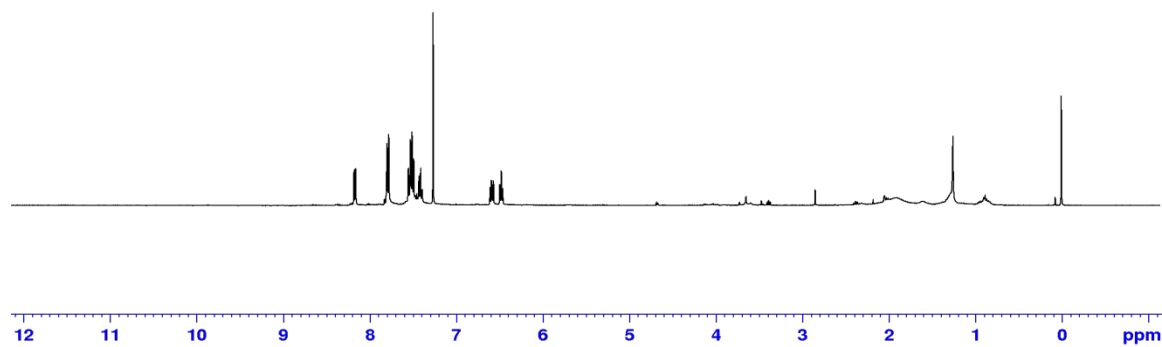

**$^{13}\text{C}\{^1\text{H}\}$ -NMR (101 MHz,  $\text{CDCl}_3$ ) of **3z****

137.46  
137.20  
136.96  
131.54  
129.61  
129.47  
129.45  
129.32  
128.89  
128.86  
128.76  
128.60  
128.35  
127.90  
121.20  
121.07  
119.20  
118.92  
118.07  
117.95  
113.44  
113.38  
77.48  
77.16  
76.84

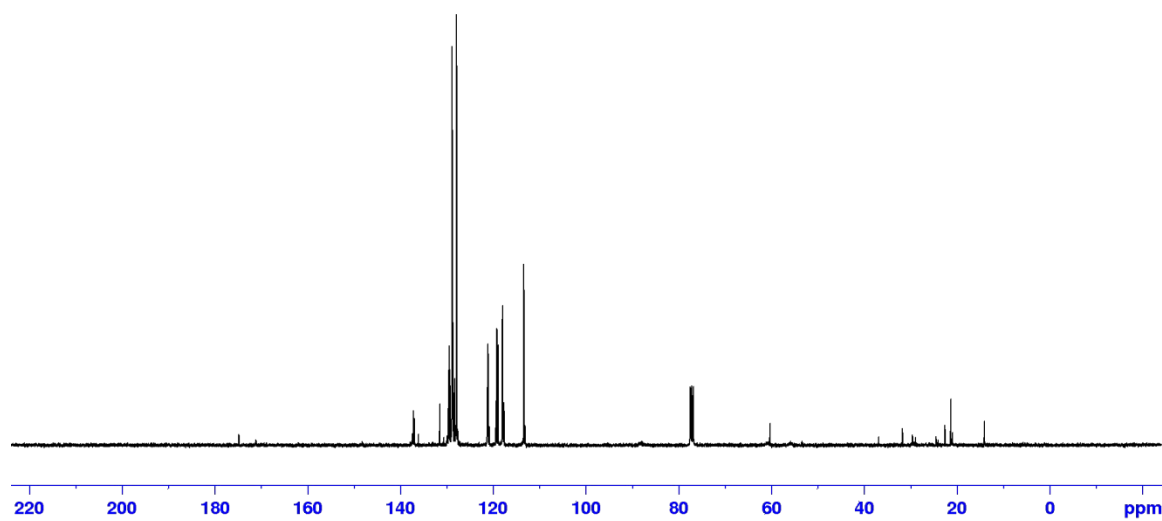

### DEPT-135 (101 MHz, CDCl<sub>3</sub>) of 3z

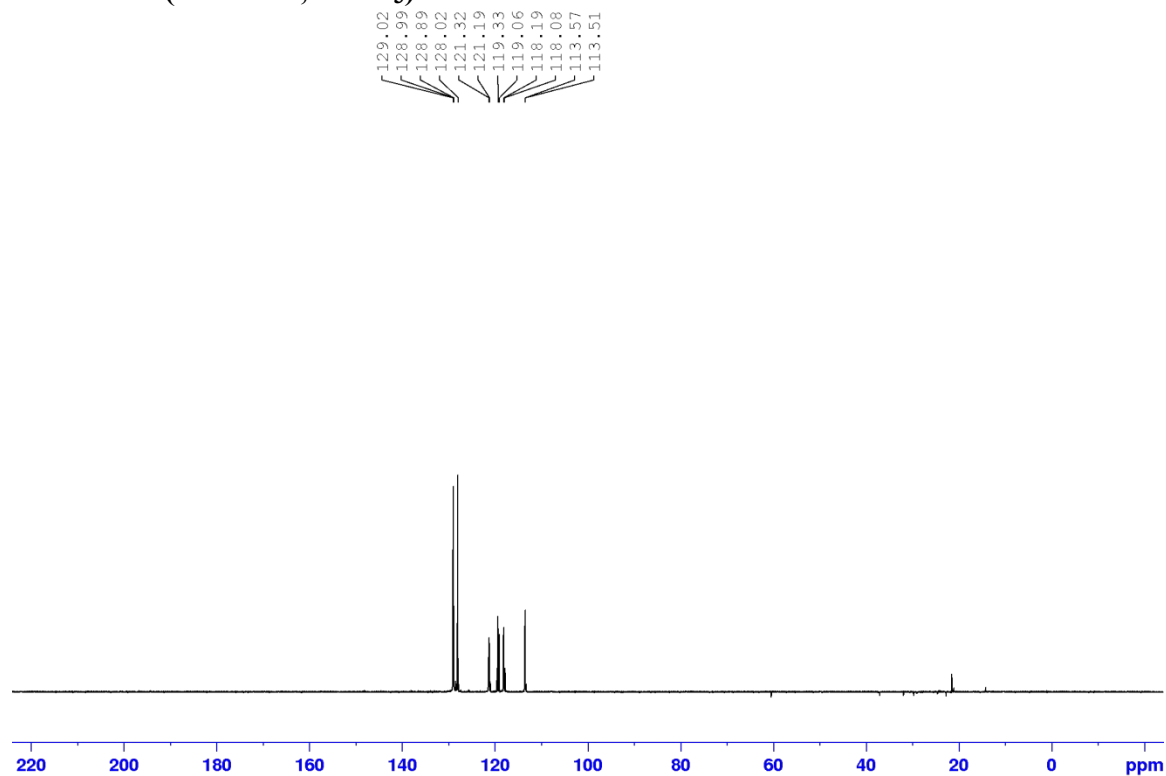

### HRMS of 3z

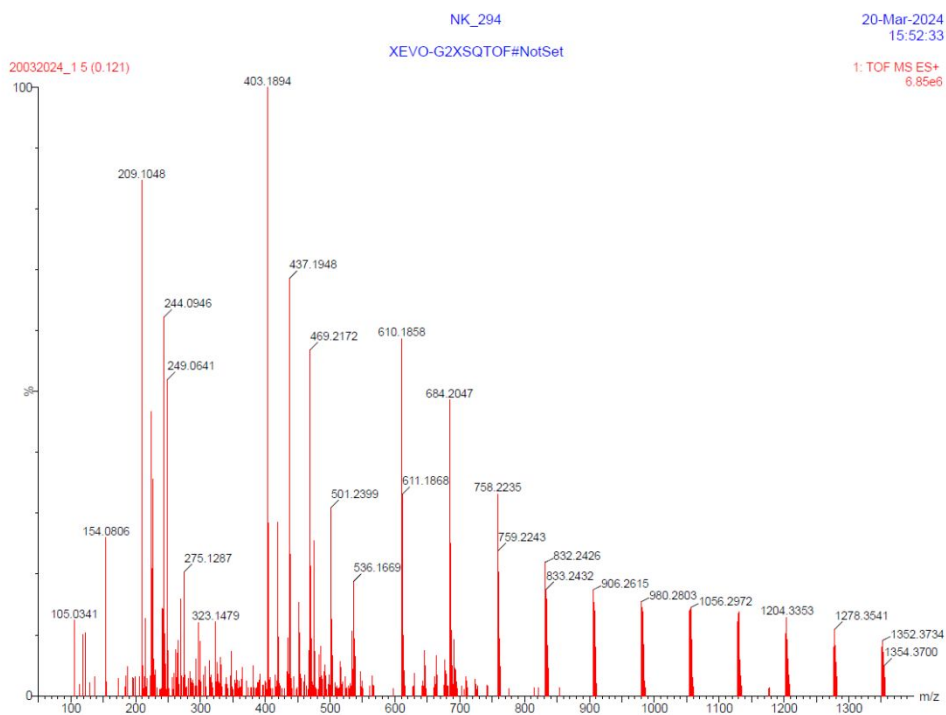



MS Spectrum

BG Mode: Averaged 1.692-1.962(101-117)\$EndIf\$ Segment 1 - Event 1

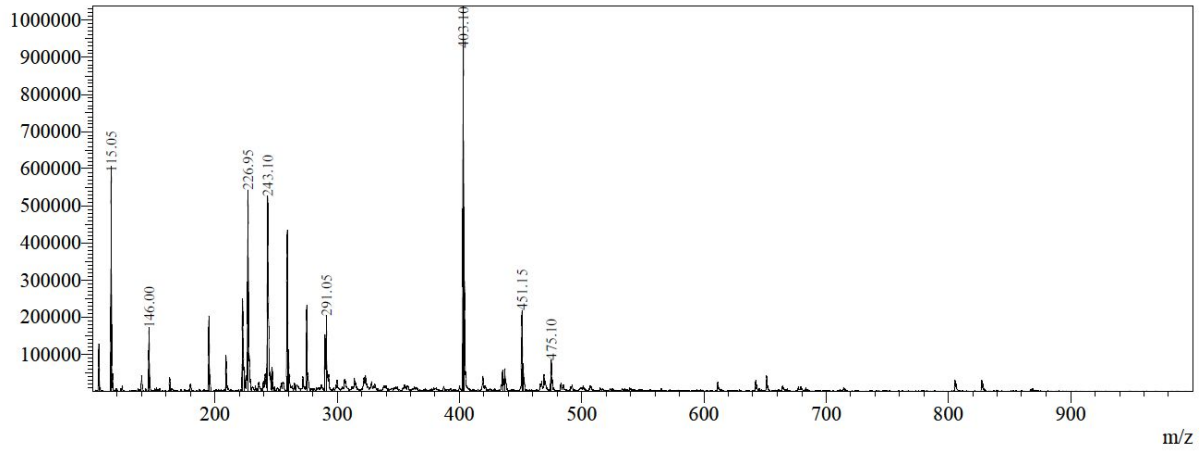

<sup>1</sup>H-NMR (400 MHz, CDCl<sub>3</sub>) of 5a

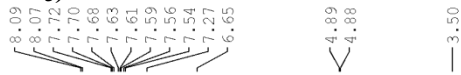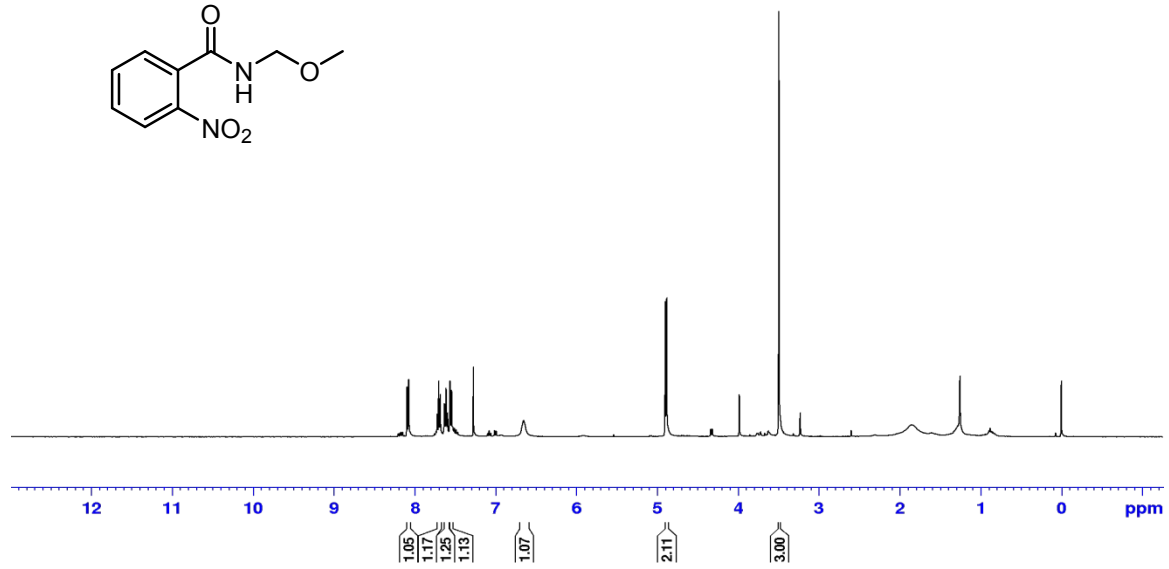

**$^{13}\text{C}\{^1\text{H}\}$ -NMR (101 MHz,  $\text{CDCl}_3$ ) of 5a**

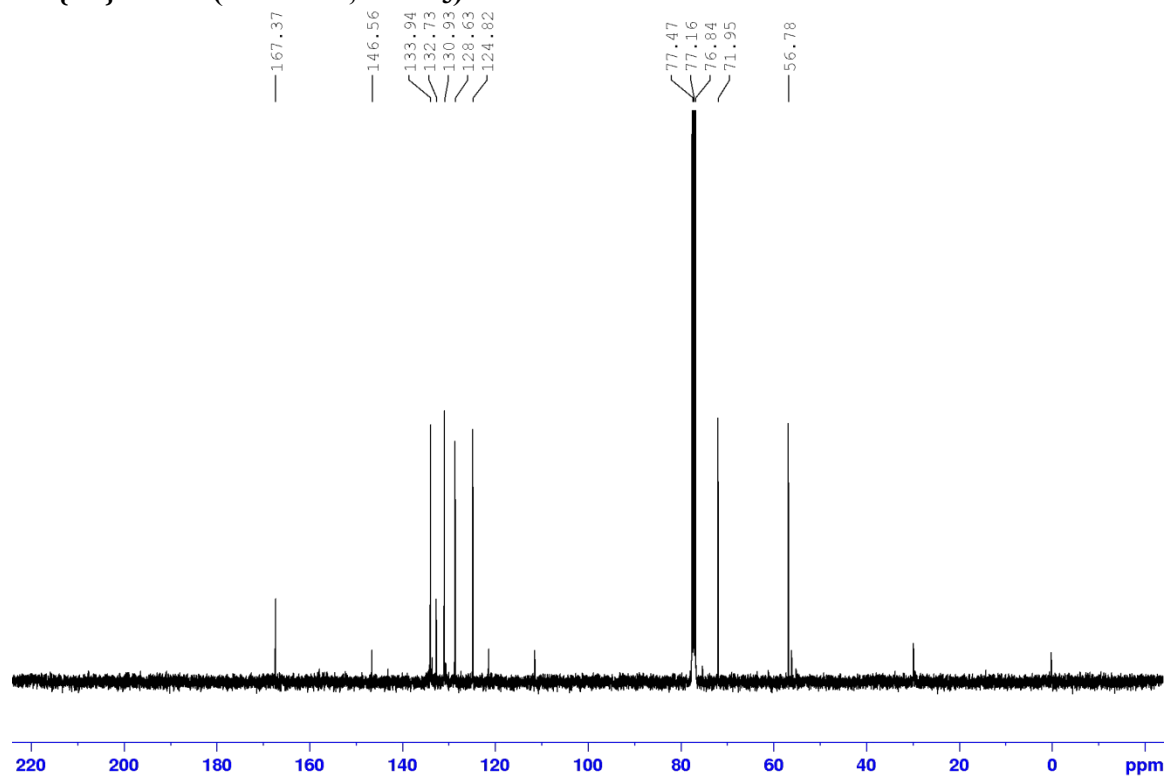

**DEPT-135 (101 MHz,  $\text{CDCl}_3$ ) of 5a**

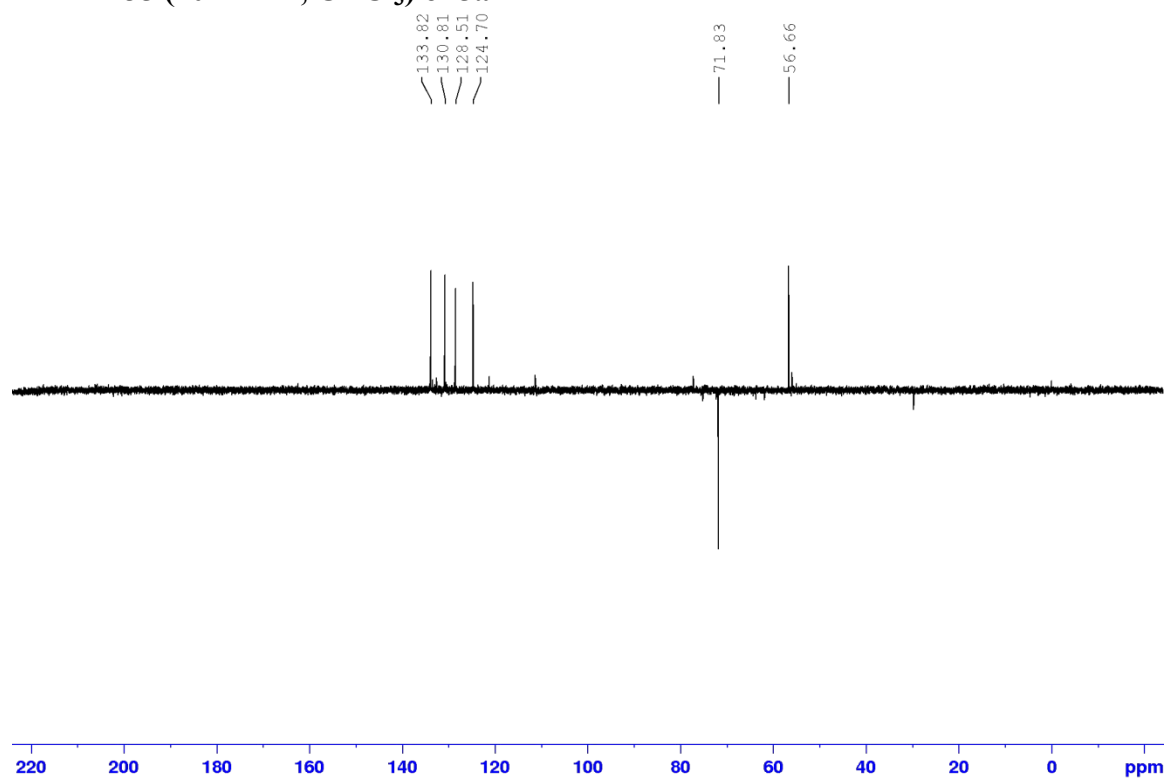

# HRMS of 5a

## Elemental Composition Report

### Single Mass Analysis

Tolerance = 50.0 PPM / DBE: min = -1.5, max = 50.0

Element prediction: Off

Number of isotope peaks used for i-FIT = 3

Monoisotopic Mass, Even Electron Ions

31 formula(e) evaluated with 1 results within limits (up to 3 closest results for each mass)

Elements Used:

C: 0-9 H: 0-100 N: 0-2 O: 0-4 Na: 0-1

SM-NITRO Desired

QMI DIVISION, CSIR-IIIM JAMMU  
Xevo G2-XS QTOF YFC2015

26-Dec-2023

14:24:55

1: TOF MS ES+

6.12e+006

261223\_04 5 (0.121)

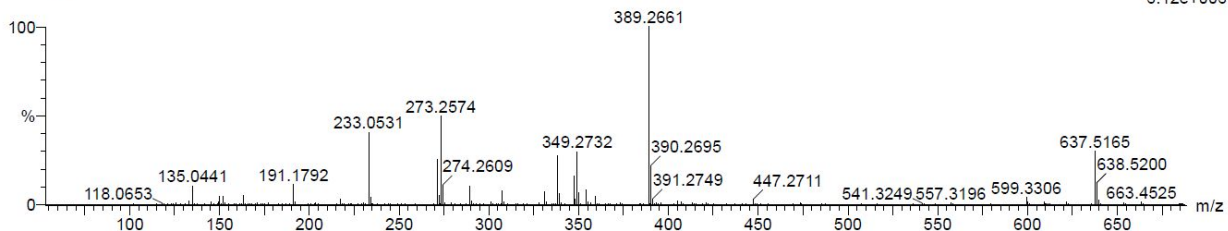

Minimum: -1.5  
Maximum: 2.0 50.0 50.0

| Mass     | Calc. Mass | mDa  | PPM  | DBE | i-FIT  | Norm | Conf (%) | Formula         |
|----------|------------|------|------|-----|--------|------|----------|-----------------|
| 233.0531 | 233.0538   | -0.7 | -3.0 | 5.5 | 1284.3 | n/a  | n/a      | C9 H10 N2 O4 Na |

## <sup>1</sup>H-NMR (400 MHz, CDCl<sub>3</sub> and DMSO-d<sub>6</sub>) of 5b

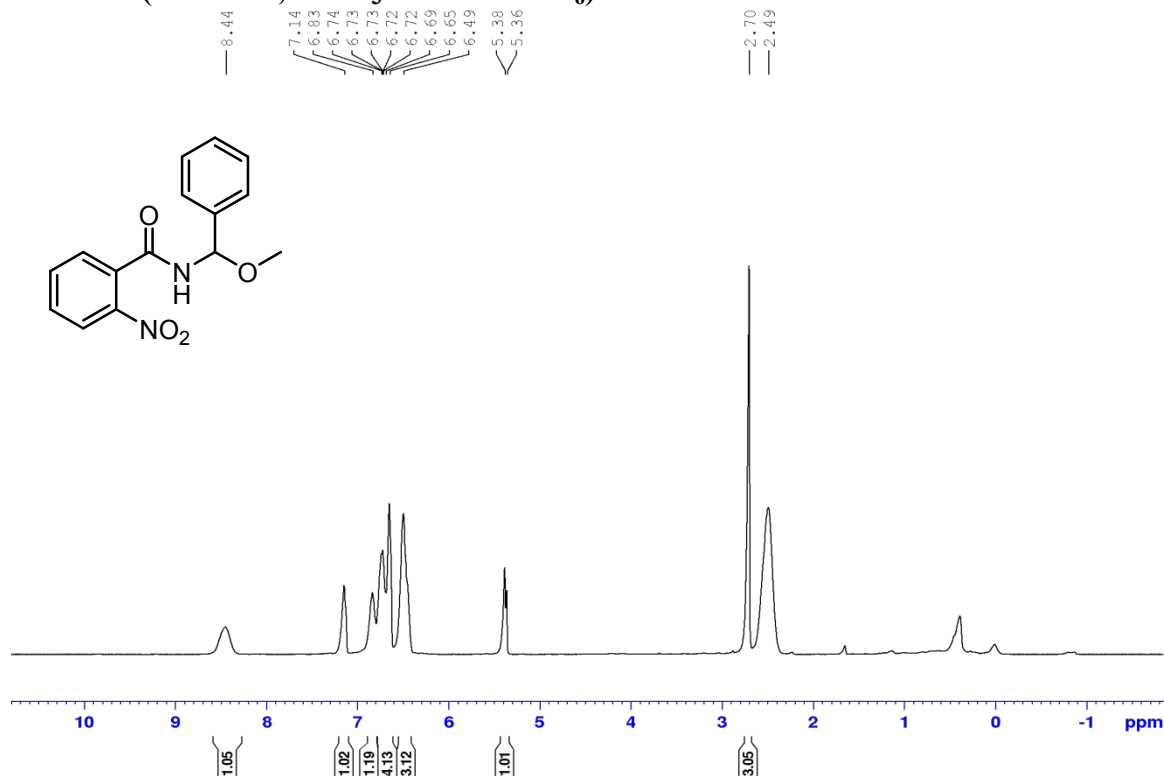

**$^{13}\text{C}\{^1\text{H}\}$ -NMR (101 MHz,  $\text{CDCl}_3$  and  $\text{DMSO-d}_6$ ) of 5b**

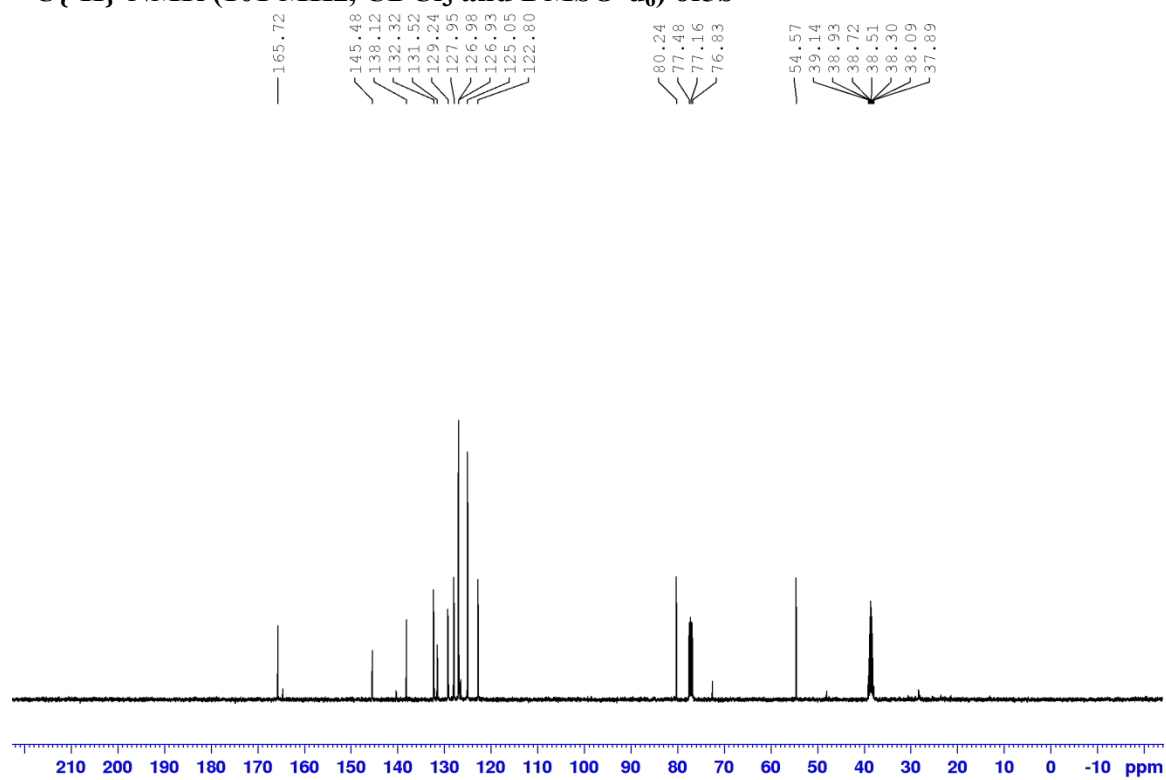

**DEPT-135 (101 MHz,  $\text{CDCl}_3$  and  $\text{DMSO-d}_6$ ) of 5b**

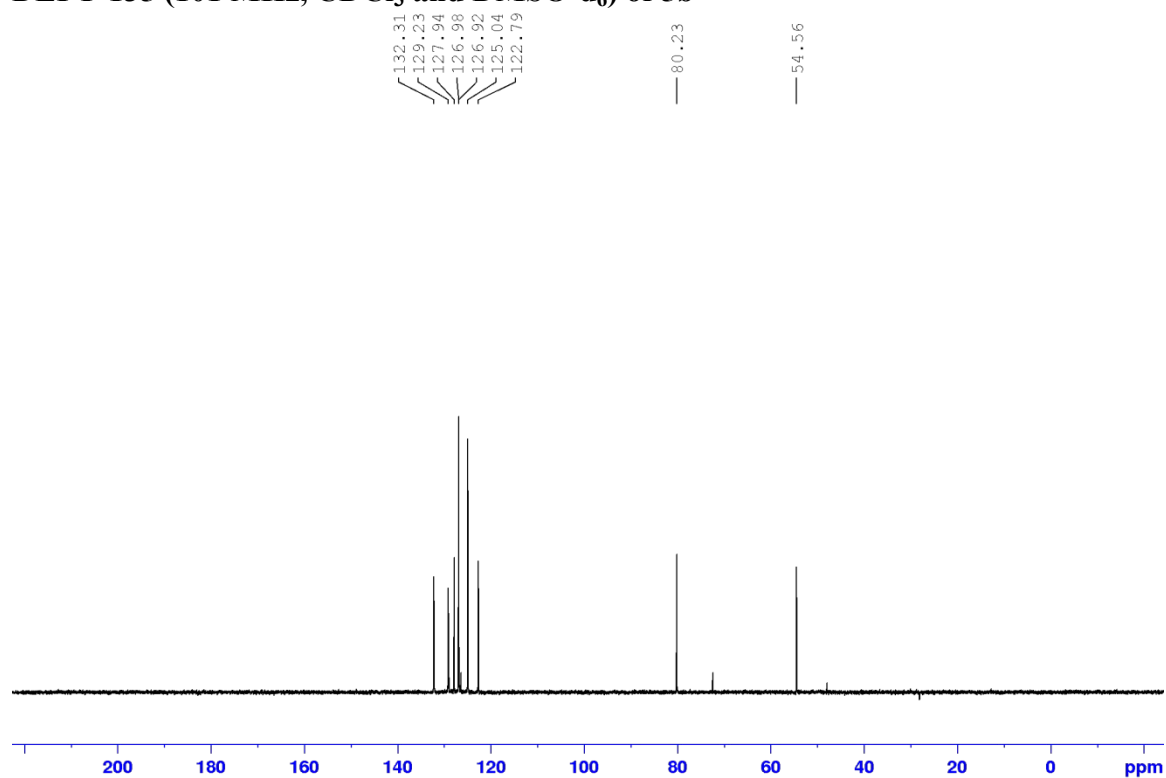

# HRMS of 5b

## Elemental Composition Report

Page 1

### Single Mass Analysis

Tolerance = 100.0 PPM / DBE: min = -1.5, max = 50.0

Element prediction: Off

Number of isotope peaks used for i-FIT = 3

Monoisotopic Mass, Even Electron Ions

33 formula(e) evaluated with 1 results within limits (up to 3 closest results for each mass)

Elements Used:

C: 0-15 H: 0-100 N: 0-2 O: 0-4 Na: 0-1

SM-NITRO PH

QMI DIVISION, CSIR-IIIM JAMMU  
Xevo G2-XS QTOF YFC2015

06-Oct-2023

14:32:57

1: TOF MS ES+

1.38e+007

061023\_26 6 (0.138)

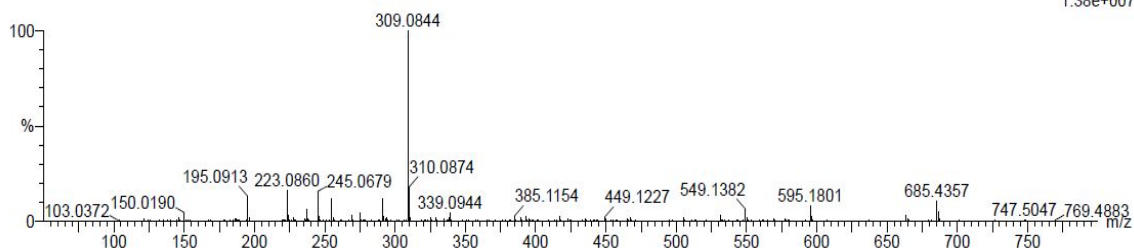

Minimum: -1.5  
Maximum: 2.0 100.0 50.0

| Mass     | Calc. Mass | mDa  | PPM  | DBE | i-FIT | Norm | Conf(%) | Formula          |
|----------|------------|------|------|-----|-------|------|---------|------------------|
| 309.0844 | 309.0851   | -0.7 | -2.3 | 9.5 | 979.2 | n/a  | n/a     | C15 H14 N2 O4 Na |

## <sup>1</sup>H-NMR (400 MHz, CDCl<sub>3</sub>) of 5c

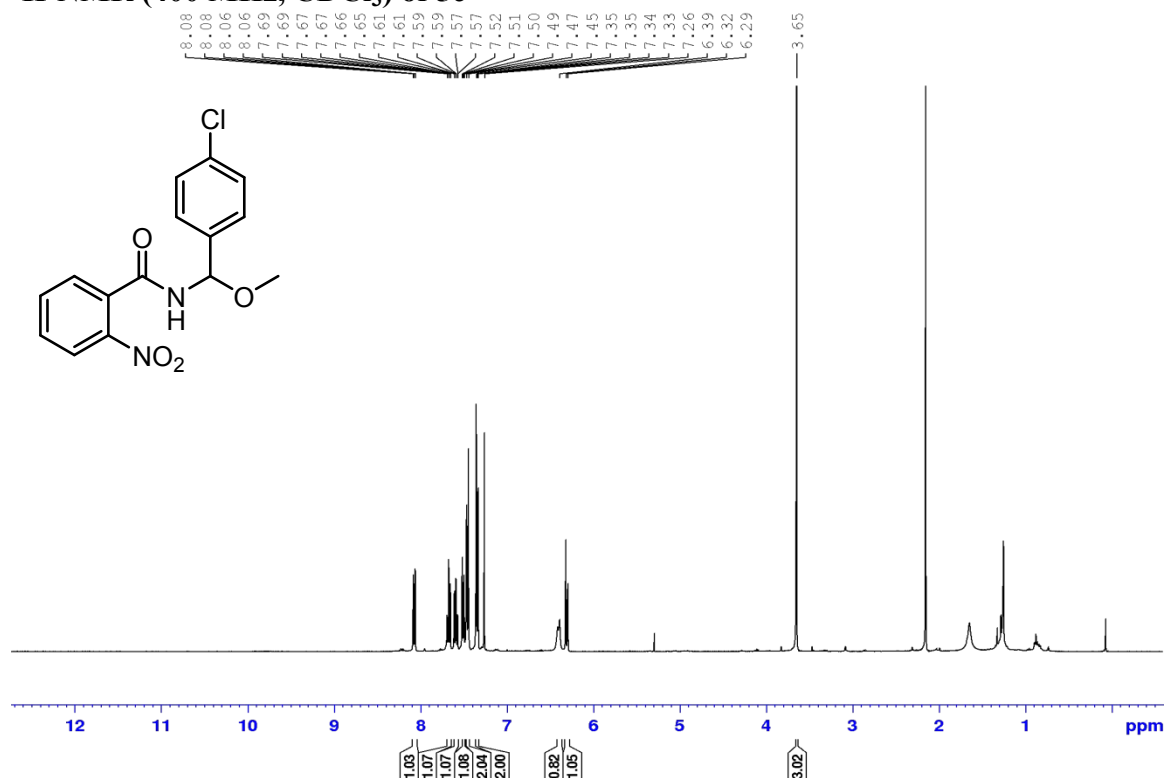

**$^{13}\text{C}\{^1\text{H}\}$ -NMR (101 MHz,  $\text{CDCl}_3$ ) of 5c**

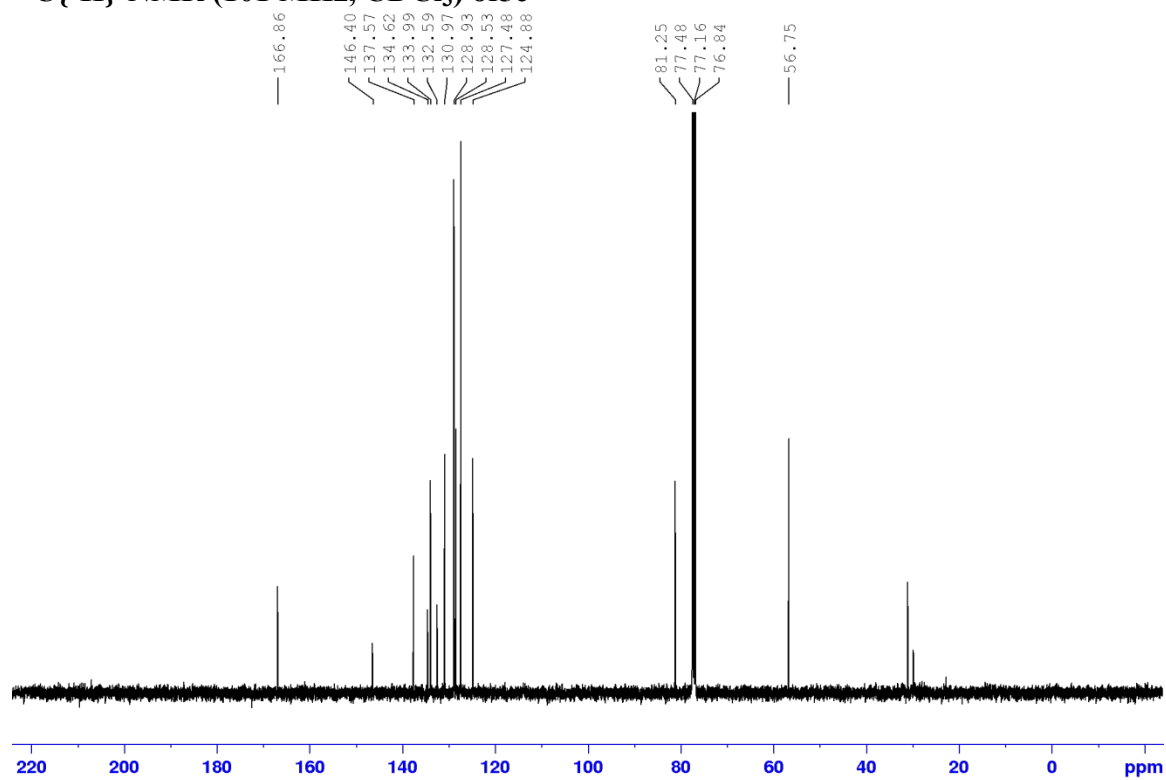

**DEPT-135 (101 MHz,  $\text{CDCl}_3$ ) of 5c**

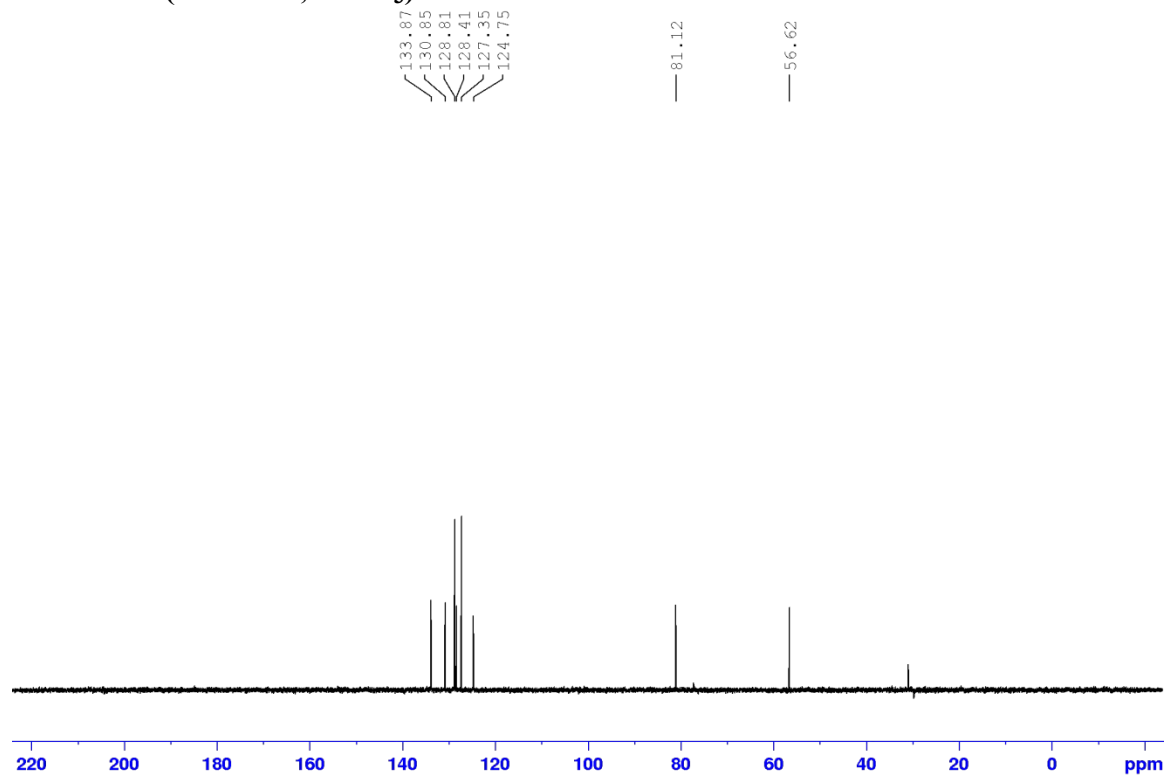

# HRMS of 5c

## Elemental Composition Report

Page 1

### Single Mass Analysis

Tolerance = 100.0 PPM / DBE: min = -1.5, max = 50.0

Element prediction: Off

Number of isotope peaks used for i-FIT = 3

Monoisotopic Mass, Even Electron Ions

63 formula(e) evaluated with 1 results within limits (up to 3 closest results for each mass)

Elements Used:

C: 0-15 H: 0-100 N: 0-2 O: 0-4 Na: 0-1 Cl: 0-1

SM-4Cl NO

QMI DIVISION, CSIR-IIIM JAMMU  
Xevo G2-XS QTOF YFC2015

06-Oct-2023

14:38:06

1: TOF MS ES+

1.34e+006

061023\_28 6 (0.138)

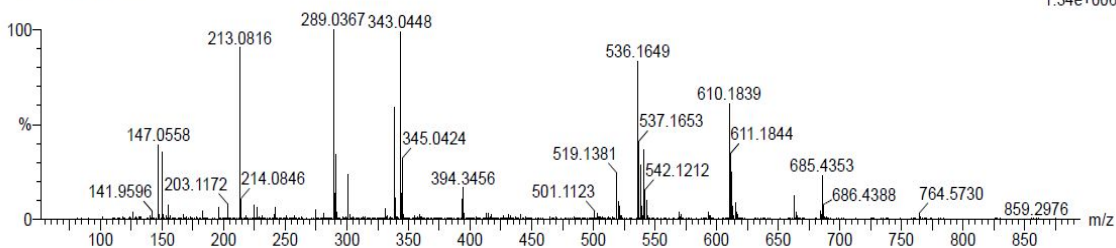

Minimum: -1.5  
Maximum: 2.0 100.0 50.0

| Mass     | Calc. Mass | mDa  | PPM  | DBE | i-FIT | Norm | Conf(%) | Formula             |
|----------|------------|------|------|-----|-------|------|---------|---------------------|
| 343.0448 | 343.0462   | -1.4 | -4.1 | 9.5 | 913.7 | n/a  | n/a     | C15 H13 N2 O4 Na Cl |

## <sup>1</sup>H-NMR (400 MHz, pyridine-d<sub>5</sub>) of 7a

8.73  
8.49  
7.89  
7.58  
7.49  
7.37  
7.31  
7.22

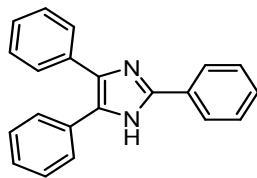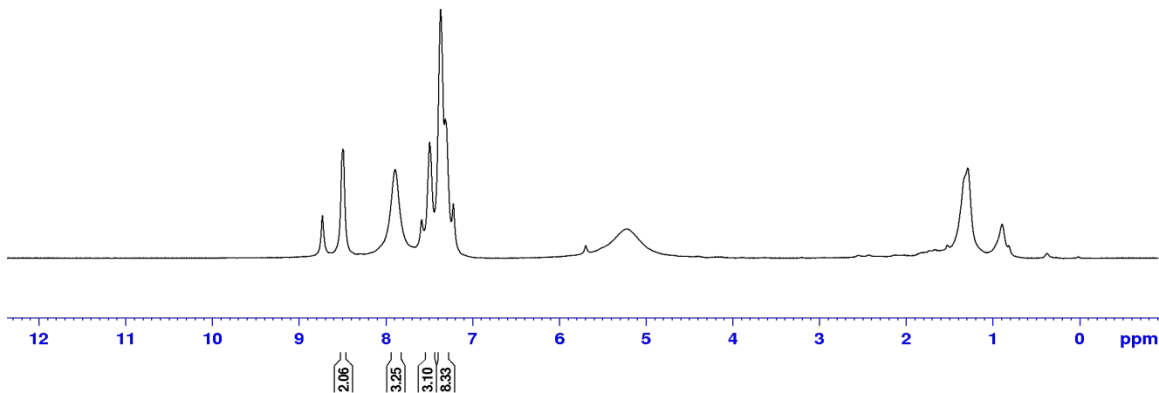

**$^{13}\text{C}\{^1\text{H}\}$ -NMR (101 MHz, pyridine- $d_5$ ) of 7a**

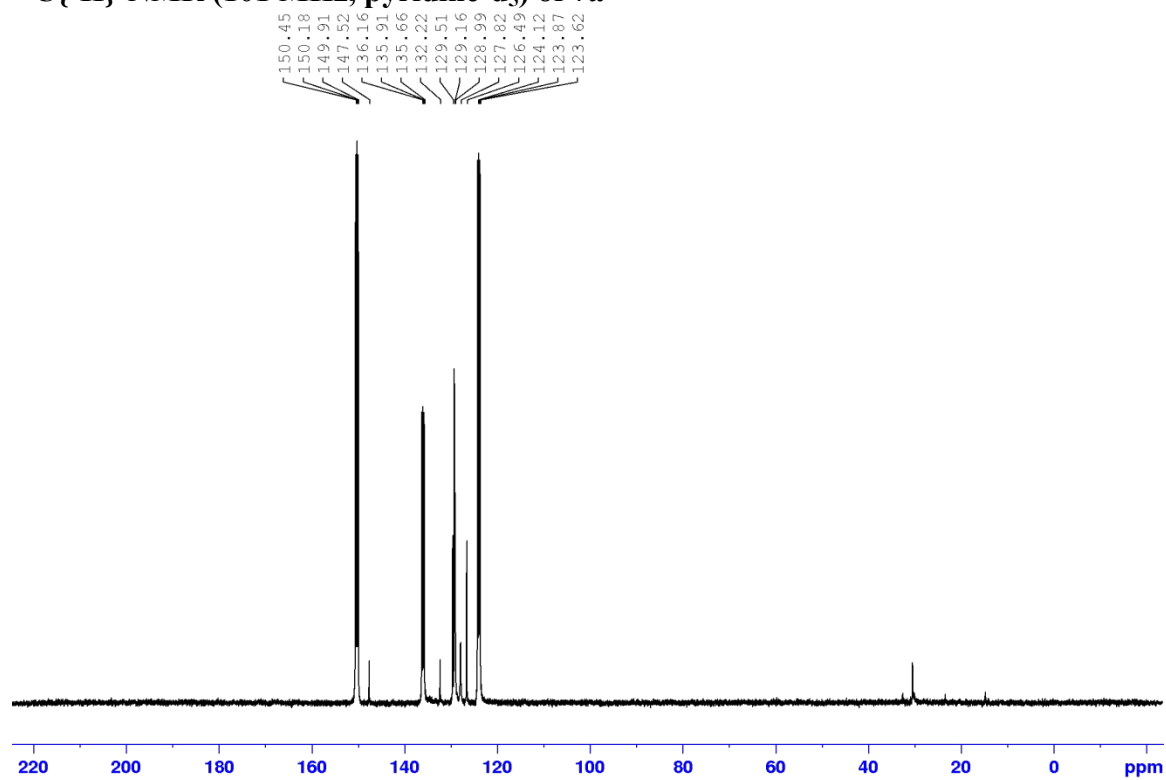

**DEPT-135 (101 MHz, pyridine- $d_5$ ) of 7a**

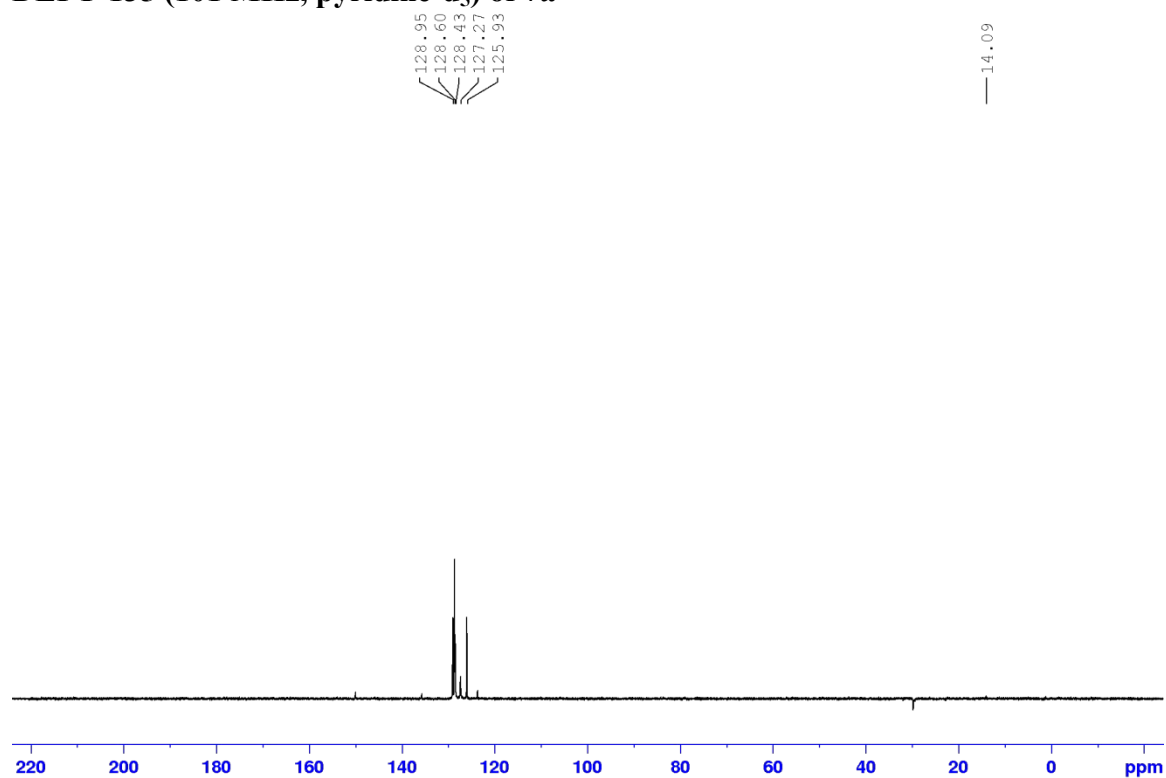



# HRMS of 7a

## Elemental Composition Report

Page 1

### Single Mass Analysis

Tolerance = 100.0 PPM / DBE: min = -1.5, max = 50.0

Element prediction: Off

Number of isotope peaks used for i-FIT = 3

Monoisotopic Mass, Even Electron Ions

6 formula(e) evaluated with 1 results within limits (up to 3 closest results for each mass)

Elements Used:

C: 0-21 H: 0-100 N: 0-2

SM-BENZ

QMI DIVISION, CSIR-IIIM JAMMU  
Xevo G2-XS QTOF YFC2015

06-Oct-2023

14:51:15

1: TOF MS ES+

1.01e+007

061023\_33 9 (0.208)

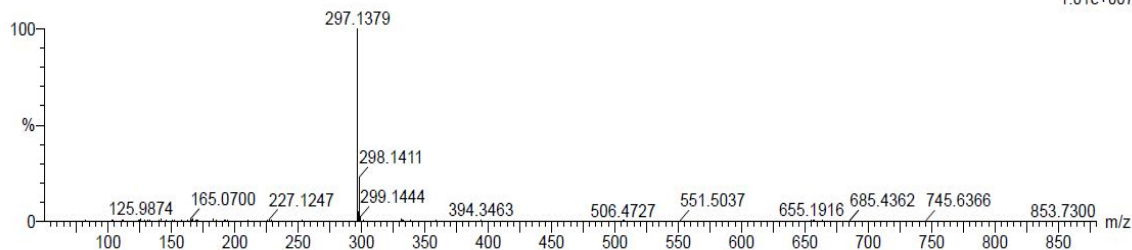

Minimum: -1.5  
Maximum: 2.0 100.0 50.0

| Mass     | Calc. Mass | mDa  | PPM  | DBE  | i-FIT | Norm | Conf(%) | Formula    |
|----------|------------|------|------|------|-------|------|---------|------------|
| 297.1379 | 297.1392   | -1.3 | -4.4 | 14.5 | 948.0 | n/a  | n/a     | C21 H17 N2 |

## <sup>1</sup>H-NMR (400 MHz, pyridine-d<sub>5</sub>) of 7b

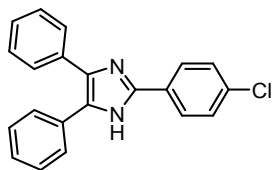

8.74  
8.40  
8.38  
7.89  
7.60  
7.52  
7.50  
7.40  
7.38  
7.36  
7.33  
7.31  
7.30  
7.23

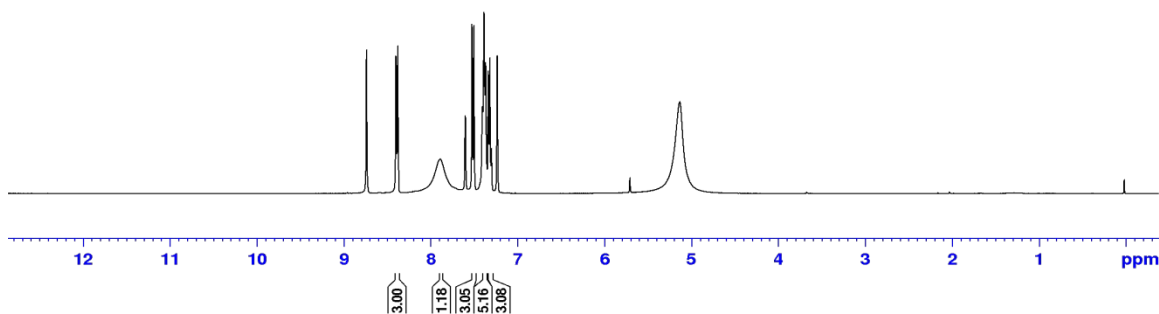

**$^{13}\text{C}\{^1\text{H}\}$ -NMR (101 MHz, pyridine- $d_5$ ) of 7b**

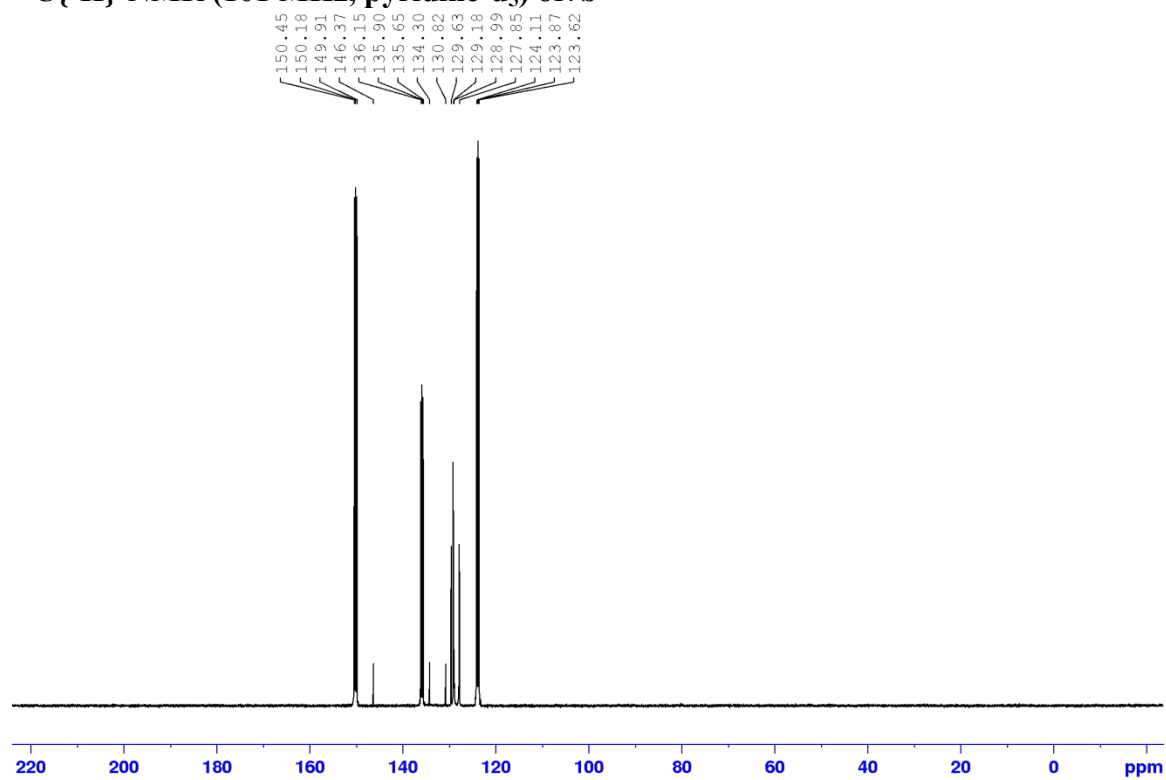

**DEPT-135 (101 MHz, pyridine- $d_5$ ) of 7b**

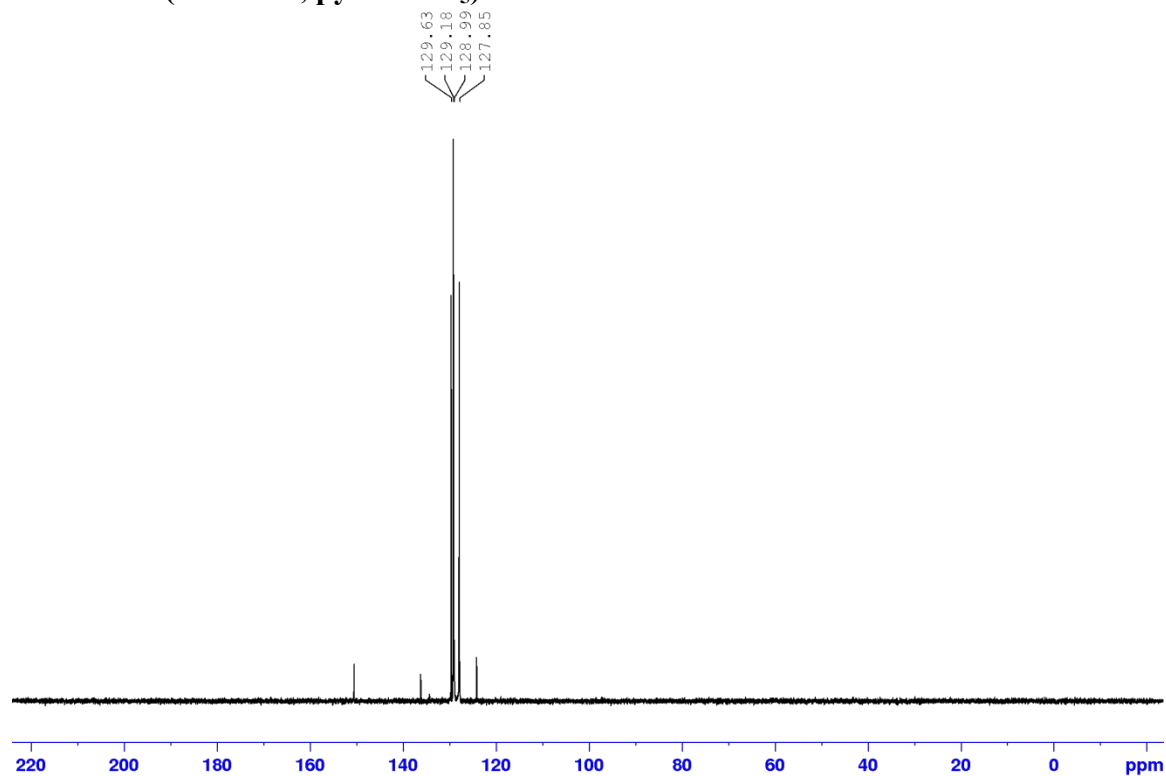

# HRMS of 7b

## Elemental Composition Report

### Single Mass Analysis

Tolerance = 100.0 PPM / DBE: min = -1.5, max = 50.0

Element prediction: Off

Number of isotope peaks used for i-FIT = 3

Monoisotopic Mass, Even Electron Ions

9 formula(e) evaluated with 1 results within limits (up to 3 closest results for each mass)

Elements Used:

C: 0-21 H: 0-100 N: 0-2 Cl: 0-1

SM-4Cl BEN

QMI DIVISION, CSIR-IIIM JAMMU  
Xevo G2-XS QTOF YFC2015

06-Oct-2023

14:35:32

1: TOF MS ES+

6.25e+006

061023\_27.4 (0.104)

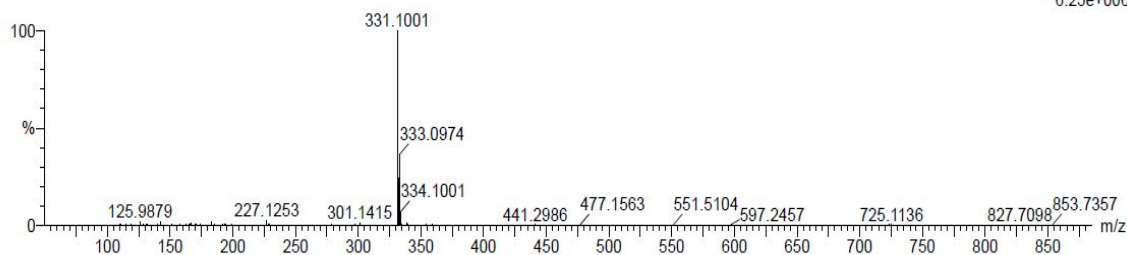

Minimum: -1.5  
Maximum: 2.0 100.0 50.0

| Mass     | Calc. Mass | mDa  | PPM  | DBE  | i-FIT | Norm | Conf(%) | Formula       |
|----------|------------|------|------|------|-------|------|---------|---------------|
| 331.1001 | 331.1002   | -0.1 | -0.3 | 14.5 | 916.3 | n/a  | n/a     | C21 H16 N2 Cl |
